# Supplementary material
Source: PubMed Central journal article supplement (PMC5319826)
Supplement: NIHMS851144-supplement-Supplemental_Materials.pdf [file NIHMS851144-supplement-Supplemental_Materials.pdf]

## Supplemental Methods

**Mice.** All animal procedures were performed based on the “Guide for the Care and Use of Laboratory Animals” (Eighth Edition) and were approved by the Institutional Animal Care and Use Committees at the University of Texas Health Science Center at San Antonio and the University of Mississippi Medical Center. In this study, 3- to 6-month old C57BL/6J wild type (WT) male mice (n=116; The Jackson Laboratory) were used. MMP-9 null mice (n=10) were obtained from our on-site breeding colony and are on the C57BL/6J background strain.[1] All mice were kept in the same room in a light controlled environment with a 12:12 hour light-dark cycle and free access to standard mouse chow and water. MI mice were subjected to permanent occlusion of the left coronary artery as previously described.[2-4] A portion of the mice and tissue used for this study were previously evaluated for MMP-12 and sham effects.[3, 4]

The MMP-9i dose used was calculated based on the results of *in vitro* studies.[5] The molecular weight of the MMP-9i is 12.4 kDa. A delivery of 0.030 µg of MMP-9i per g corresponds to 0.0024 nmol per g. Mice have ~58.5 µL of blood per g of body weight. Thus, the concentration of MMP-9i delivered per day for a 25 g mouse would be  $6 \times 10^{-11}$  mol/ $1.46 \times 10^{-3}$  L = 41 nM. This concentration is considerably higher than the MMP-9i  $K_i$  for MMP-9. Since a pump is being utilized, and delivery is to the heart, one can assume a highly efficient delivery. Triple-helical peptides are stable *in vivo*,[6, 7] as are phosphinic peptides,[8] and phosphinates have slow on-off rates.[9] While the mouse will excrete inhibitor during the course of the day, the pump is used continuously for 7 days.

At 3 h post-MI, infarction was confirmed by echocardiography and electrocardiography, and osmotic pumps with saline or MMP-9 inhibitor diluted in saline (MMP-9i; 0.03 µg/kg/day; Alzet 2001D for D1 or 1007D for D7) were inserted subcutaneously. The alzet pump model 2001D has a pumping rate of 8 µl/hour for a duration of 1 day at 37°C. The alzet pump model 1007D

has a pumping rate of 0.5 µl/hour for the duration of 7 days at 37°C. Mice were sacrificed at days (D) 1 or 7 post-MI (n=6-12 surviving mice/ group for each assay). D0 mice (n=6-12 for each assay) served as no MI controls.

**Echocardiography.** Transthoracic echocardiography was performed using a Vevo 2100™ system (VisualSonics, Toronto, Ontario, Canada) with a 30 MHz image transducer as previously described.[4] Mice were anesthetized with 0.5–2.0% isoflurane in an oxygen mix.

Electrocardiogram, heart rate, and body temperature were monitored throughout the imaging procedure. Measurements were taken from the left ventricle (LV) parasternal long axis (B-mode) and short axis (M-mode) views. Three images from consecutive cardiac cycles were measured and averaged, and images were acquired at heart rates >400 bpm for physiological relevance.

**Survival analysis and autopsy.** The mice were checked daily for survival, and autopsy was performed for all mice that were found dead. At autopsy, cardiac rupture was confirmed if the rupture site was visible on the left ventricle (LV) or a blood clot was observed in the thoracic cavity.

**Tissue harvest and infarct area evaluation.** At sacrifice, mice were anesthetized with 0.5-2.0% isoflurane in an oxygen mix. Heparin was administered (i.p., 4 U/g body weight) and 5 min later, blood was collected from the common carotid artery. The heparinized blood was centrifuged, and proteinase inhibitor cocktail (Roche, Indianapolis, IN) was added to the collected plasma to a final concentration of 1x. The plasma was aliquoted and snap frozen at -80°C.

The hearts were flushed with cardioplegic solution (69 mM NaCl, 12 mM NaHCO<sub>3</sub>, 11 mM glucose, 30 mM 2,3-butanedione monoxime, 10 mM EGTA, 0.001 mM Nifedipine, and 50 mM KCl) to arrest the heart in diastole. The hearts were excised, and the LV and right ventricle (RV) were separated and weighed individually. The lung weights (wet and dry) and tibia lengths were measured. The LV was sliced into apex, middle, and base sections and stained with 1% 2, 3, 5-triphenyltetrazolium chloride (TTC, Sigma-Aldrich, St. Louis, MO) and photographed for

evaluation of the infarct area using Photoshop (Adobe Systems Inc., San Jose, CA). The infarct area is presented as percentage of infarct area to total LV area. The LV infarct region (LVI) was separated, snap frozen, and stored at -80°C for real time RT<sup>2</sup>-PCR analysis (n=6/ group) or immunoblotting analysis (n=6/ group). The LV middle section was fixed in 10% zinc formalin (Fisher Scientific, Pittsburgh, PA), paraffin-embedded, and sectioned for histological examination (n=12/group).

**MMP-9 activity assay.** A standard colorimetric kit (EMD Millipore, Darmstadt, Germany; CBA 003) was used per manufacturer instructions to measure MMP-9 activity in D1 plasma samples from saline and MMP-9i treated mice (n=12/group). The assay was performed in triplicate.

**Protein extraction and immunoblotting.** The LV was homogenized in 1x phosphate-buffered saline (PBS) with 1x proteinase inhibitor cocktail (Roche; 16 µL for every mg of wet LV) using the Power Gen 1000 Homogenizer (Fisher Scientific, Pittsburgh, PA). The homogenate was centrifuged at 4700 rpm for 15 min. The supernatant (soluble protein fraction) was extracted and stored at -80°C. The remaining pellet (insoluble protein fraction) was homogenized in Protein Extraction Reagent 4 (Sigma) with 1x protease inhibitor. The insoluble protein fraction was stored at -80°C. Protein levels were quantified by Bradford assay (Bio-Rad, Hercules, CA). Total protein (10 µg) from each fraction (soluble and insoluble) was run on 4–12% criterion Bis–Tris gels (Bio-Rad, Hercules, CA), transferred onto nitrocellulose membranes (Bio-Rad), and stained with MemCode™ Reversible Protein Stain Kit (Thermo Scientific, Waltham, MA) to verify loading accuracy. Membranes were blocked with 5% non-fat milk (Bio-Rad) and incubated overnight at 4°C with primary antibodies against collagen 1 (Cedarlane 558739, 1:2000), MMP-2 (Cell signaling 13132, 1:1000), fibronectin (Millipore AB1954, 1:5000), caspase 3 (Cell signaling 9662, 1:1000), CD18 (Abcam ab157146, 1:1000), and CD36 (Novus Biologicals NB400; 1:1000) followed by incubation at room temperature with appropriate secondary antibodies. Signal was detected using Amersham ECL Substrate (GE Healthcare, Waukesha, WI). Protein levels of individual samples were quantified by densitometry using the IQ-TL image

analysis software (GE Healthcare, Waukesha, WI). Densitometric units were normalized to the densitometry of the total protein stain for the entire lane.

**Gelatin zymography.** Samples (25 µg total soluble protein) were loaded into non-denaturing 10% polyacrylamide gels containing 0.1% gelatin, electrophoresed, renatured, and developed as described previously.[10] To quantify activity, gel images were acquired and inverted, and densitometry was measured using the IQ-TL image analysis software (GE Healthcare, Waukesha, WI).

**Real Time RT<sup>2</sup>-PCR.** RNA extraction was performed using TRIzol® Reagent (Invitrogen Life Technologies, Grand Island, NY, USA) according to manufacturer instructions. RNA levels were quantified using the NanoDrop ND-1000 Spectrophotometer (Thermo Scientific, Waltham, MA, USA). Reverse transcription of RNA (0.4 µg) was performed using the RT<sup>2</sup> First Strand Kit (Qiagen, Valencia, CA, USA). Real-time RT<sup>2</sup>-PCR gene array for inflammatory cytokines and receptors (Qiagen) and for extracellular matrix and adhesion molecules (Qiagen) were performed to quantify gene expression levels. The gene levels were normalized to the reference gene hypoxanthine guanine phosphoribosyl transferase 1 (*Hprt1*), and the data reported as  $2^{-\Delta Ct}$  values X 100 for extracellular matrix genes and  $2^{-\Delta Ct}$  values X 1000 for inflammatory genes. The experiments were performed according to the MIQE guidelines with one exception. *Hprt1*, was the only reference gene that showed no change in expression after MI (*GusB*, *Hsp90ab1*, *Actb* and *Gapdh* were all significantly changed post-MI).[11]

Gene names shown in Table 2, in alphabetical order, are: *Adamts* - A disintegrin-like and metalloproteinase (reprolysin type) with thrombospondin type 1 motif, *Cdh* – Cadherin, *Cd44* – *Cd44* antigen, *Cntn1* – Contactin 1, *Col* – Collagen, *Ctgf* – Connective tissue growth factor, *Ctnna* - Catenin (cadherin associated protein), alpha1, *Ctnnb1* – Catenin beta 1, *Ecm* – Extracellular matrix protein, *Emilin1* - Elastin microfibril interfacier 1, *Fbln1* – Fibulin 1, *Fn1* – Fibronectin 1, *Hapln1* – Hyaluronan and proteoglycan link protein I, *Hc* - Hemolytic complement, *Icam1* - Intercellular adhesion molecule 1, *Itga* – Integrin alpha, *Itgae* – Integrin alpha E,

epithelial-associated, Itgam – Integrin alpha M, Itgav - Integrin alpha V, Itgax –Integrin alpha X, Itgb – Integrin beta, Lama – Laminin, Lamb – Laminin beta, Lamc – Laminin gamma, Ncam – Neural cell adhesion molecule, Pecam1 - Platelet/endothelial cell adhesion molecule 1, Postn – Periostin, Sele – Selectin, endothelial cell, Sell – Selectin lymphocyte, Selp – Selectin platelet, Sgce – Sarcoglycan epsilon, Sparc - Secreted acidic cysteine rich glycoprotein, Spock1 - Sparc/osteonectin, cwcv and kazal-like domains proteoglycan 1, Spp1 – Osteopontin, Syt1 - Synaptotagmin I, Tgfbi – Transforming growth factor, beta induced, Thbs - Thrombospondin, Timp - Tissue inhibitor of metalloproteinase, Tnc – Tenascin C, Vcam1 – Vascular cell adhesion molecule 1, Vcan – Versecan, and Vtn - Vitronectin.

Gene names shown in Table 3, in alphabetical order, are: Abcf1 – ATP-binding cassette, sub-family F (GCN20) member 1, Bcl – B-cell leukemia/lymphoma 6, C3 – Complement component 3, Casp1 – Caspase 1, Ccl – Chemokine (C-C) ligand, Ccr – Chemokine (C-C) receptor, Cd40lg – Cd40 ligand, Cx3cl – Chemokine (C-X3-C motif) ligand 1, Cxcl – Chemokine (C-X-C) ligand, Cxcr – Chemokine (C-X-C motif) receptor 3, Il – Interleukin, Il10rb – Interleukin 10 receptor beta, Il1f - Interleukin 1 family, member, Il1r – Interleukin 1 receptor type I, Il1r2 – Interleukin 1 receptor type I, Il2rb – Interleukin 2 receptor beta chain, Il2rg – Interleukin 2 receptor gamma chain, Il6ra - Interleukin 6 receptor, alpha, Il6st – Interleukin 6 signal transducer, Il8rb – Interleukin 8 receptor, beta, Itgam – Integrin alpha M, Itgb – Integrin beta 2, Lta – Lymphotoxin, Mif – Macrophage migration inhibitory factor, Pf4 – Platelet factor 4, Scye1 – Small inducible cytokine subfamily E member 1, Spp1 – Osteopontin, Tgfb – Transforming growth factor beta, Tnf – Tumor necrosis factor, Tnfrsf1 - Tumor necrosis factor receptor superfamily, member 1, Tollip – Toll interacting protein, and Xcr1 – Chemokine (C motif) receptor 1.

**Immunohistochemistry.** The middle section of the LV was paraffin-embedded and sectioned at 5 µm for immunohistochemical staining as described previously.[12] Heat mediated antigen retrieval (Target retrieval solution, Dako North America, Inc., Carpinteria, CA, USA) was

performed to expose antigen epitopes. Sections were blocked with rabbit blocking serum of Vectastain elite ABC Kit (Vector Laboratories, Marion, IA, USA). A primary antibody specific for macrophages (Mac-3, Cedarlane CL8943AP; 1:100), neutrophils (anti-neutrophil mouse monoclonal, Cedarlane CL8993AP; 1:100), or cleaved caspase 3 (Cell signaling 9661, 1:100) was used at 4°C overnight. Later, the sections were incubated with the respective secondary antibodies. Positive staining was visualized by HistoMark Black (KPL 54-75-00), and eosin was used as a counterstain. Picrosirius red (PSR) staining was used to examine collagen deposition. A terminal deoxynucleotidyl transferase dUTP nick end labeling (TUNEL; Roche Diagnostics; 11684809910) kit was used to detect apoptosis per manufacturer instructions. Images were captured at 40X magnification with Image-Pro software (Media Cybernetics, Bethesda, MD, USA) and quantification was reported as the percentage of positively stained area to total area.

**Plasma proteomics.** Plasma samples from unoperated WT and MMP-9 null male mice were used (n=10/group).

Trypsin digestion. Plasma samples were collected from unoperated controls (D0) and denatured and reduced by adding 8 M urea and 12 mM Tris (2-carboxyethyl) phosphine hydrochloride (TCEP) in 1 M ammonium bicarbonate and incubating at 37°C for 1 h. Alkylation was performed with 16 mM iodoacetamide at room temperature in the dark for 30 min. The samples were diluted 5-fold with HPLC water prior to the addition of trypsin (Promega, Madison, WI) at a ratio of 1:50 (w/w, enzyme:protein). The samples were digested at 37°C overnight with gentle shaking followed by centrifugation to remove precipitate. Peptides were cleaned by Sep-Pak Vac C18 cartridge (Waters, Milford, MA). Peptide concentration was determined by BCA assay (Thermo Fisher Scientific, Rochford, IL).

N-Linked glycopeptide capture. N-linked glycopeptides were isolated from the tryptic peptides using the solid phase extraction of glycopeptides (SPEG) method.[13, 14] Briefly, peptides were oxidized with 10 mM sodium periodate (Bio-Rad, Hercules, CA) at room temperature for 1 h. Glycopeptides were covalently conjugated to a solid support via hydrazide

chemistry (Bio-Rad, Hercules, CA), with incubation at room temperature overnight. The efficiency of glycopeptide capture was evaluated previously by Zhou *et al.* and found to be 85% using this approach.[15] The hydrazide beads were washed with 1.5 M NaCl and HPLC water prior to release of formerly *N*-linked glycopeptides from solid support by PNGase F (New England Biolabs, Ipswich, MA) at 37°C overnight. The eluent was purified by Sep-Pak Vac C18 cartridge (Waters, Milford, MA) and resuspended in 20 µL of 0.4% Trifluoroacetic acid.

Mass spectrometry analysis. For the RefSeq database search, the precursor mass tolerance and fragment mass tolerance were set at 15 ppm and 0.05 Da, respectively. Trypsin was specified as the protease. The fixed modification was set as carbamidomethylation (C), and other modifications were set as flexible modification as follows: deamidation (N) and oxidation (M). Full-tryptic end and two missed cleavage sites were allowed. A decoy version of the RefSeq mouse database was used to estimate peptide and protein false discovery rate. The average specificity of the glycopeptide isolation was ~92%, indicating that ~8% of the total identified peptides were non-glycopeptides. The non-glycosylated peptides were removed from the list.

LC-MS quantification. Peptides were quantified by label-free relative quantification based on integrated peptide peak intensities using the SIEVE software, version 2.1 (Thermo Fisher, Waltham, MA, USA). Frame parameters were set at a retention time width of 2.5 min and an MZ width of 6 ppm, with intensity threshold of  $10^6$ . The peak intensity was normalized to Total Ion Current (TIC) by SIEVE. A frame abundance ratio was calculated as the ratio of the average integrated intensity of the null samples to the average integrated intensity of the WT samples. Frames were identified by importing Proteome Discoverer searched files. The false discovery rate was calculated as the ratio of changed proteins in 8000 permutations of the null genotype against the WT genotype. The volcano plot was constructed using the Metaboanalyst 3.0 software program ([www.metaboanalyst.ca/](http://www.metaboanalyst.ca/)). Parameters for selection of important features were set with a fold change threshold of >1.3 and t-test threshold of  $p < 0.05$ .

**Statistical analyses.** Data was collected in a blinded manner, and results are presented as mean±SEM. Survival rates were analyzed by Kaplan-Meier survival analysis and compared by the log-rank test. Rupture rates were analyzed by Fisher's exact test. Two group comparisons were analyzed by Student's t-test. Multiple group comparisons were analyzed using one-way ANOVA, followed by the Student Newman-Keuls when the Bartlett's variation test was passed, or using the nonparametric Kruskal-Wallis test, followed by Dunn post-hoc test when the Bartlett's variation test did not pass. Statistical significance was set at  $p < 0.05$ . All analyses were performed using Prism 6.0 (GraphPad Software, La Jolla, CA).

## References

- [1] A. Yabluchanskiy, Y. Ma, K.Y. DeLeon-Pennell, R. Altara, G.V. Halade, A.P. Voorhees, N.T. Nguyen, Y.F. Jin, M.D. Winniford, M.E. Hall, H.C. Han, M.L. Lindsey, Myocardial Infarction Superimposed on Aging: MMP-9 Deletion Promotes M2 Macrophage Polarization, *J Gerontol A Biol Sci Med Sci* 71(4) (2016) 475-83.
- [2] Y.L.S. Salto-Tellez M, El-Oakley RM, Tang TP, ZA AL, Lim SK, Myocardial infarction in the C57BL/6J mouse: a quantifiable and highly reproducible experimental model, *Cardiovascular pathology : the official journal of the Society for Cardiovascular Pathology* 2004 (2004) 91-7.
- [3] R.P. Iyer, L.E. de Castro Bras, P.L. Cannon, Y. Ma, K.Y. DeLeon-Pennell, M. Jung, E.R. Flynn, J.B. Henry, D. Bratton, J. White, L. Fulton, A. Grady, M.L. Lindsey, Defining the Sham Environment for Post Myocardial Infarction Studies in Mice, *American journal of physiology. Heart and circulatory physiology* (2016) ajpheart 00067 2016.
- [4] R.P. Iyer, N.L. Patterson, F.A. Zouein, Y. Ma, V. Dive, L.E. de Castro Bras, M.L. Lindsey, Early matrix metalloproteinase-12 inhibition worsens post-myocardial infarction cardiac dysfunction by delaying inflammation resolution, *International journal of cardiology* 185 (2015) 198-208.
- [5] J.L. Lauer-Fields, J.K. Whitehead, S. Li, R.P. Hammer, K. Brew, G.B. Fields, Selective modulation of matrix metalloproteinase 9 (MMP-9) functions via exosite inhibition, *The Journal of biological chemistry* 283(29) (2008) 20087-95.
- [6] C.Y. Fan, C.C. Huang, W.C. Chiu, C.C. Lai, G.G. Liou, H.C. Li, M.Y. Chou, Production of multivalent protein binders using a self-trimerizing collagen-like peptide scaffold, *FASEB journal*



: official publication of the Federation of American Societies for Experimental Biology 22(11) (2008) 3795-804.

[7] T. Koide, N. Yamamoto, K.B. Taira, H. Yasui, Fecal Excretion of Orally Administered Collagen-Like Peptides in Rats: Contribution of the Triple-Helical Conformation to Their Stability, *Biological & pharmaceutical bulletin* 39(1) (2016) 135-7.

[8] R. Cursio, B. Mari, K. Louis, P. Rostagno, M.C. Saint-Paul, J. Giudicelli, V. Bottero, P. Anglard, A. Yiotakis, V. Dive, J. Gugenheim, P. Auberger, Rat liver injury after normothermic ischemia is prevented by a phosphinic matrix metalloproteinase inhibitor, *FASEB journal : official publication of the Federation of American Societies for Experimental Biology* 16(1) (2002) 93-5.

[9] I. Yiallourous, S. Vassiliou, A. Yiotakis, R. Zwilling, W. Stocker, V. Dive, Phosphinic peptides, the first potent inhibitors of astacin, behave as extremely slow-binding inhibitors, *The Biochemical journal* 331 ( Pt 2) (1998) 375-9.

[10] M. Lindsey, K. Wedin, M.D. Brown, C. Keller, A.J. Evans, J. Smolen, A.R. Burns, R.D. Rossen, L. Michael, M. Entman, Matrix-dependent mechanism of neutrophil-mediated release and activation of matrix metalloproteinase 9 in myocardial ischemia/reperfusion, *Circulation* 103(17) (2001) 2181-7.

[11] M.L. Lindsey, R.P. Iyer, R. Zamilpa, A. Yabluchanskiy, K.Y. DeLeon-Pennell, M.E. Hall, A. Kaplan, F.A. Zouein, D. Bratton, E.R. Flynn, P.L. Cannon, Y. Tian, Y.F. Jin, R.A. Lange, D. Tokmina-Roszyk, G.B. Fields, L.E. de Castro Bras, A Novel Collagen Matricryptin Reduces Left Ventricular Dilation Post-Myocardial Infarction by Promoting Scar Formation and Angiogenesis, *Journal of the American College of Cardiology* 66(12) (2015) 1364-74.

[12] Y. Ma, Y.A. Chiao, J. Zhang, A.M. Manicone, Y.F. Jin, M.L. Lindsey, Matrix metalloproteinase-28 deletion amplifies inflammatory and extracellular matrix responses to cardiac aging, *Microscopy and microanalysis : the official journal of Microscopy Society of America, Microbeam Analysis Society, Microscopical Society of Canada* 18(1) (2012) 81-90.

[13] Y. Tian, Y. Zhou, S. Elliott, R. Aebersold, H. Zhang, Solid-phase extraction of N-linked glycopeptides, *Nature protocols* 2(2) (2007) 334-9.

[14] H. Zhang, X.J. Li, D.B. Martin, R. Aebersold, Identification and quantification of N-linked glycoproteins using hydrazide chemistry, stable isotope labeling and mass spectrometry, *Nature biotechnology* 21(6) (2003) 660-6.

[15] Y. Zhou, R. Aebersold, H. Zhang, Isolation of N-linked glycopeptides from plasma, *Analytical chemistry* 79(15) (2007) 5826-37.

Supplemental Figure 1

D0

D7 Saline

D7 MI

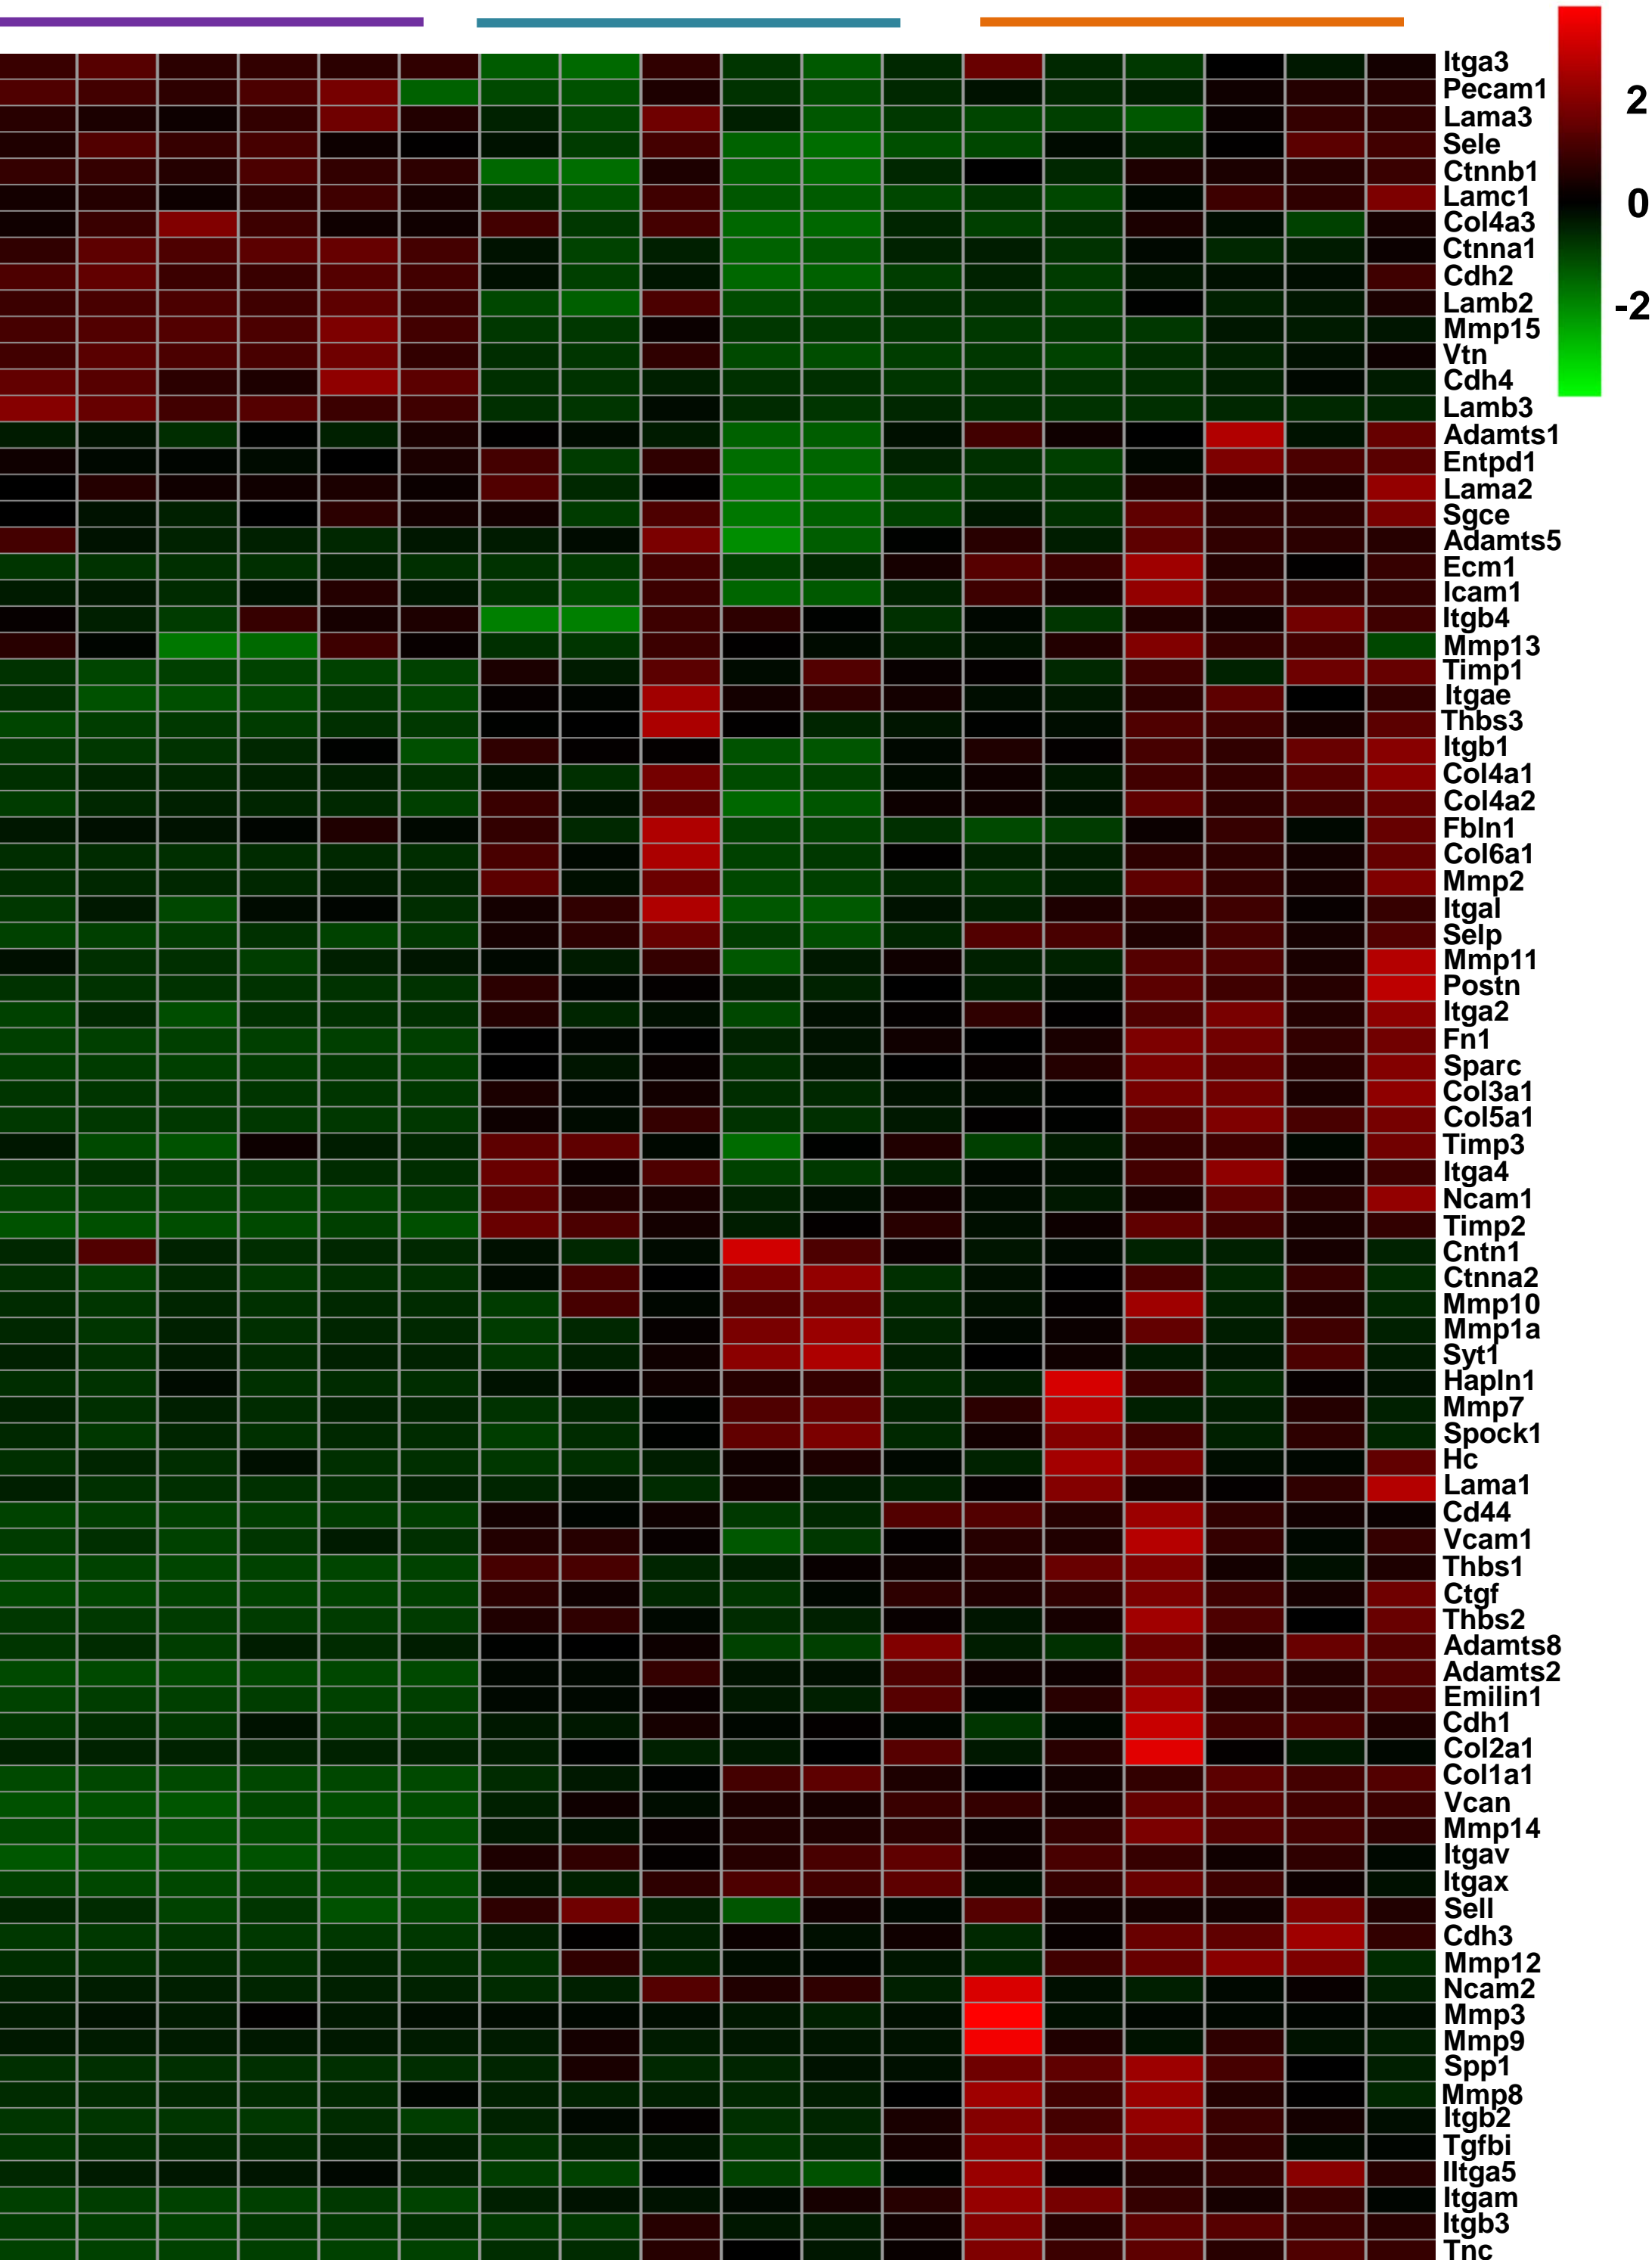

Supplemental Figure 2

D0

D7 Saline

D7 MI

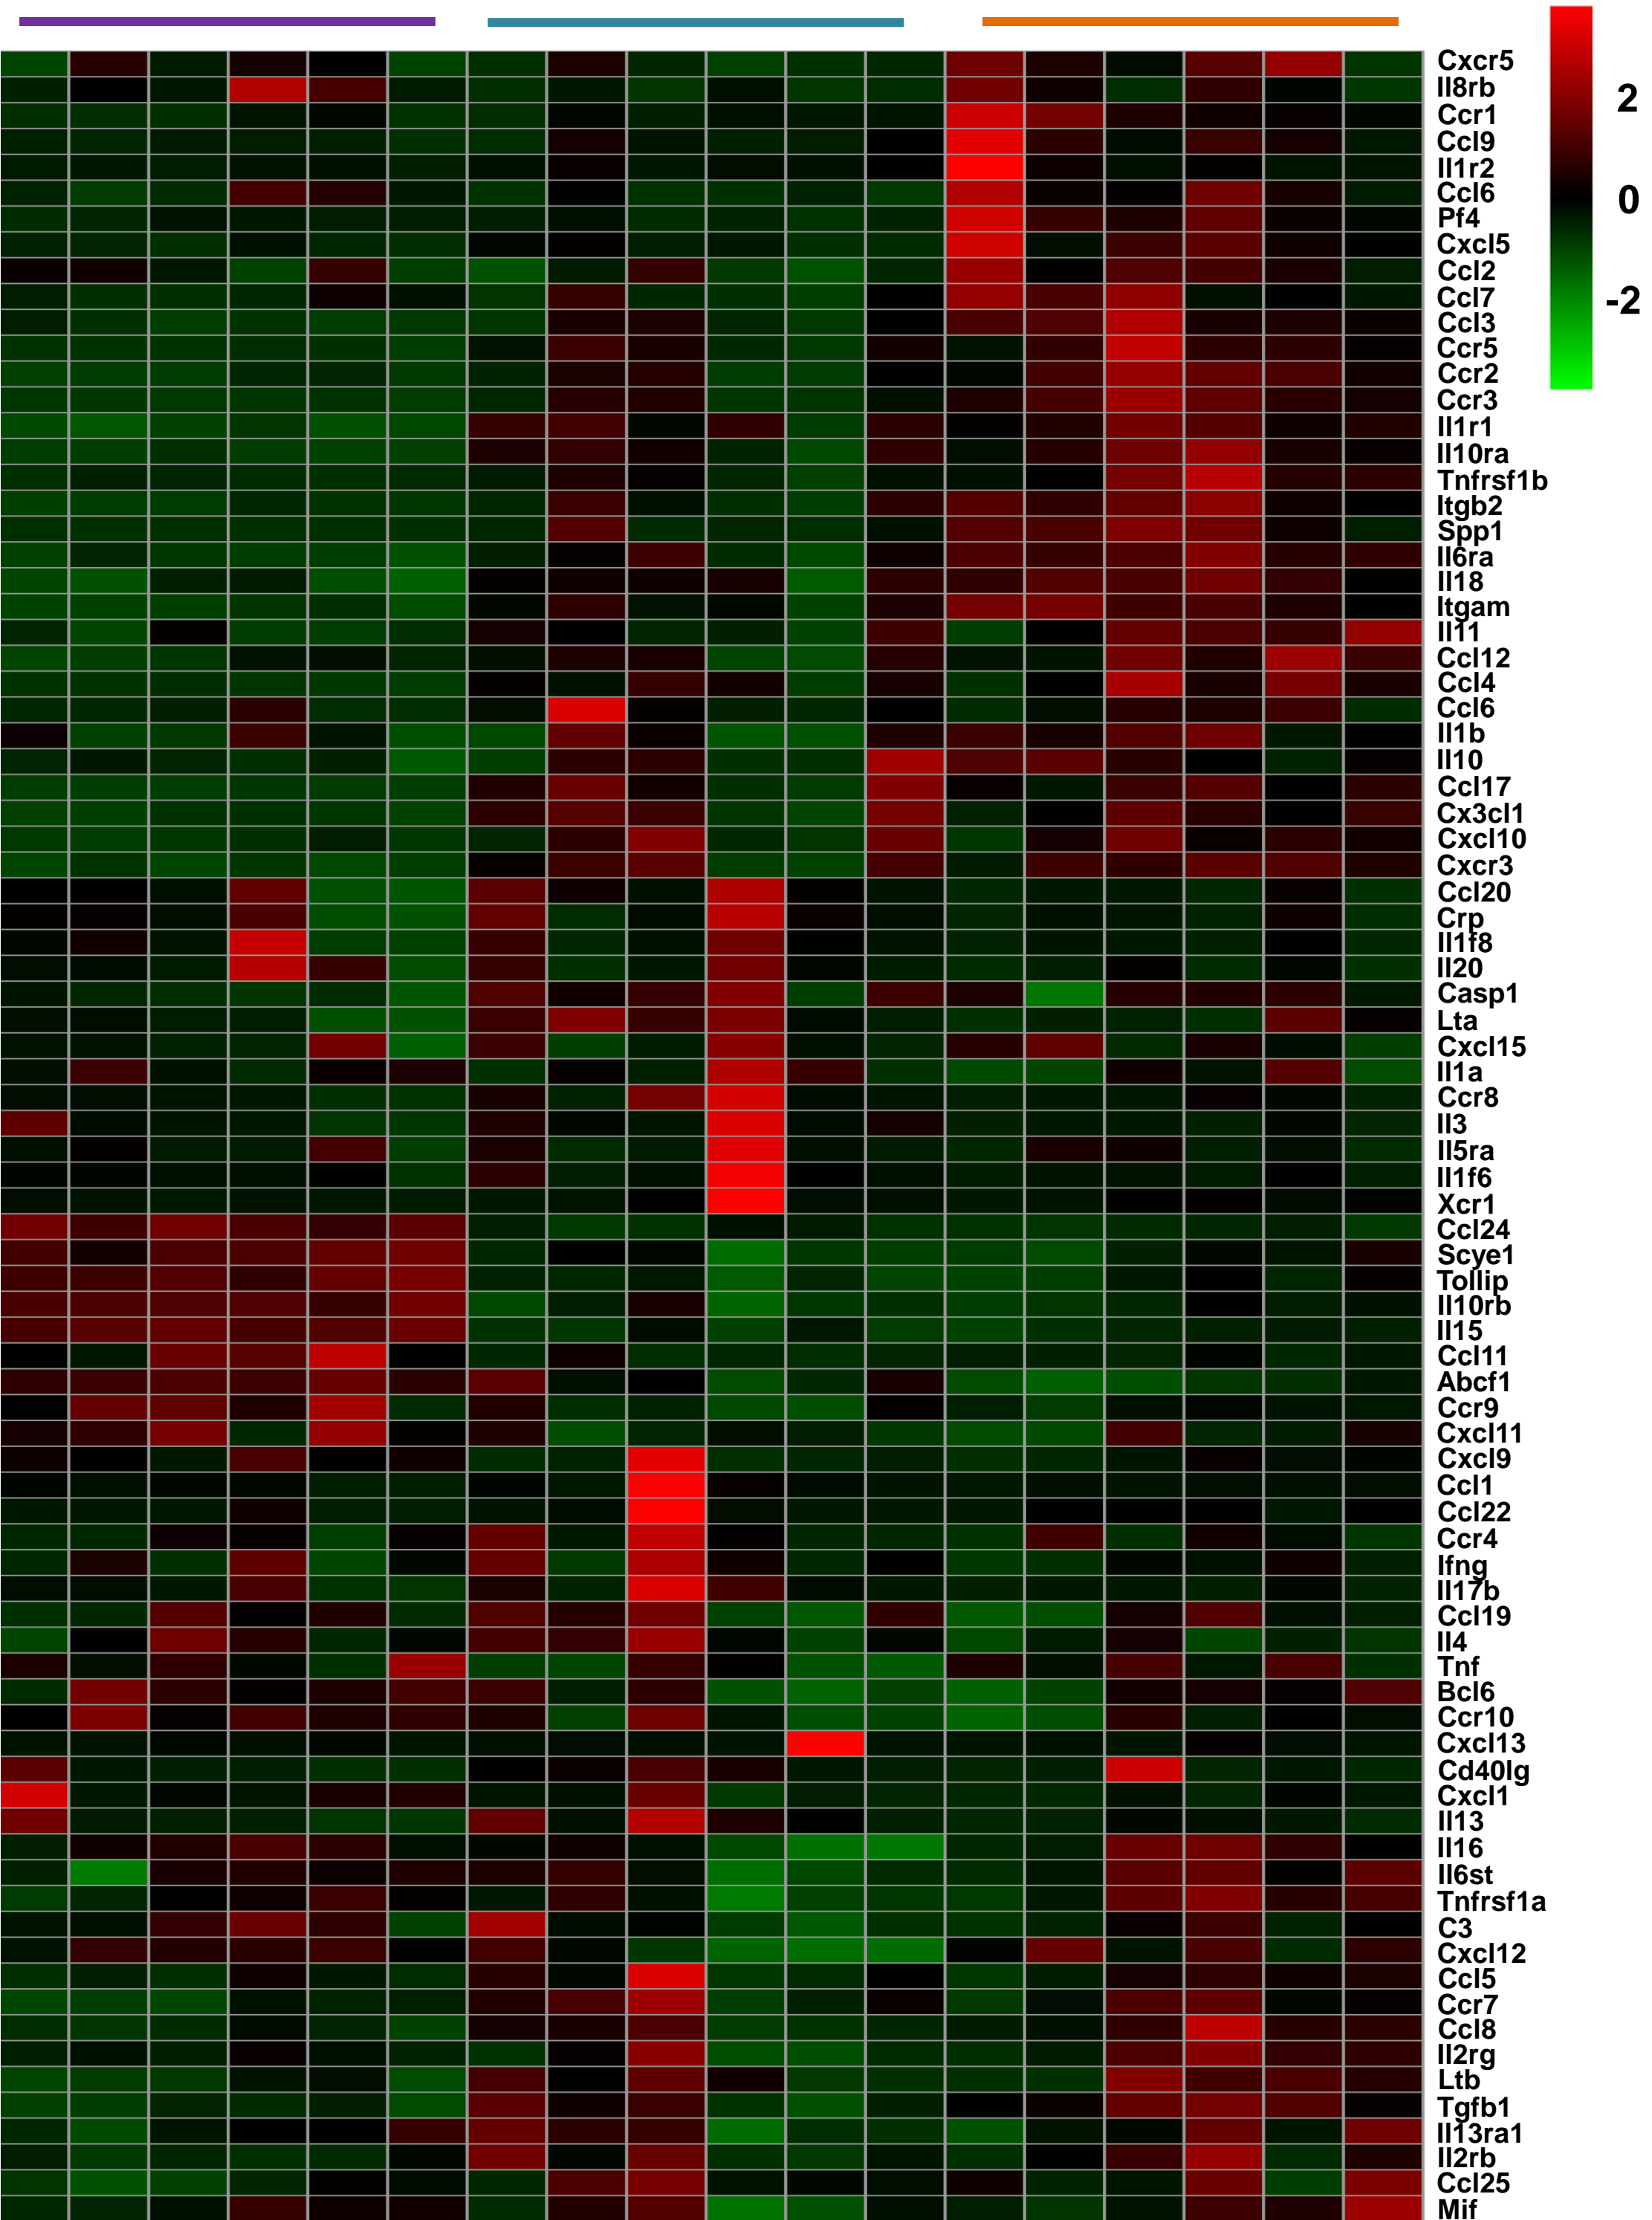

Supplemental Table S1. Proteins identified in wild type (WT) and MMP-9 null (Null) plasma, ranked by p value <0.05 (in blue) and fold- change >2 or <0.5 (dark blue). Of the 359 proteins identified, 34 were statistically different, of which 21 had at least 2-fold overexpression or 0.5-fold underexpression in the Null group. Values are peak intensities.

| Accession # | Protein                                                                                 | PEPTIDE                            | Xcorr | MZ     | % Coverage | MW [kDa] |
|-------------|-----------------------------------------------------------------------------------------|------------------------------------|-------|--------|------------|----------|
| 170295832   | extracellular matrix protein 1                                                          | QIPGLIQNMTIR                       | 2.5   | 700.9  | 31.7%      | 62.8     |
| 294997253   | histocompatibility 2, blastocyst                                                        | EQNYTCHVYHEGLPEPLTLR               | 3.5   | 600.8  | 19.6%      | 40.2     |
| 449083339   | fibronectin                                                                             | HEEGHMLNCTCFGQGR                   | 5.2   | 650.6  | 22.5%      | 260.0    |
| 6755987     | vitronectin                                                                             | NISEGFSGIPDNVDAAFALPAHR            | 2.9   | 800.7  | 33.1%      | 54.8     |
| 226531069   | inter alpha-trypsin inhibitor, heavy chain 4                                            | VSGQMhMQNITFQTEASVAQOEK            | 3.9   | 870.4  | 33.3%      | 104.5    |
| 6755987     | vitronectin                                                                             | NISEGFSGIPDNVDAAFALPAHR            | 4.2   | 800.4  | 33.1%      | 54.8     |
| 160358829   | hemopexin                                                                               | NGTAHGNSTHPMHSR                    | 3.4   | 541.2  | 54.1%      | 51.3     |
| 309262028   | ig alpha chain C region                                                                 | LSGKPTNVSVSVMSEGDGICY              | 3.1   | 1165.5 | 14.3%      | 44.6     |
| 68131562    | sulfhydryl oxidase 1 a                                                                  | NGSVSRVPVLVESR                     | 4.7   | 500.6  | 20.1%      | 82.7     |
| 309262028   | ig alpha chain C region                                                                 | QGDQYSCMVGHEALPMNFTQK              | 3.2   | 825.7  | 14.3%      | 44.6     |
| 57222278    | major urinary protein 26                                                                | AFVENITVLENSLVFK                   | 4.2   | 912.5  | 22.7%      | 21.2     |
| 21313152    | microfibril-associated glycoprotein 4                                                   | VDLEDFENNTAYAK                     | 3.4   | 815.4  | 11.3%      | 28.9     |
| 110347564   | ceruloplasmin b                                                                         | HYIIAAEEVIWNYAPSGTDIFTGENLTALESDDR | 5.1   | 959.4  | 29.7%      | 121.1    |
| 261823995   | serum paraoxonase/arylesterase 1                                                        | ITVVYAENGTVLQGTTVASVYKGG           | 3.1   | 833.8  | 22.3%      | 39.5     |
| 7305235     | leukemia inhibitory factor receptor 1                                                   | NPLGQAQSAVVINVTET                  | 5.1   | 599.7  | 28.2%      | 122.5    |
| 89994747    | protocadherin beta 20                                                                   | RAEYNITITASDMGTPR                  | 1.9   | 949.0  | 3.6%       | 87.7     |
| 7657429     | periostin 1                                                                             | GVNETLLVNELK                       | 3.3   | 665.4  | 18.1%      | 90.2     |
| 124286805   | complement C1q subcomponent subunit A                                                   | VLTNQESPYQNHTGR                    | 4.0   | 582.3  | 29.0%      | 26.0     |
| 157671921   | ATPase, class I, type 8B, member 4                                                      | KLYNNTSWIENLCKK                    | 2.0   | 928.5  | 9.7%       | 135.1    |
| 68131562    | sulfhydryl oxidase 1 a                                                                  | FFQAFKNGSGATLPGAGANVQTLR           | 3.4   | 852.4  | 20.1%      | 82.7     |
| 168229262   | serine (or cysteine) peptidase inhibitor, clade A (alpha-1 antiproteinase, antitrypsin) | KLLNDYVSNQTOGMK                    | 2.3   | 935.5  | 30.2%      | 47.3     |
| 7305235     | leukemia inhibitory factor receptor 1                                                   | VPSNSTETVIESDQFQPGVR               | 5.1   | 1096.5 | 28.2%      | 122.5    |
| 31982712    | carboxypeptidase B2                                                                     | EVHFFVNASDVDSVK                    | 5.3   | 847.4  | 25.1%      | 48.8     |
| 377837112   | h-2 class I histocompatibility antigen                                                  | EKNYTCHVEHEGLPEPLTLR               | 2.6   | 789.4  | 22.2%      | 39.6     |
| 160333372   | lumican                                                                                 | LHINYNNLTESVGPLPK                  | 6.1   | 955.5  | 48.5%      | 38.2     |
| 148747546   | serine protease inhibitor A3K                                                           | NLINDYVSNQTOGMK                    | 4.0   | 928.4  | 82.3%      | 46.6     |
| 7305235     | leukemia inhibitory factor receptor 1                                                   | KVPSNSTETVIESDQFQPGVR              | 5.4   | 773.7  | 28.2%      | 122.5    |
| 46560582    | epidermal growth factor receptor 1                                                      | DTLSINATNIK                        | 3.3   | 595.8  | 23.1%      | 134.8    |
| 244791354   | phosphatidylcholine-sterol acyltransferase                                              | QSQPVHLLPMNETDHLNMVFSNK            | 4.0   | 679.1  | 21.5%      | 49.7     |
| 51172612    | vitamin D-binding protein                                                               | ICQNLSK                            | 2.1   | 432.2  | 20.4%      | 53.6     |
| 31981720    | protein Z-dependent protease inhibitor                                                  | EGNFTSTFDKK                        | 2.7   | 425.5  | 43.1%      | 51.8     |
| 110347406   | complement factor I                                                                     | FSHNGTCAAEGK                       | 3.4   | 427.2  | 32.0%      | 67.2     |
| 6680856     | corticosteroid-binding globulin                                                         | EEDFYVNETSTVK                      | 3.1   | 781.4  | 42.8%      | 44.7     |
| 6754164     | complement C5                                                                           | AFNECCTIANK                        | 3.2   | 664.8  | 25.2%      | 188.8    |
| 6755112     | phospholipid transfer protein                                                           | VSNVSCASVSK                        | 3.6   | 634.3  | 23.7%      | 54.4     |
| 449083339   | fibronectin                                                                             | LDAPTNLQFVNETDRTVLVTWTPPR          | 4.7   | 962.5  | 22.5%      | 260.0    |
| 160358825   | beta-2-glycoprotein 1                                                                   | DYRPSAGNNSLYQDVTVFK                | 5.6   | 726.0  | 51.0%      | 38.6     |
| 157057194   | calcium channel, voltage-dependent, alpha 1I                                            | QDLNASGLCVNWNR                     | 1.7   | 824.3  | 4.1%       | 242.7    |
| 8850219     | haptoglobin                                                                             | CVVHYENSTVPEK                      | 4.8   | 521.6  | 59.9%      | 38.7     |
| 8850219     | haptoglobin                                                                             | CVVHYENSTVPEKK                     | 4.5   | 564.3  | 59.9%      | 38.7     |
| 8850219     | haptoglobin                                                                             | NLFLNHSETASAK                      | 4.2   | 478.2  | 59.9%      | 38.7     |
| 109627652   | complement factor H                                                                     | LTEFTHNSTMDYK                      | 3.6   | 802.4  | 27.2%      | 141.2    |
| 100815972   | gamma-glutamyl hydrolase                                                                | LPLNFTEGAR                         | 2.5   | 559.8  | 26.2%      | 35.4     |
| 6680856     | corticosteroid-binding globulin                                                         | DLFTNQSDFADTTK                     | 4.0   | 802.4  | 42.8%      | 44.7     |
| 124249351   | inter-alpha-trypsin inhibitor heavy chain H1                                            | TEGEERANLSSQVLK                    | 2.1   | 554.6  | 21.6%      | 101.0    |

| WT 1        | WT 2        | WT 3        | WT 4       | WT 5       | WT 6       | WT 7       | WT 8        | WT 9       | WT 10      | AVG_WT     | StdDev_WT  |
|-------------|-------------|-------------|------------|------------|------------|------------|-------------|------------|------------|------------|------------|
| 77879670    | 11803109    | 6201350     | 5602795    | 60888998   | 127471545  | 54314220   | 91351793    | 79505932   | 82304343   | 59732376   | 40745395   |
| 582221      | 7928140     | 6875898     | 12245857   | 6979313    | 10244442   | 820290     | 376564      | 0          | 5364261    | 5141699    | 4463582    |
| 83347520    | 102932676   | 32963782    | 14576889   | 33550102   | 68722842   | 43772597   | 97956084    | 105651252  | 68613287   | 65208703   | 32573225   |
| 32512156    | 15487793    | 11985213    | 30734      | 35809219   | 45081605   | 35017153   | 76897872    | 79045628   | 118205965  | 45007334   | 36299608   |
| 2667835     | 57461524    | 36060955    | 22210753   | 45102460   | 38181250   | 20404136   | 13585080    | 276652     | 23045703   | 25899635   | 18314679   |
| 30163567    | 14331213    | 10109858    | 992682     | 37512193   | 40724668   | 29419771   | 66075435    | 71577176   | 88058420   | 38896498   | 28409251   |
| 33427372    | 30879996    | 21985699    | 15152151   | 12398032   | 10856151   | 4376936    | 24650676    | 7591308    | 5003558    | 16632188   | 10533910   |
| 37967270    | 0           | 6382664     | 2013138    | 15067272   | 36897836   | 30773408   | 53778821    | 97070568   | 51666476   | 33161745   | 29831095   |
| 9378569     | 4284893     | 6816777     | 1881649    | 4339481    | 7045439    | 6521819    | 4700979     | 671222     | 628664     | 4626949    | 2909538    |
| 10671334    | 2241842     | 8111876     | 2356822    | 36624779   | 1798032    | 13540251   | 12044772    | 22932461   | 14554555   | 12487672   | 10757921   |
| 28818223    | 28873795    | 14298266    | 1055741    | 264502     | 5437068    | 7151034    | 11453385    | 13893837   | 12710870   | 12395672   | 9998711    |
| 17097202    | 0           | 1084983     | 608230     | 1086269    | 433594     | 31389195   | 77172468    | 63048054   | 56643185   | 24856318   | 30260431   |
| 38865092    | 2204250     | 21282192    | 2482138    | 24031203   | 37193869   | 46359667   | 79643298    | 47627450   | 41987115   | 34167627   | 23057000   |
| 11022357    | 0           | 0           | 286007     | 0          | 11047936   | 10820635   | 11810179    | 15556055   | 873236     | 6141641    | 6374894    |
| 53612999    | 2028431     | 0           | 424529     | 27444761   | 92693886   | 109675577  | 91447258    | 192782370  | 164682927  | 73479274   | 69048151   |
| 83862822    | 8191530     | 98073695    | 24380140   | 26594275   | 1952730    | 48887970   | 134075952   | 86606492   | 62893785   | 57551939   | 43107661   |
| 16729116    | 1045948     | 2137323     | 2172907    | 2687968    | 29455198   | 36035495   | 41852948    | 39487967   | 48049619   | 21965449   | 19027941   |
| 24560       | 29552       | 64886       | 11223      | 39759      | 36229      | 26267      | 43163       | 0          | 45045      | 32068      | 18270      |
| 172053921   | 93134635    | 169045456   | 114844346  | 209594716  | 103349679  | 84672181   | 166867504   | 94352274   | 95430459   | 130334517  | 44479591   |
| 123929468   | 32164466    | 69388735    | 47482307   | 73227861   | 98118586   | 83300929   | 222970391   | 131379260  | 140294272  | 102225628  | 55326357   |
| 89522243    | 4545691     | 13029768    | 7277052    | 97658971   | 45978993   | 30911408   | 96094139    | 37576344   | 43974245   | 46656885   | 36017948   |
| 119650281   | 23437867    | 18588630    | 10498581   | 61935210   | 149808128  | 104796014  | 115689505   | 128298692  | 101141728  | 83384464   | 50691341   |
| 84612093    | 11067753    | 15885638    | 35796172   | 206530     | 36019837   | 33965334   | 122797659   | 46666141   | 48255704   | 43527286   | 36371382   |
| 72249345    | 0           | 6236356     | 2382363    | 5727638    | 60203218   | 27736130   | 86574419    | 55788685   | 50546483   | 36744464   | 32235177   |
| 47790743    | 308572      | 0           | 4958032    | 5291919    | 61506129   | 46122150   | 64067933    | 78495698   | 70167761   | 37870894   | 31788602   |
| 2055864673  | 298926021   | 852458497   | 1136837643 | 970416098  | 1156324749 | 924163014  | 1985840965  | 1075229526 | 963367537  | 1141942872 | 522315133  |
| 331384717   | 390103837   | 107269167   | 53698795   | 229923069  | 1055221400 | 618352682  | 735842598   | 892276625  | 936845923  | 535091881  | 361658664  |
| 687004835   | 304612409   | 603895295   | 130951358  | 151919195  | 422465031  | 393761075  | 995730818   | 343160381  | 311981966  | 434548236  | 262774943  |
| 66277504    | 253273      | 2001103     | 11119295   | 27762949   | 46861592   | 24619849   | 78731471    | 37501857   | 33600356   | 32872925   | 25865180   |
| 56889632    | 67566830    | 60610168    | 27652568   | 40241928   | 68767163   | 85585845   | 83762878    | 65752509   | 49606503   | 60643602   | 18065278   |
| 194089337   | 175899646   | 142695712   | 46863718   | 97521355   | 146392805  | 96296984   | 212025364   | 146087986  | 96849789   | 135472269  | 51134882   |
| 50975370    | 76351724    | 68105398    | 34492215   | 56210004   | 97320047   | 76169810   | 109781564   | 58438446   | 56581685   | 68442626   | 22393770   |
| 932203673   | 3856759995  | 3925848849  | 863373467  | 1204326873 | 2374680473 | 1939440587 | 2696901687  | 4779297641 | 3353397112 | 2592623036 | 1370139467 |
| 174172051   | 87345083    | 101655867   | 47079443   | 84148920   | 83408863   | 60392581   | 147860350   | 65368728   | 45365529   | 89679742   | 42124186   |
| 55338959    | 30775467    | 24269923    | 17895463   | 40685130   | 106382597  | 63136345   | 55263066    | 67817082   | 76528490   | 53809252   | 26735241   |
| 5846184     | 771622      | 595062      | 0          | 15355304   | 9013663    | 4508186    | 38971735    | 28070224   | 26758151   | 12989013   | 13776269   |
| 5501163205  | 707597149   | 738269633   | 1266134983 | 1625882885 | 7581905700 | 4151891577 | 10094890998 | 5612715294 | 5300346480 | 4258079790 | 3170510966 |
| 633375      | 159873610   | 123220761   | 39192146   | 100046295  | 32765273   | 0          | 0           | 2577447    | 460911     | 45876982   | 59927788   |
| 2381270630  | 2790224996  | 1942623380  | 422283154  | 18012720   | 2295216    | 5439680    | 1104352266  | 46890116   | 1063017    | 871445518  | 1107343877 |
| 343664351   | 728450375   | 493071266   | 88381926   | 258090     | 0          | 0          | 180327923   | 2655021    | 0          | 183680895  | 257080691  |
| 11588500849 | 19013184463 | 10210120520 | 6495738258 | 1974728353 | 174953189  | 510231846  | 13511496284 | 1870004402 | 35385362   | 6538434353 | 6707985885 |
| 647111220   | 1255502876  | 998558536   | 336794032  | 498060157  | 691783110  | 505640785  | 1024225319  | 539712388  | 437915255  | 693530368  | 300026516  |
| 4175692     | 52225387    | 47709673    | 22485207   | 29086676   | 28453723   | 6280539    | 0           | 4852775    | 1963909    | 19723358   | 19319296   |
| 35274226    | 89034680    | 86301937    | 437828580  | 17833900   | 451941676  | 111541748  | 165233990   | 362202254  | 236877786  | 199407078  | 164078649  |
| 9014008     | 4008484     | 11551718    | 3650606    | 875477     | 12139185   | 17149671   | 29226585    | 6822083    | 3863055    | 9830087    | 8404219    |

| Null 1     | Null 2     | Null 3     | Null 4      | Null 5     | Null 6     | Null 7     | Null 8     | Null 9     | Null 10    | AVG_Null   | StdDev_Null | p value | Null/WT |
|------------|------------|------------|-------------|------------|------------|------------|------------|------------|------------|------------|-------------|---------|---------|
| 0.00       | 0.00       | 0.00       | 0.00        | 0.00       | 0.00       | 0.00       | 0.00       | 0.00       | 0.00       | 0.00       | 0.00        | 0.0002  | 0.00    |
| 0          | 3962937    | 241848     | 5962392     | 489633     | 532649     | 0          | 141551     | 0          | 0          | 1133101    | 2082141     | 0.0191  | 0.22    |
| 29678524   | 24810400   | 23924390   | 21265553    | 14066100   | 19897502   | 35900210   | 23597396   | 28158729   | 20443467   | 24174227   | 6030622     | 0.0010  | 0.37    |
| 36229905   | 9543385    | 21176412   | 13312914    | 21586020   | 27404271   | 17498255   | 5800552    | 8155861    | 12735012   | 17344259   | 9466945     | 0.0315  | 0.39    |
| 16505328   | 4626207    | 6082734    | 8784715     | 7917345    | 9727359    | 9715068    | 9562111    | 27109058   | 9650278    | 10968020   | 6465078     | 0.0257  | 0.42    |
| 33560147   | 8332553    | 20115055   | 19046456    | 18520536   | 29122683   | 12070873   | 6614375    | 7636940    | 10497219   | 16551684   | 9265388     | 0.0295  | 0.43    |
| 15444627   | 8036908    | 11620465   | 9406179     | 6420333    | 7040609    | 2822350    | 2536267    | 4847093    | 4487548    | 7266238    | 4048034     | 0.0172  | 0.44    |
| 84448830   | 65798410   | 206935358  | 134710492   | 333675338  | 109597165  | 73560432   | 81316581   | 53242647   | 68954282   | 121223953  | 87204416    | 0.0073  | 3.66    |
| 8514273    | 17182059   | 17623815   | 19249969    | 5224690    | 16933918   | 21394994   | 20466602   | 11204955   | 25994416   | 16378969   | 6307959     | 0.0000  | 3.54    |
| 23057636   | 36984852   | 74599567   | 40950470    | 76172488   | 36130482   | 12881823   | 21051091   | 25145197   | 20181015   | 36715462   | 22155066    | 0.0060  | 2.94    |
| 58339245   | 30058380   | 63866147   | 51651433    | 80648167   | 21085645   | 11801011   | 8416649    | 5372846    | 8682382    | 33992191   | 27410714    | 0.0310  | 2.74    |
| 100388236  | 85083031   | 78095515   | 81316518    | 44721035   | 21580772   | 61927648   | 62890387   | 57365936   | 76937249   | 67030633   | 22517337    | 0.0024  | 2.70    |
| 60581429   | 94519376   | 149300359  | 121130464   | 68733456   | 52292960   | 24431116   | 173297682  | 27641895   | 25162260   | 79709100   | 53246621    | 0.0232  | 2.33    |
| 0          | 17753013   | 9066867    | 29995797    | 5597427    | 16215221   | 18634389   | 18607874   | 11463168   | 12609060   | 13994282   | 8279002     | 0.0288  | 2.28    |
| 219678301  | 118247105  | 163760395  | 177013818   | 191047617  | 192375134  | 156139497  | 197833409  | 120012071  | 135251152  | 167135850  | 34591465    | 0.0012  | 2.27    |
| 164491456  | 186559523  | 204491162  | 237235484   | 124565044  | 54459357   | 69849979   | 102067781  | 79930050   | 78136888   | 130178672  | 63916305    | 0.0080  | 2.26    |
| 25080827   | 46495389   | 62467873   | 56312811    | 47880135   | 54163918   | 58323900   | 54701050   | 47725646   | 42798708   | 49595026   | 10525933    | 0.0008  | 2.26    |
| 48285      | 132600     | 27724      | 102928      | 70200      | 65081      | 68300      | 9135       | 32794      | 129359     | 68641      | 42009       | 0.0212  | 2.14    |
| 322032095  | 248624038  | 400189426  | 299613896   | 517099224  | 134617268  | 301299234  | 104500738  | 119152239  | 258618957  | 270574712  | 129798121   | 0.0046  | 2.08    |
| 474240948  | 233781569  | 324172746  | 180319980   | 199240943  | 130508609  | 114073336  | 111906233  | 184846954  | 111972079  | 206506340  | 115318016   | 0.0189  | 2.02    |
| 107583524  | 115728270  | 63087621   | 216607388   | 128688447  | 65482273   | 74153961   | 56165353   | 53232734   | 37547387   | 91827696   | 53007683    | 0.0388  | 1.97    |
| 135088492  | 196978168  | 78171260   | 211061391   | 134412666  | 210278959  | 159355059  | 176387375  | 163108511  | 151325269  | 161616715  | 40553942    | 0.0013  | 1.94    |
| 102324529  | 75928255   | 87485165   | 131893359   | 96037394   | 94496204   | 50509307   | 40580725   | 111904362  | 41110297   | 83226960   | 30877887    | 0.0169  | 1.91    |
| 68494300   | 83224907   | 96087863   | 115138809   | 74268715   | 79333633   | 44907756   | 44388917   | 48097923   | 47763517   | 70170634   | 24175313    | 0.0172  | 1.91    |
| 101740082  | 77676792   | 71171261   | 98618927    | 83457916   | 62354100   | 49298817   | 61388730   | 41997681   | 52281498   | 69998580   | 20350059    | 0.0149  | 1.85    |
| 2225653155 | 2171130777 | 3908972181 | 3115215351  | 2129452121 | 1325122354 | 1465992327 | 1320970884 | 1107566428 | 888467634  | 1965854321 | 954918856   | 0.0278  | 1.72    |
| 1113579018 | 882668953  | 1093255591 | 1168148273  | 841088847  | 721346835  | 760715433  | 990298691  | 711071267  | 711916388  | 899408930  | 179250018   | 0.0105  | 1.68    |
| 1017955992 | 719482357  | 1064311890 | 858413467   | 1113051601 | 534741997  | 441169308  | 430645165  | 577076430  | 445669492  | 720251770  | 273344230   | 0.0284  | 1.66    |
| 50728388   | 52453972   | 53420607   | 70161688    | 40549519   | 73245026   | 60882117   | 54311319   | 50431061   | 35289223   | 54147292   | 11718883    | 0.0292  | 1.65    |
| 44710576   | 48513221   | 76817045   | 53504680    | 37286630   | 30190771   | 29580299   | 25428306   | 26588051   | 46621106   | 41924069   | 15789316    | 0.0239  | 0.69    |
| 62623747   | 63361682   | 79323599   | 76347875    | 58833465   | 134047876  | 82568518   | 83071242   | 102600647  | 90579261   | 83335791   | 22333889    | 0.0085  | 0.62    |
| 44214426   | 48427229   | 52078974   | 46974861    | 32833998   | 38246298   | 38658162   | 31182736   | 34034684   | 42441470   | 40909284   | 7075619     | 0.0016  | 0.60    |
| 866090422  | 1042217660 | 1145380976 | 1506014524  | 1085203265 | 2157739662 | 1901256019 | 1824328031 | 1852440137 | 1895172992 | 1527584369 | 457145306   | 0.0315  | 0.59    |
| 58031138   | 67418985   | 90213667   | 66363132    | 47091645   | 46639943   | 31610401   | 29286065   | 33924313   | 28553100   | 49913239   | 20434519    | 0.0151  | 0.56    |
| 33258720   | 42459934   | 59336797   | 46532177    | 33112733   | 25327508   | 22431373   | 21516556   | 20452175   | 32082287   | 33651026   | 12573345    | 0.0447  | 0.63    |
| 8332298    | 69414      | 7169170    | 1808143     | 2862972    | 4958811    | 2466167    | 2204229    | 497062     | 1161726    | 3152999    | 2789027     | 0.0401  | 0.24    |
| 8421901009 | 7247546596 | 8814998029 | 10811884096 | 6623475644 | 7461676866 | 5155399135 | 4196341559 | 4320908486 | 4812167577 | 6786629900 | 2186692154  | 0.0525  | 1.59    |
| 6706358    | 20592571   | 0          | 360625      | 11141175   | 6221758    | 0          | 856039     | 3560828    | 1999253    | 5143861    | 6538872     | 0.0466  | 0.11    |
| 2012949    | 372462     | 751997     | 126074      | 357671     | 158097293  | 132037651  | 162639908  | 162596069  | 629293454  | 124828553  | 193077817   | 0.0500  | 0.14    |
| 0          | 0          | 0          | 0           | 0          | 20659800   | 20917269   | 8145965    | 13146247   | 65675427   | 12854471   | 20451644    | 0.0506  | 0.07    |
| 127593232  | 39175956   | 36107837   | 69011602    | 36360564   | 7093958867 | 2282191785 | 2059345627 | 3702930875 | 4041242254 | 1948791860 | 2400560081  | 0.0566  | 0.30    |
| 465158104  | 499361753  | 470199604  | 589187054   | 352878542  | 588889894  | 551190038  | 505587914  | 353175462  | 534869179  | 491049754  | 84476674    | 0.0548  | 0.71    |
| 1555474    | 722565     | 4252074    | 10813321    | 15101750   | 12562476   | 9554012    | 5559711    | 2537125    | 7243100    | 6990161    | 4902311     | 0.0585  | 0.35    |
| 52539680   | 68112882   | 84392048   | 139249476   | 51186044   | 152692743  | 80158285   | 99583369   | 100204658  | 121959084  | 95007827   | 34704498    | 0.0646  | 0.48    |
| 6575306    | 1501083    | 2381468    | 1567085     | 4994898    | 13106179   | 909712     | 7233030    | 2671970    | 1342838    | 4228357    | 3853323     | 0.0714  | 0.43    |

| Accession # | Protein                                                        | PEPTIDE                               | Xcorr | MZ     | % Coverage | MW [kDa] |
|-------------|----------------------------------------------------------------|---------------------------------------|-------|--------|------------|----------|
| 110347469   | alpha-2-macroglobulin                                          | VNLSFPSAQSLPASDTHLK                   | 5.2   | 671.7  | 48.7%      | 165.7    |
| 8850219     | haptoglobin                                                    | CVVHYENSTVPEKK                        | 3.9   | 545.3  | 59.9%      | 38.7     |
| 6680586     | serine protease inhibitor A3C                                  | YKGNASALFILPDOGR                      | 1.8   | 876.0  | 18.7%      | 46.7     |
| 31982171    | murinoglobulin-1                                               | SLGNVNFVSVAEAQSSSEPCGSEVATVPETGRK     | 4.8   | 1142.2 | 43.6%      | 165.2    |
| 124487013   | carboxylesterase 1B                                            | FHSDLNISESLPIAVIEK                    | 5.0   | 671.7  | 19.1%      | 62.2     |
| 8850219     | haptoglobin                                                    | KNLTSPVGVQPILNEHTFCAGLTK              | 7.4   | 875.8  | 59.9%      | 38.7     |
| 6679182     | alpha-1-acid glycoprotein 1                                    | ENGTFISK                              | 1.9   | 392.2  | 48.8%      | 23.9     |
| 31981720    | protein Z-dependent protease inhibitor                         | EGNFTSTFDK                            | 2.2   | 573.8  | 43.1%      | 51.8     |
| 20330802    | serotransferrin                                                | FDEFFSQGCAPGYEKNSTLCDLCIGPLK          | 5.4   | 1085.5 | 66.4%      | 76.7     |
| 31982171    | murinoglobulin-1                                               | SLGNVNFVSVAEAQSSSEPCGSEVATVPETGR      | 5.7   | 1099.5 | 43.6%      | 165.2    |
| 31982712    | carboxypeptidase B2                                            | AHLNVSRR                              | 2.4   | 399.2  | 25.1%      | 48.8     |
| 161702988   | apolipoprotein B                                               | ESMNFSKK                              | 1.9   | 473.7  | 23.8%      | 509.1    |
| 214010170   | clusterin                                                      | RNSTGCLK                              | 1.8   | 468.7  | 36.6%      | 51.6     |
| 6679182     | alpha-1-acid glycoprotein 1                                    | ESQTIGDQCVYNSTHLGFQR                  | 4.5   | 762.4  | 48.8%      | 23.9     |
| 8850219     | haptoglobin                                                    | CVVHYENSTVPEK                         | 2.7   | 502.6  | 59.9%      | 38.7     |
| 170172530   | immunoglobulin J chain                                         | ENISDPTSPLR                           | 3.0   | 615.3  | 49.7%      | 18.0     |
| 147904569   | carboxypeptidase N                                             | LSLDSNNLTALHPALFHLSR                  | 2.8   | 778.7  | 28.3%      | 60.4     |
| 46559389    | angiotensin-converting enzyme 1                                | TFDVSNFQNSSIK                         | 3.2   | 744.4  | 15.6%      | 150.8    |
| 7305235     | leukemia inhibitory factor receptor 1                          | ILSYNVSCSLNEETQSVLEIFDPQHR            | 4.2   | 1027.2 | 28.2%      | 122.5    |
| 31981720    | protein Z-dependent protease inhibitor                         | ETYFNLSK                              | 1.7   | 501.7  | 43.1%      | 51.8     |
| 160333372   | lumican                                                        | KLHINYNNLTESVGPLPK                    | 5.5   | 510.5  | 48.5%      | 38.2     |
| 148232950   | carboxypeptidase Q                                             | EVMNLLQPLNVTK                         | 3.3   | 758.4  | 12.3%      | 51.8     |
| 16418335    | leucine-rich alpha-2-glycoprotein                              | MFSQNDTR                              | 2.6   | 508.2  | 18.7%      | 37.4     |
| 12963497    | kininogen-1 2                                                  | EGNCSAQSGLAWQDCDFKDAEEAATGECTATVGK    | 3.8   | 1222.2 | 45.1%      | 47.9     |
| 6754950     | alpha-1-acid glycoprotein 2                                    | TQMVFVNLTPLNINDTMELR                  | 3.4   | 810.7  | 35.8%      | 23.8     |
| 54112422    | mannan-binding lectin serine protease 2 1                      | GDSGGALVFLDNETQR                      | 4.5   | 840.4  | 16.9%      | 75.5     |
| 237874259   | polypeptide N-acetylgalactosaminyltransferase 1                | INQFNLMASEMIALNR                      | 2.3   | 949.5  | 6.1%       | 64.2     |
| 31981720    | protein Z-dependent protease inhibitor                         | ETYFNLSKK                             | 2.0   | 377.5  | 43.1%      | 51.8     |
| 7305235     | leukemia inhibitory factor receptor 1                          | LGVQMHPGQEIHNFTLTGR                   | 6.0   | 718.0  | 28.2%      | 122.5    |
| 31982171    | murinoglobulin-1                                               | EVNSQLDNNGCSTQEVNITELQSK              | 4.7   | 884.4  | 43.6%      | 165.2    |
| 7304875     | alpha-2-HS-glycoprotein 1                                      | CPLLTPEFNDTNVVHTVNTALAAFNTQNGTYFK     | 4.5   | 1228.6 | 46.7%      | 37.3     |
| 20330802    | serotransferrin                                                | NSTLCDLCIGPLK                         | 3.2   | 746.4  | 66.4%      | 76.7     |
| 111378397   | phosphatidylinositol-glycan-specific phospholipase D           | VNGTLTQVLLVGAPTHDDVSK                 | 5.5   | 722.4  | 27.3%      | 93.6     |
| 160358829   | hemopexin                                                      | SLGPNTCSSNGSSLYFIHGPNLYCYSSIDK        | 4.7   | 1113.8 | 54.1%      | 51.3     |
| 148747546   | serine protease inhibitor A3K                                  | FNLTTETPEADIHQFGNLLQSLSQPEDQDQINIGNAM | 4.0   | 1541.1 | 82.3%      | 46.6     |
| 148277039   | alpha-2-macroglobulin-P                                        | SLGNVNFTVSAEALDSK                     | 3.4   | 877.4  | 18.3%      | 164.2    |
| 12963497    | kininogen-1 2                                                  | EGNCSAQSGLAWQDCDFK                    | 4.1   | 1037.4 | 45.1%      | 47.9     |
| 33859809    | fibrinogen beta chain                                          | GTAGNALMDGASQLVGENR                   | 4.7   | 931.4  | 69.9%      | 54.7     |
| 422010931   | complement component C8 gamma chain 2                          | EANLTEDQILFFPK                        | 4.0   | 833.4  | 35.1%      | 18.9     |
| 6754950     | alpha-1-acid glycoprotein 2                                    | TQMVFVNLTPLNINDTMELR                  | 3.6   | 811.1  | 35.8%      | 23.8     |
| 6678085     | alpha-1-antitrypsin 1-4                                        | ELVHQSNTSNIFFSPVSIATAFAMLSLGSK        | 6.7   | 1071.9 | 81.4%      | 46.0     |
| 68131562    | sulfhydryl oxidase 1 a                                         | NGSGATLPGAGANVQTLR                    | 5.1   | 842.9  | 20.1%      | 82.7     |
| 8850219     | haptoglobin                                                    | NLTSPVGVQPILNEHTFCAGLTK               | 4.1   | 833.8  | 59.9%      | 38.7     |
| 6680684     | protein AMBP                                                   | KEDSCQLNYSEGPCPLGMQER                 | 5.4   | 806.7  | 22.6%      | 39.0     |
| 33563297    | complement component C8 beta chain                             | THMNFNTSGFK                           | 3.5   | 445.2  | 34.5%      | 66.2     |
| 113722129   | Kazal type serine protease inhibitor 5-like 2                  | VNLSWFNKTVDPCPDLK                     | 1.8   | 1018.0 | 17.7%      | 11.0     |
| 6753556     | cathepsin D                                                    | YYHGELSYLVNTR                         | 2.7   | 539.3  | 5.4%       | 44.9     |
| 9966766     | disintegrin and metalloproteinase domain-containing protein 21 | SASHNCYKEINLOGNR                      | 1.8   | 947.4  | 13.3%      | 80.8     |

| WT 1       | WT 2       | WT 3       | WT 4      | WT 5       | WT 6      | WT 7      | WT 8       | WT 9       | WT 10      | AVG_WT    | StdDev_WT |
|------------|------------|------------|-----------|------------|-----------|-----------|------------|------------|------------|-----------|-----------|
| 365109227  | 111677730  | 170196953  | 191468127 | 174785983  | 231024043 | 114203384 | 285758533  | 336103099  | 334288582  | 231461566 | 93687360  |
| 14510994   | 47534204   | 17495835   | 5774989   | 3935188    | 2072097   | 13102028  | 13073493   | 10483416   | 1902374    | 12988462  | 13326676  |
| 18575164   | 29170654   | 37132889   | 0         | 28795199   | 20017256  | 10256586  | 37650156   | 10314700   | 10358439   | 20227104  | 12691790  |
| 87717252   | 0          | 0          | 0         | 17590283   | 32636667  | 38026604  | 112803254  | 140292285  | 64715965   | 49378231  | 50252106  |
| 225572161  | 66091978   | 109318604  | 221113227 | 159494622  | 165654791 | 85402799  | 260424626  | 227774849  | 174191197  | 169503885 | 65824275  |
| 76302643   | 1686651    | 66414826   | 154694507 | 0          | 0         | 727494    | 62919187   | 1638872    | 0          | 36438418  | 52547031  |
| 160147103  | 577479912  | 322759362  | 123373266 | 71201914   | 162763542 | 149765977 | 511209000  | 99493473   | 110565884  | 228875943 | 180164331 |
| 404872784  | 511436414  | 443465860  | 116517190 | 125792947  | 175770160 | 195814718 | 551120792  | 201224425  | 156139506  | 288215480 | 169546170 |
| 259199566  | 181514971  | 114543485  | 4740391   | 130295587  | 578661362 | 333696574 | 640737215  | 844216776  | 536092100  | 362369803 | 273653520 |
| 836806844  | 22694430   | 6826054    | 12226129  | 1242522868 | 466213766 | 476136649 | 1676327488 | 1491757879 | 899712003  | 713122411 | 618990454 |
| 43394154   | 97801218   | 64193959   | 18061678  | 20268034   | 30785027  | 29810078  | 75789632   | 15871304   | 16569100   | 41254418  | 28662020  |
| 4842399    | 6635856    | 2364857    | 2986963   | 3129503    | 7389111   | 8644696   | 16968433   | 3746668    | 4884679    | 6159316   | 4315025   |
| 10540343   | 22185236   | 18985589   | 8070997   | 8775351    | 13057535  | 6408899   | 16180178   | 6989019    | 8085541    | 11927869  | 5484697   |
| 53467797   | 388671859  | 292457026  | 85339875  | 15381588   | 24878516  | 2223649   | 12528094   | 12519678   | 14440388   | 90190847  | 136127977 |
| 44767979   | 177767394  | 134742335  | 16777865  | 9907358    | 11412055  | 6288633   | 35262183   | 8847379    | 12061193   | 45783437  | 60384222  |
| 597780027  | 114945169  | 192221807  | 137106113 | 223004371  | 331374509 | 230580831 | 480956775  | 905085176  | 161743461  | 337479824 | 253144979 |
| 1459589009 | 26615979   | 338864619  | 117823400 | 1144362174 | 564955770 | 461101189 | 718578480  | 962420906  | 773793383  | 656810491 | 450744964 |
| 29350475   | 9133562    | 8253419    | 12219286  | 12885975   | 20470378  | 17841247  | 66234449   | 18849768   | 19189079   | 21442764  | 16925696  |
| 46405983   | 26798837   | 9266877    | 3313506   | 2076697    | 16490878  | 28171828  | 73743364   | 93307854   | 49946348   | 34952217  | 30661165  |
| 479603909  | 370685764  | 306642805  | 134570287 | 98645016   | 166582348 | 188270868 | 589194346  | 226225907  | 142671385  | 270309263 | 163471213 |
| 4682453    | 212204     | 0          | 0         | 332889     | 14363273  | 36367864  | 46978880   | 76959564   | 51354332   | 23125146  | 27829520  |
| 81984969   | 1713965    | 2580573    | 6633035   | 4763617    | 160996907 | 125159796 | 132486608  | 178437312  | 164530061  | 85928684  | 75283264  |
| 758444311  | 1563220569 | 1231185245 | 331386100 | 167275208  | 281938771 | 321582687 | 739896184  | 93521551   | 92419014   | 558086964 | 506133424 |
| 0          | 0          | 0          | 0         | 16115199   | 6750122   | 1729237   | 22973776   | 27609560   | 5251145    | 8042904   | 10429806  |
| 5284280    | 33570894   | 9309168    | 659943    | 2747013    | 2276544   | 1086215   | 35424104   | 5497037    | 2711469    | 9856667   | 13236444  |
| 108543662  | 15770503   | 29518378   | 17695946  | 24458562   | 110946711 | 115743788 | 227197843  | 154318868  | 157633534  | 96182779  | 72486909  |
| 117648358  | 6459984    | 7875382    | 10759295  | 55582176   | 41978530  | 75878641  | 99742574   | 70156506   | 43213893   | 52929534  | 38575174  |
| 5546507    | 0          | 361278     | 223144    | 2178747    | 4509263   | 2784440   | 26077016   | 13275477   | 16776252   | 7173212   | 8736383   |
| 136937433  | 5516567    | 86495755   | 4843232   | 28689587   | 220700589 | 272307881 | 299207509  | 380908883  | 336185113  | 177179255 | 142860829 |
| 0          | 18084336   | 34989225   | 13855096  | 68240157   | 0         | 160863    | 2251456    | 437293     | 1232839    | 13925126  | 22280251  |
| 7688178    | 1102061    | 8086604    | 1717766   | 11255698   | 7465391   | 19456051  | 41031766   | 32238463   | 17147594   | 14718957  | 13081431  |
| 459724039  | 29403255   | 32022239   | 9258709   | 8155522    | 633479008 | 589065458 | 1970807843 | 1146619971 | 1661249106 | 653978515 | 718282882 |
| 6357659    | 0          | 4543492    | 2717464   | 0          | 2239385   | 106429    | 7244527    | 1142240    | 625499     | 2497670   | 2692985   |
| 138299737  | 641496     | 86415123   | 0         | 84018104   | 61390817  | 39373201  | 275542973  | 140925343  | 54875507   | 88148230  | 81695250  |
| 808503018  | 815466795  | 331866274  | 0         | 71396294   | 115286901 | 153658512 | 1170958087 | 772901016  | 318805016  | 455884191 | 403133475 |
| 1884709    | 210696036  | 211479934  | 5003181   | 54641364   | 2464300   | 8201831   | 5063726    | 11686864   | 10670404   | 52179235  | 85149244  |
| 0          | 2387924    | 991883     | 1002780   | 14450422   | 14040867  | 8174663   | 73080559   | 56010417   | 16930017   | 18706953  | 25266440  |
| 0          | 75417138   | 71919162   | 55963808  | 86977717   | 28375430  | 15212212  | 0          | 0          | 20719154   | 35458462  | 34075107  |
| 428536574  | 197175712  | 262592752  | 294818    | 416012361  | 317176824 | 258298291 | 738338129  | 230714476  | 159196140  | 300833608 | 197363034 |
| 3728000    | 82430651   | 21992383   | 296304907 | 0          | 1196136   | 379555    | 119307502  | 2242876    | 142476     | 52772449  | 95149336  |
| 458357359  | 319426770  | 67725871   | 0         | 15460314   | 67552691  | 162670648 | 582371397  | 581299723  | 361465056  | 261632983 | 228808623 |
| 129162927  | 67419013   | 24560317   | 110728873 | 10499339   | 84900323  | 115073512 | 174257901  | 98694682   | 138628168  | 95392505  | 50530096  |
| 60063374   | 547887     | 31148682   | 317375    | 0          | 0         | 203753    | 54389657   | 2064838    | 4053820    | 15278939  | 24089564  |
| 86469381   | 37594245   | 23624072   | 7604960   | 18009744   | 61368979  | 47207902  | 198754562  | 78908331   | 29782946   | 58932512  | 55489555  |
| 259360836  | 63589158   | 61573713   | 21331815  | 98969021   | 193001432 | 119269880 | 293986920  | 74365298   | 55725164   | 124117324 | 92999652  |
| 11282985   | 7443376    | 12796130   | 1829562   | 69687735   | 2089965   | 35894581  | 101036688  | 24192651   | 0          | 26625367  | 33670894  |
| 19896765   | 61459920   | 5610873    | 2273717   | 2662334    | 31370042  | 24671269  | 35296829   | 44036713   | 74185779   | 30146424  | 24518141  |
| 7876461    | 296480328  | 247963808  | 169874135 | 330937121  | 104090928 | 17957143  | 22523425   | 10769021   | 11384586   | 121985696 | 129499224 |



| Null 1     | Null 2    | Null 3     | Null 4     | Null 5     | Null 6     | Null 7    | Null 8    | Null 9    | Null 10   | AVG_Null   | StdDev_Null | p value | Null/WT |
|------------|-----------|------------|------------|------------|------------|-----------|-----------|-----------|-----------|------------|-------------|---------|---------|
| 204679752  | 181760022 | 137191968  | 210629489  | 163824654  | 102809786  | 153238895 | 221734215 | 132545223 | 191130857 | 169954486  | 38625671    | 0.0709  | 0.73    |
| 5416342    | 2591782   | 10785775   | 7760755    | 2364833    | 4613234    | 2831730   | 2418214   | 2304035   | 4439781   | 4552648    | 2810918     | 0.0658  | 0.35    |
| 5517711    | 12814340  | 12880527   | 20436419   | 10139278   | 7733142    | 12184737  | 15180381  | 9358711   | 15218759  | 12146400   | 4263169     | 0.0724  | 0.60    |
| 145293250  | 65791081  | 118609507  | 153293955  | 81119501   | 62812577   | 70118227  | 38813419  | 64144081  | 62949690  | 86294529   | 38822039    | 0.0826  | 1.75    |
| 182698152  | 158796994 | 146886736  | 149200725  | 127828825  | 79545943   | 99459636  | 113767588 | 84314591  | 115998527 | 125849772  | 33528887    | 0.0780  | 0.74    |
| 0          | 1408951   | 3562000    | 185195     | 2036802    | 5469550    | 6315062   | 3655868   | 4125875   | 14784895  | 4154420    | 4282278     | 0.0687  | 0.11    |
| 53389195   | 101255122 | 144208074  | 90695241   | 81003055   | 152306054  | 120710869 | 140557193 | 122680989 | 168388958 | 117519475  | 35758239    | 0.0712  | 0.51    |
| 151234483  | 142259223 | 73852508   | 189577779  | 140997317  | 244880594  | 215632406 | 173096142 | 201327019 | 278185783 | 181104325  | 58444629    | 0.0752  | 0.63    |
| 208022212  | 90036852  | 135296405  | 102293270  | 95165151   | 356073964  | 295571705 | 185199063 | 165573869 | 268862625 | 190209512  | 91627591    | 0.0755  | 0.52    |
| 2237349209 | 955882883 | 2206464713 | 1852921174 | 1636717927 | 787871375  | 826289892 | 650845164 | 494873319 | 728934953 | 1237815061 | 673430091   | 0.0864  | 1.74    |
| 17544132   | 24992782  | 34913867   | 28923892   | 22138780   | 27610986   | 13345339  | 19437759  | 16446680  | 31347946  | 23670216   | 7046020     | 0.0758  | 0.57    |
| 2463876    | 3260572   | 5803932    | 5007030    | 1594809    | 5422939    | 2637828   | 2308101   | 4323605   | 1811630   | 3463432    | 1553386     | 0.0795  | 0.56    |
| 9148268    | 13197487  | 11189226   | 8984712    | 10266150   | 9004576    | 1908083   | 3829759   | 5842810   | 8826295   | 8219737    | 3415220     | 0.0862  | 0.69    |
| 11988368   | 6955800   | 8433128    | 8419529    | 15821190   | 18203004   | 3864366   | 2213120   | 5309149   | 3909793   | 8511745    | 5318484     | 0.0741  | 0.09    |
| 2745311    | 4353326   | 12074085   | 6554149    | 3584123    | 19950952   | 7214443   | 7899240   | 9610163   | 21593365  | 9557916    | 6546011     | 0.0755  | 0.21    |
| 66028409   | 158291404 | 359573739  | 190865819  | 372290129  | 124044818  | 35296808  | 274220078 | 135276258 | 34690218  | 175057768  | 124105413   | 0.0851  | 0.52    |
| 1928019451 | 678738572 | 2089966791 | 1170398548 | 1612132678 | 1301134994 | 819533697 | 319210619 | 348409113 | 661381857 | 1092892632 | 632092272   | 0.0926  | 1.66    |
| 41056507   | 49470622  | 62910551   | 62141214   | 38789830   | 21217612   | 17507965  | 18663035  | 19522674  | 20920016  | 35220002   | 18184911    | 0.0965  | 1.64    |
| 246435866  | 26598439  | 53853386   | 61048680   | 107843116  | 73177143   | 93419212  | 51994638  | 14053925  | 35543834  | 76396824   | 66313225    | 0.0896  | 2.19    |
| 129776391  | 103447508 | 165613277  | 209283998  | 95746018   | 313637274  | 90288710  | 259794158 | 92660592  | 225825163 | 168607309  | 79756774    | 0.0940  | 0.62    |
| 63780826   | 36688824  | 105876148  | 32868733   | 36113417   | 49766423   | 21411207  | 34917503  | 33529118  | 19260477  | 43421268   | 25394283    | 0.1057  | 1.88    |
| 99753073   | 123264420 | 153921398  | 157842694  | 99932090   | 145850914  | 130218963 | 123004088 | 122561480 | 133189696 | 128953881  | 19906942    | 0.0976  | 1.50    |
| 107153834  | 146730859 | 277606187  | 218446626  | 125704962  | 342144996  | 357588284 | 391183286 | 225768691 | 501689950 | 269401767  | 128428915   | 0.0975  | 0.48    |
| 11692815   | 275968    | 5446692    | 0          | 261248     | 0          | 0         | 846525    | 259919    | 964819    | 1974799    | 3789599     | 0.1009  | 0.25    |
| 6335177    | 1284790   | 2587063    | 2671506    | 1021709    | 1809089    | 2160766   | 1699101   | 722015    | 4552052   | 2484327    | 1732411     | 0.0978  | 0.25    |
| 109045746  | 155056786 | 193675943  | 213450853  | 127512882  | 166657792  | 116131083 | 98058543  | 96006687  | 128717086 | 140431340  | 40438210    | 0.1091  | 1.46    |
| 182627077  | 103127511 | 327459550  | 171225603  | 100796319  | 70485645   | 43470591  | 43107479  | 11367627  | 32368446  | 108603585  | 95824794    | 0.1055  | 2.05    |
| 8852850    | 668479    | 669251     | 0          | 3218806    | 3006225    | 2107624   | 2454765   | 1623328   | 0         | 2260133    | 2596728     | 0.1055  | 0.32    |
| 445243571  | 210164426 | 258346843  | 334792981  | 298469700  | 463926905  | 239152000 | 238558308 | 158509252 | 87769097  | 273493308  | 117614784   | 0.1171  | 1.54    |
| 1479926    | 2503373   | 1190910    | 7220145    | 666411     | 2663124    | 256203    | 549582    | 304982    | 903592    | 1773825    | 2091113     | 0.1031  | 0.13    |
| 21335709   | 18968331  | 31025185   | 46099831   | 25464029   | 30376104   | 23168934  | 16048810  | 10842588  | 10894338  | 23422386   | 10637573    | 0.1200  | 1.59    |
| 344208867  | 344927619 | 297353477  | 203536249  | 339094665  | 160170832  | 343221994 | 181166231 | 241129302 | 182849992 | 263765923  | 77757578    | 0.1048  | 0.40    |
| 338444     | 1066719   | 1421608    | 174731     | 0          | 3792288    | 924864    | 0         | 1592024   | 257761    | 956844     | 1154038     | 0.1136  | 0.38    |
| 78767175   | 31077695  | 52660389   | 43604353   | 43191767   | 51302410   | 35919106  | 29920334  | 25744106  | 43557097  | 43574443   | 15275545    | 0.1071  | 0.49    |
| 1491294867 | 396855942 | 1315164114 | 1345448097 | 1822271709 | 952226098  | 583180518 | 325945672 | 130552884 | 50375657  | 841331556  | 626833751   | 0.1193  | 1.85    |
| 637332     | 0         | 817899     | 334667     | 6969291    | 11120787   | 16115145  | 4599281   | 10912389  | 13006155  | 6451295    | 6021532     | 0.1075  | 0.12    |
| 17142351   | 490568    | 9771825    | 5443747    | 0          | 0          | 707841    | 6437457   | 6677885   | 4436479   | 5110815    | 5418465     | 0.1135  | 0.27    |
| 13004457   | 685735    | 39540557   | 758855     | 6331848    | 35501569   | 27484975  | 9348378   | 550471    | 30282703  | 16348955   | 15352702    | 0.1233  | 0.46    |
| 625961944  | 555756369 | 707337968  | 793114148  | 570389242  | 279509238  | 245574239 | 266385425 | 214181947 | 230992999 | 448920352  | 223289697   | 0.1335  | 1.49    |
| 3869503    | 328273    | 418700     | 929890     | 682352     | 7888714    | 4111942   | 2388792   | 1829472   | 9430766   | 3187840    | 3198883     | 0.1169  | 0.06    |
| 1252037392 | 208258473 | 328827450  | 408682184  | 922319464  | 584242596  | 779129181 | 226708247 | 64787172  | 101644364 | 487663653  | 390575065   | 0.1317  | 1.86    |
| 269867600  | 46843200  | 111903673  | 67575181   | 61079869   | 136281916  | 151100817 | 159861092 | 206878488 | 167104928 | 137849676  | 69521870    | 0.1357  | 1.45    |
| 8268808    | 0         | 2774638    | 1082132    | 231160     | 3684898    | 1675011   | 2082651   | 1299648   | 7326590   | 2842554    | 2839889     | 0.1223  | 0.19    |
| 54625705   | 33953522  | 52784309   | 11762322   | 27648810   | 14258515   | 28597564  | 3725971   | 19701882  | 47894479  | 29495308   | 17773650    | 0.1275  | 0.50    |
| 359467681  | 217108959 | 285523241  | 319999124  | 184381206  | 125835699  | 76700969  | 106881817 | 111844650 | 121006443 | 190874979  | 100129526   | 0.1398  | 1.54    |
| 1448875    | 5489131   | 6250130    | 36479761   | 16618223   | 16940138   | 0         | 0         | 4419026   | 0         | 8764528    | 11626401    | 0.1302  | 0.33    |
| 50078452   | 44337080  | 45576883   | 55800436   | 43097719   | 42157084   | 45574077  | 43925911  | 39554949  | 20759236  | 43086183   | 9049448     | 0.1348  | 1.43    |
| 6665447    | 11521376  | 12434508   | 26736307   | 245399776  | 15271992   | 40030430  | 16089017  | 6406273   | 111565656 | 49212078   | 75742138    | 0.1424  | 0.40    |

| Accession # | Protein                                              | PEPTIDE                                | Xcorr | MZ     | % Coverage | MW [kDa] |
|-------------|------------------------------------------------------|----------------------------------------|-------|--------|------------|----------|
| 226531069   | inter alpha-trypsin inhibitor, heavy chain 4         | KAFITNFSMIIDGVTPGVVK                   | 5.0   | 1159.1 | 33.3%      | 104.5    |
| 225735645   | sulfated glycoprotein 1                              | TNSSFIQGFVDHVK                         | 3.0   | 527.3  | 31.2%      | 61.4     |
| 124430576   | thyroglobulin                                        | FVNTTDMMFIDLIHNYNR                     | 3.1   | 760.0  | 6.5%       | 304.3    |
| 161086891   | complement component 6                               | VLNFTMK                                | 1.7   | 435.2  | 10.1%      | 86.6     |
| 160333372   | lumican                                              | LGSFDGLVNLTFFIYLQHNQLK                 | 4.3   | 807.8  | 48.5%      | 38.2     |
| 422010931   | complement component C8 gamma chain 2                | SLPVNDSVLDVFER                         | 3.4   | 795.9  | 35.1%      | 18.9     |
| 12963497    | kininogen-1 2                                        | IANFSQSCTLYSGDDLVEALPKPCPGCPR          | 6.0   | 1085.2 | 45.1%      | 47.9     |
| 31560464    | C-type lectin domain family 4 member F               | SSTENTSaelHVLGR                        | 4.2   | 534.6  | 8.8%       | 61.2     |
| 109627652   | complement factor H                                  | DNSCVDPHPVNATIVTR                      | 4.5   | 646.0  | 27.2%      | 141.2    |
| 262331536   | fibrinogen-like protein 1                            | IDLTDFEKNSSFAQYQSFK                    | 4.1   | 757.0  | 15.3%      | 36.4     |
| 109627652   | complement factor H                                  | WDPEPNTSK                              | 2.5   | 617.8  | 27.2%      | 141.2    |
| 226531069   | inter alpha-trypsin inhibitor, heavy chain 4         | GLMLLLNDTQHFSNNVK                      | 4.4   | 649.0  | 33.3%      | 104.5    |
| 8850219     | haptoglobin                                          | NLFLNHSETASAKDITPTLTLYVGK              | 6.5   | 912.5  | 59.9%      | 38.7     |
| 449083339   | fibronectin                                          | LDAPTNLQFVNETDR                        | 4.5   | 867.9  | 22.5%      | 260.0    |
| 31981720    | protein Z-dependent protease inhibitor               | YFDIEYVSINFQNSSQAR                     | 4.8   | 1091.5 | 43.1%      | 51.8     |
| 147904569   | carboxypeptidase N                                   | AFSGSPNLTK                             | 2.3   | 511.8  | 28.3%      | 60.4     |
| 449083339   | fibronectin                                          | DQCIVDDITYNVNDFHK                      | 5.1   | 733.3  | 22.5%      | 260.0    |
| 214010170   | clusterin                                            | QELNDSLQVAER                           | 4.2   | 701.8  | 36.6%      | 51.6     |
| 111378397   | phosphatidylinositol-glycan-specific phospholipase D | LSSSPNVTISCK                           | 3.5   | 647.3  | 27.3%      | 93.6     |
| 8850219     | haptoglobin                                          | VVLHPNHSHVVDIGLIKLLK                   | 3.3   | 496.6  | 59.9%      | 38.7     |
| 244791354   | phosphatidylcholine-sterol acyltransferase           | IVYNHSSGR                              | 1.9   | 517.3  | 21.5%      | 49.7     |
| 31982171    | murinoglobulin-1                                     | NYEQLFHVNAVTEEGTGLEFSR                 | 5.9   | 1372.2 | 43.6%      | 165.2    |
| 153791843   | receptor-type tyrosine-protein phosphatase $\gamma$  | SDFSQTMLFQANTTR                        | 2.9   | 882.4  | 11.2%      | 161.2    |
| 19527214    | apolipoprotein N                                     | ASVVNVTQHCTMESWESMNEVAR                | 4.2   | 900.4  | 23.5%      | 27.9     |
| 125347464   | afamin                                               | NNSESLHLYMYEVAR                        | 2.6   | 664.3  | 30.6%      | 69.3     |
| 112421031   | vitamin K-dependent protein C 2                      | IVNGTLTK                               | 2.0   | 423.7  | 21.7%      | 51.8     |
| 226531069   | inter alpha-trypsin inhibitor, heavy chain 4         | HLQMDIYIFEPQGISILETESTFMTPELANALTTSONK | 4.6   | 1086.8 | 33.3%      | 104.5    |
| 15375312    | complement component C9                              | GAGEVSPAEHSSKPTNISAK                   | 5.1   | 492.7  | 26.9%      | 63.4     |
| 147904569   | carboxypeptidase N                                   | DGSDSAAMVYNSSQEWGLR                    | 4.5   | 1045.4 | 28.3%      | 60.4     |
| 148277039   | alpha-2-macroglobulin-P                              | VSMESVRGNQSLFTDLVVDK                   | 2.1   | 1121.1 | 18.3%      | 164.2    |
| 33563297    | complement component C8 beta chain                   | KTHMFNFTSGFK                           | 3.2   | 487.9  | 34.5%      | 66.2     |
| 144226209   | fetuin-B                                             | VLYLPAYNCTLRPVSK                       | 3.3   | 613.3  | 9.7%       | 33.9     |
| 110347406   | complement factor I                                  | WGEVDLIGNCSQFYPDR                      | 4.9   | 1029.0 | 32.0%      | 67.2     |
| 345110552   | complement component C7                              | RNYTLVGK                               | 2.5   | 476.3  | 17.4%      | 93.3     |
| 244791354   | phosphatidylcholine-sterol acyltransferase           | AELSNHTRPVILVPGCLGNR                   | 6.2   | 735.4  | 21.5%      | 49.7     |
| 291290989   | voltage-dependent calcium channel                    | LDFIEDPNFKNK                           | 2.1   | 494.9  | 3.1%       | 129.6    |
| 6754950     | alpha-1-acid glycoprotein 2                          | EYHTIDDHCYVNSTHLGIQR                   | 6.1   | 820.4  | 35.8%      | 23.8     |
| 31982171    | murinoglobulin-1                                     | NASFVYTK                               | 2.1   | 465.7  | 43.6%      | 165.2    |
| 226531069   | inter alpha-trypsin inhibitor, heavy chain 4         | AFITNFSMIIDGVTPGVVK                    | 3.8   | 730.4  | 33.3%      | 104.5    |
| 8850219     | haptoglobin                                          | NLTSPVGVQPILNEHTFCAGLTK                | 3.9   | 814.1  | 59.9%      | 38.7     |
| 148747546   | serine protease inhibitor A3K                        | YTGNASALLLPDQGR                        | 5.0   | 564.0  | 82.3%      | 46.6     |
| 294997253   | histocompatibility 2, blastocyst                     | EQNYTCHVYHEGLPEPLTLR                   | 4.5   | 819.7  | 19.6%      | 40.2     |
| 31981720    | protein Z-dependent protease inhibitor               | DFDIKETYFNLSKK                         | 4.2   | 583.6  | 43.1%      | 51.8     |
| 283483997   | maltase-glucoamylase                                 | VILILDPAISGNETEPYPAFTR                 | 4.6   | 807.1  | 22.4%      | 208.4    |
| 160333710   | serine protease inhibitor A3M                        | LINDYVSNQQTGMKIK                       | 3.1   | 623.7  | 77.3%      | 47.0     |
| 13385294    | prenylcysteine oxidase                               | LLNQTLR                                | 2.3   | 429.8  | 25.2%      | 56.5     |
| 31982712    | carboxypeptidase B2                                  | KEVHFFVNASDVDSVK                       | 4.9   | 608.3  | 25.1%      | 48.8     |
| 31982171    | murinoglobulin-1                                     | RNYEQLFHVNAVTEEGTGLEFSR                | 5.7   | 725.6  | 43.6%      | 165.2    |
| 112363082   | neogenin 1                                           | LPSGTLVISNATEGDGGLYR                   | 2.5   | 1011.0 | 3.4%       | 162.8    |

| WT 1       | WT 2       | WT 3       | WT 4      | WT 5       | WT 6       | WT 7       | WT 8       | WT 9       | WT 10      | AVG_WT     | StdDev_WT  |
|------------|------------|------------|-----------|------------|------------|------------|------------|------------|------------|------------|------------|
| 1923415    | 2924898    | 115426     | 0         | 0          | 66900      | 427347     | 858206     | 0          | 0          | 631619     | 1011164    |
| 34914756   | 11162164   | 37364346   | 2960282   | 21887609   | 32089354   | 19289038   | 43190325   | 35443820   | 29089271   | 26739096   | 12681632   |
| 0          | 8913294    | 377138     | 1135256   | 1266749    | 98324575   | 8188428    | 35180127   | 0          | 1095115    | 15448068   | 31037016   |
| 180876264  | 49510409   | 94163142   | 38323219  | 103641611  | 2180173    | 20242782   | 74326967   | 31053820   | 14518113   | 60883650   | 54047717   |
| 30880511   | 12403019   | 3399433    | 0         | 609486     | 6673133    | 11527352   | 48434422   | 39759588   | 19499303   | 17318625   | 17011017   |
| 101342395  | 31646036   | 72642414   | 0         | 4515496    | 60040333   | 44342938   | 117666980  | 33614458   | 28749163   | 49456021   | 38705705   |
| 398178703  | 25749794   | 196865446  | 0         | 296019842  | 299500086  | 186879495  | 779491096  | 522044527  | 324999814  | 302972880  | 230471353  |
| 3120054    | 3208901    | 5494860    | 8646035   | 83693      | 12181317   | 4062940    | 10348609   | 7908424    | 4006384    | 5906122    | 3752679    |
| 0          | 544722076  | 115751200  | 31425254  | 12093174   | 222266131  | 8282548    | 1088152    | 155413     | 37513111   | 97329706   | 172370025  |
| 40369761   | 79909409   | 18112638   | 1941681   | 1548957    | 17362796   | 11204374   | 38006333   | 12106295   | 6453795    | 22701604   | 24165034   |
| 0          | 0          | 432790     | 3775469   | 9269650    | 6597036    | 5877436    | 73993084   | 57045139   | 23337367   | 18032797   | 26247481   |
| 314066     | 33576004   | 3265365    | 2701269   | 5397656    | 0          | 510800     | 1033392    | 253567     | 0          | 4705212    | 10298564   |
| 37385013   | 202026719  | 77222031   | 0         | 0          | 0          | 1616794    | 90586946   | 620469     | 0          | 40945797   | 66348480   |
| 105147901  | 506064997  | 172342308  | 97844874  | 41577068   | 101070714  | 434930900  | 452665459  | 258082168  | 94421488   | 226414788  | 174907424  |
| 21209837   | 38091592   | 7032309    | 133346331 | 30608072   | 1348228    | 1151383    | 31742080   | 5280810    | 2868347    | 27267899   | 39832723   |
| 221634628  | 101714593  | 98439854   | 51879774  | 192011839  | 235111363  | 165564695  | 248216469  | 243355566  | 172749050  | 173067783  | 68765508   |
| 353499825  | 609794314  | 346216701  | 4693935   | 54998493   | 287011914  | 521058188  | 157915125  | 680797661  | 278805051  | 329479121  | 224645787  |
| 914363900  | 869144139  | 2947798790 | 670818262 | 1575930585 | 792964367  | 529800328  | 1506952627 | 661080371  | 952994557  | 1142184792 | 722210873  |
| 153424388  | 31359716   | 45328763   | 26652490  | 105009486  | 163691457  | 157819319  | 170381550  | 322226314  | 213768333  | 138966182  | 91564745   |
| 17697055   | 534213     | 539755     | 1353968   | 0          | 0          | 104453     | 13302664   | 638746     | 0          | 3417085    | 6465385    |
| 9942206    | 21978780   | 17641350   | 6100882   | 12509361   | 20420693   | 22346055   | 26343051   | 12991317   | 21827925   | 17210162   | 6501961    |
| 20121665   | 0          | 67190      | 0         | 9532495    | 1264124    | 2938109    | 66115379   | 33905352   | 13307406   | 14725172   | 21175408   |
| 10970958   | 168637179  | 66919828   | 41743987  | 2384265    | 14276712   | 8509290    | 14139078   | 4115997    | 3789760    | 33548705   | 51680280   |
| 6648108    | 380796     | 8446368    | 2673995   | 7144343    | 62401726   | 30131005   | 138689922  | 115084798  | 44137241   | 41573830   | 49575303   |
| 0          | 0          | 52039      | 204408    | 0          | 33260594   | 3308871    | 699027     | 37682099   | 90423285   | 16563032   | 29759629   |
| 62592585   | 59493930   | 63114502   | 25801706  | 62959391   | 61549425   | 48484509   | 105752038  | 46652941   | 35961964   | 57236299   | 21351050   |
| 7631390    | 26304873   | 4280264    | 0         | 0          | 1084199    | 968672     | 44705870   | 5037380    | 1282885    | 9129553    | 14767710   |
| 157450957  | 175829289  | 133819613  | 58541732  | 57537337   | 65705793   | 62255929   | 99924259   | 47100126   | 34874646   | 89303968   | 49679748   |
| 0          | 8704966    | 10684130   | 3001002   | 26551107   | 25049290   | 11353824   | 93359396   | 59552987   | 24209155   | 26246586   | 29097644   |
| 153566329  | 6568581    | 10127402   | 11964132  | 8599607    | 47222433   | 216667548  | 2548272    | 225962077  | 501317264  | 118454364  | 161654706  |
| 67072639   | 17266890   | 15860873   | 6439820   | 30456327   | 23397100   | 16861171   | 99749226   | 27511447   | 22613762   | 32722926   | 28595854   |
| 308014     | 6547411    | 5590839    | 45274630  | 4954056    | 1032833    | 487871     | 0          | 0          | 78163      | 6427382    | 13891461   |
| 403817     | 0          | 512468     | 1163097   | 63674394   | 20632775   | 5704878    | 101942298  | 71098364   | 18827386   | 28395948   | 36897524   |
| 93532662   | 42578939   | 52013865   | 28132991  | 104989200  | 13691851   | 10481636   | 50982399   | 17138100   | 15794361   | 42933600   | 33479242   |
| 58428832   | 5926257    | 16739295   | 5343412   | 3668243    | 15299353   | 43280686   | 82519027   | 60874065   | 51969671   | 34404884   | 28396942   |
| 138826     | 2572393899 | 1350252399 | 886591789 | 352278040  | 19249889   | 24464067   | 135611914  | 0          | 1682869    | 534266369  | 850848837  |
| 75568952   | 98338304   | 63611421   | 9764025   | 14606316   | 12137346   | 13148890   | 549528902  | 14543487   | 3078729    | 85432637   | 166423837  |
| 32859961   | 15362787   | 9685942    | 9698306   | 63744960   | 26525160   | 23212911   | 85756663   | 93086405   | 86382533   | 44631563   | 33945990   |
| 38638866   | 58771192   | 21349344   | 677337    | 732446849  | 13290520   | 10905285   | 84208983   | 18716094   | 9887741    | 98889221   | 224084718  |
| 234962613  | 129957830  | 10800018   | 2688643   | 71804660   | 272472     | 936813     | 2146152758 | 73509848   | 0          | 267108565  | 664603700  |
| 1710652887 | 846092921  | 671824257  | 415916    | 272817716  | 1762786304 | 3428417662 | 2377413608 | 2930430665 | 2541323054 | 1654217499 | 1172032145 |
| 216916254  | 13141447   | 12106980   | 18921143  | 130927838  | 235352177  | 130841574  | 197562879  | 225768174  | 206863761  | 138840223  | 92742841   |
| 58075578   | 363289     | 21163426   | 2098995   | 0          | 0          | 15436151   | 114422293  | 52500087   | 69500559   | 33356038   | 38896260   |
| 22815319   | 13249823   | 7715150    | 220433    | 344692462  | 28811283   | 23170793   | 44568194   | 72774867   | 44536969   | 60255529   | 102140588  |
| 180338546  | 74781310   | 29212153   | 23653273  | 25092718   | 25013820   | 58657734   | 378242608  | 192286165  | 116198645  | 110347697  | 113529512  |
| 22026773   | 32745061   | 96590461   | 74292883  | 580848319  | 207377045  | 227876318  | 70115765   | 57428133   | 387797707  | 175709847  | 182143400  |
| 13176314   | 16583128   | 3154767    | 3017298   | 5966527    | 74494376   | 11158325   | 16106266   | 8589817    | 21032986   | 17327981   | 20950168   |
| 14621123   | 1293601    | 67625      | 735293    | 23428386   | 4235690    | 4779036    | 20404885   | 16062975   | 5055130    | 9068374    | 8712979    |
| 1201567    | 1103059    | 1712021    | 90529627  | 3965269    | 4497924    | 1582610    | 4620011    | 5162979    | 3363189    | 11773826   | 27714309   |

| Null 1     | Null 2     | Null 3    | Null 4     | Null 5     | Null 6     | Null 7    | Null 8     | Null 9     | Null 10    | AVG_Null   | StdDev_Null | p value | Null/WT |
|------------|------------|-----------|------------|------------|------------|-----------|------------|------------|------------|------------|-------------|---------|---------|
| 0          | 0          | 506974    | 0          | 0          | 202610     | 0         | 461555     | 0          | 0          | 117114     | 203838      | 0.1321  | 0.19    |
| 37583605   | 30631558   | 40249293  | 31655350   | 29432455   | 39168585   | 28248441  | 29822490   | 32820640   | 33161881   | 33277430   | 4265113     | 0.1397  | 1.24    |
| 0          | 0          | 465209    | 0          | 0          | 0          | 0         | 0          | 0          | 0          | 46521      | 147112      | 0.1340  | 0.00    |
| 161450539  | 168059758  | 291487812 | 293765434  | 160733872  | 27510320   | 14078598  | 25100411   | 20134483   | 32880953   | 119520218  | 111370151   | 0.1515  | 1.96    |
| 76625853   | 12414452   | 20408435  | 26930807   | 48042488   | 37879198   | 41688110  | 20745793   | 5702404    | 10018642   | 30045618   | 21561571    | 0.1601  | 1.73    |
| 64107915   | 111951689  | 133917033 | 148700638  | 68105527   | 54471726   | 38668280  | 48343097   | 39808615   | 44846489   | 75292101   | 40870267    | 0.1639  | 1.52    |
| 343815508  | 194257265  | 257558498 | 223104829  | 192077941  | 132400763  | 149935822 | 120531477  | 113101669  | 177110567  | 190389434  | 70842857    | 0.1571  | 0.63    |
| 10741661   | 4888445    | 4273105   | 13072051   | 4188348    | 11536939   | 3065005   | 20927579   | 6701470    | 9950363    | 8934497    | 5498346     | 0.1674  | 1.51    |
| 8760889    | 9291866    | 4595838   | 731129     | 4696399    | 21304984   | 26881571  | 29840208   | 19567955   | 33836638   | 15950748   | 11819584    | 0.1537  | 0.16    |
| 2202957    | 1068580    | 4821656   | 970841     | 2515663    | 28694474   | 18096188  | 19087904   | 10818634   | 18918845   | 10719574   | 9874659     | 0.1639  | 0.47    |
| 7081389    | 1592023    | 23937416  | 2061866    | 289846     | 0          | 363011    | 9507331    | 6162472    | 3764726    | 5476008    | 7248138     | 0.1620  | 0.30    |
| 0          | 0          | 0         | 0          | 0          | 0          | 0         | 261655     | 0          | 61262      | 32292      | 82858       | 0.1685  | 0.01    |
| 0          | 0          | 0         | 0          | 0          | 0          | 13520624  | 27245965   | 36171367   | 28805881   | 10574384   | 14701174    | 0.1746  | 0.26    |
| 64880770   | 76449838   | 73981216  | 286626142  | 160730353  | 281629235  | 118759798 | 132361832  | 116112791  | 109486908  | 142101888  | 80273678    | 0.1829  | 0.63    |
| 24888407   | 4352174    | 9950287   | 8694823    | 19050249   | 11015169   | 6733911   | 5137380    | 1563843    | 3441876    | 9482812    | 7333496     | 0.1819  | 0.35    |
| 106260439  | 111106693  | 198478081 | 130972283  | 112144218  | 206873363  | 142837437 | 133606138  | 146829234  | 107659678  | 139676756  | 36305464    | 0.1913  | 0.81    |
| 26428615   | 348019120  | 117438776 | 137548640  | 61480257   | 110669154  | 92990519  | 109419124  | 729780577  | 259822653  | 199359743  | 209183324   | 0.1968  | 0.61    |
| 1121495516 | 1052402946 | 917325793 | 1077568995 | 779538362  | 858634324  | 520185358 | 582807703  | 499381080  | 730788685  | 814012876  | 231036367   | 0.1880  | 0.71    |
| 109222768  | 89436904   | 106708732 | 77912323   | 95445751   | 127059675  | 121904126 | 51746382   | 123281783  | 75398715   | 97811716   | 24472341    | 0.1866  | 0.70    |
| 0          | 0          | 0         | 0          | 0          | 0          | 30161820  | 21366479   | 16352866   | 27715432   | 9559660    | 12857995    | 0.1939  | 2.80    |
| 8102716    | 11223279   | 19336175  | 14320947   | 9854608    | 19821248   | 14137490  | 13492258   | 11413860   | 18031783   | 13973436   | 4018708     | 0.1972  | 0.81    |
| 86800132   | 12230447   | 35314220  | 30715958   | 88511058   | 29863539   | 18586998  | 6305448    | 514818     | 1173668    | 31001629   | 32277129    | 0.1991  | 2.11    |
| 5740816    | 6131801    | 13208732  | 19354313   | 5824674    | 21037940   | 5099016   | 7783205    | 15559687   | 9771048    | 10951123   | 5972364     | 0.1864  | 0.33    |
| 29609328   | 10973365   | 41950546  | 18492738   | 13728358   | 18323788   | 9777704   | 28867353   | 23861280   | 1634003    | 19721846   | 11712442    | 0.1917  | 0.47    |
| 507232     | 437204     | 0         | 0          | 0          | 30402663   | 0         | 349979     | 2471415    | 0          | 3416849    | 9511701     | 0.1999  | 0.21    |
| 47853689   | 56067514   | 73641853  | 77075783   | 46081606   | 34464524   | 26919113  | 27237641   | 29238510   | 38884851   | 45746508   | 18302027    | 0.2127  | 0.80    |
| 840801     | 317275     | 521506    | 262380     | 6150129    | 4863100    | 12048854  | 1672976    | 0          | 539998     | 2721702    | 3898874     | 0.2012  | 0.30    |
| 106787233  | 54663279   | 126893579 | 116169567  | 73237433   | 37262818   | 43298099  | 20389575   | 9191317    | 43047573   | 63094047   | 41042825    | 0.2147  | 0.71    |
| 20519381   | 4377200    | 32718610  | 15740439   | 1267425    | 7849777    | 11390814  | 17090140   | 15301690   | 9669712    | 13592519   | 8966617     | 0.2053  | 0.52    |
| 426048     | 3888354    | 0         | 106833326  | 71697364   | 52905962   | 66833548  | 0          | 2072626    | 170291844  | 47494907   | 58004676    | 0.2078  | 0.40    |
| 100717665  | 47447946   | 133866961 | 39444402   | 75256515   | 42991066   | 22839259  | 18846028   | 14232660   | 27843125   | 52348563   | 39206359    | 0.2172  | 1.60    |
| 0          | 731036     | 772266    | 640057     | 0          | 2578293    | 1024958   | 128089     | 0          | 307432     | 618213     | 783699      | 0.2033  | 0.10    |
| 10471659   | 0          | 70734987  | 1526779    | 0          | 561189     | 459925    | 15799386   | 9723203    | 832668     | 11010980   | 21726557    | 0.2155  | 0.39    |
| 112624779  | 158251828  | 186721293 | 175156467  | 119380004  | 6818130    | 2158683   | 6792546    | 6283164    | 6610436    | 78079733   | 79400679    | 0.2134  | 1.82    |
| 48819782   | 39336030   | 51374483  | 62071909   | 46280255   | 59526311   | 34192732  | 33255311   | 40762549   | 50511910   | 46613127   | 9823205     | 0.2151  | 1.35    |
| 590152     | 736409     | 1173282   | 2812183    | 2082517    | 136936859  | 385039392 | 235612889  | 223067558  | 750876154  | 173892739  | 243520993   | 0.2142  | 0.33    |
| 10888537   | 12412351   | 1060040   | 5266253    | 12320964   | 54462170   | 18485422  | 19779450   | 8929600    | 38295061   | 18189985   | 16295362    | 0.2197  | 0.21    |
| 54333297   | 34065745   | 40100354  | 20986047   | 42814562   | 38901660   | 27071694  | 11481967   | 17544556   | 14795629   | 30209551   | 14034581    | 0.2303  | 0.68    |
| 9059576    | 3310413    | 8983966   | 8435599    | 6444878    | 15427888   | 13173254  | 10301510   | 4881880    | 16859500   | 9687846    | 4392537     | 0.2243  | 0.10    |
| 1153944    | 0          | 0         | 0          | 0          | 17398675   | 12723641  | 4629317    | 2924190    | 3283265    | 4211303    | 6049307     | 0.2270  | 0.02    |
| 459198057  | 3816288537 | 733664020 | 3399368838 | 4761687574 | 2822110620 | 572372339 | 2270113791 | 3884045132 | 1280136207 | 2399898512 | 1567635258  | 0.2439  | 1.45    |
| 258016559  | 222169420  | 183977120 | 242488833  | 194082765  | 210597421  | 124985882 | 113162620  | 109057384  | 140622498  | 179916050  | 54769418    | 0.2434  | 1.30    |
| 37176886   | 11965600   | 7160840   | 7476048    | 17480503   | 45503086   | 13853734  | 12796640   | 8367277    | 13931497   | 17571211   | 13084628    | 0.2396  | 0.53    |
| 31391707   | 17246996   | 32688626  | 27512010   | 23633343   | 21048919   | 18652157  | 14650889   | 9882228    | 19384937   | 21609181   | 7275267     | 0.2482  | 0.36    |
| 62254231   | 37277149   | 20217125  | 110704797  | 54367045   | 132327648  | 53069602  | 40943430   | 87002905   | 62962363   | 66112630   | 34502102    | 0.2538  | 0.60    |
| 71865251   | 159930931  | 74171828  | 161827300  | 120546325  | 124275933  | 103229031 | 91669927   | 84181056   | 78858443   | 107055603  | 33605007    | 0.2564  | 0.61    |
| 62787318   | 15802063   | 101953695 | 72597974   | 14242739   | 5788473    | 14942628  | 15641093   | 8155330    | 5327816    | 31723913   | 34305961    | 0.2723  | 1.83    |
| 40754545   | 6238155    | 14842983  | 13014448   | 24713885   | 14047762   | 10332016  | 6368387    | 3115041    | 7533911    | 14096113   | 11177454    | 0.2767  | 1.55    |
| 1588950    | 2652624    | 563716    | 1981385    | 1466347    | 1163110    | 1606808   | 1838127    | 2021287    | 1552494    | 1643485    | 553152      | 0.2629  | 0.14    |

| Accession # | Protein                                      | PEPTIDE                             | Xcorr | MZ     | % Coverage | MW [kDa] |
|-------------|----------------------------------------------|-------------------------------------|-------|--------|------------|----------|
| 110347469   | alpha-2-macroglobulin                        | LTNQLTGFSAVEQDIPVKNLKPAPIK          | 3.1   | 743.4  | 48.7%      | 165.7    |
| 340745357   | hemolytic complement-like 2                  | VGAPENVTVQAHGHTEAFDITVSVK           | 6.0   | 865.8  | 31.6%      | 38.9     |
| 226958497   | serum amyloid P                              | LIPHLEKPLQNFCLCFR                   | 4.2   | 532.8  | 32.6%      | 26.2     |
| 366039991   | androgen-binding protein                     | LFLNGTSEEYVEYVK                     | 3.6   | 896.4  | 16.1%      | 10.1     |
| 8850219     | haptoglobin                                  | YVMLPVADQDKCVVHYENSTVPEKK           | 3.6   | 728.1  | 59.9%      | 38.7     |
| 148747546   | serine protease inhibitor A3K                | NLINDYVSNQTOGMK                     | 4.6   | 920.0  | 82.3%      | 46.6     |
| 161702988   | apolipoprotein B                             | LPQQIHYYLNASDWER                    | 4.0   | 670.0  | 23.8%      | 509.1    |
| 18252782    | antithrombin-III                             | VTINNWWANK                          | 2.3   | 580.3  | 67.3%      | 52.0     |
| 130503301   | serine protease inhibitor A3N                | YTGNASAMFILPDQ GK                   | 3.5   | 577.3  | 37.1%      | 46.7     |
| 110347469   | alpha-2-macroglobulin                        | INVSYTERPSSNMVVDVK                  | 4.6   | 742.4  | 48.7%      | 165.7    |
| 340745357   | hemolytic complement-like 2                  | LEIVPIIYDNDSLFVQTDK                 | 4.2   | 1112.6 | 31.6%      | 38.9     |
| 226531069   | inter alpha-trypsin inhibitor, heavy chain 4 | GLMLLLNDTQHFSSNVK                   | 4.7   | 981.5  | 33.3%      | 104.5    |
| 274321952   | thyroxine-binding globulin                   | VTTCHLPQQNATLYK                     | 3.3   | 592.3  | 25.1%      | 48.0     |
| 7305235     | leukemia inhibitory factor receptor 1        | IEGLTNETYR                          | 3.1   | 598.8  | 28.2%      | 122.5    |
| 6680684     | protein AMBP                                 | EDSCQLNYSEGPC LGMQER                | 3.6   | 764.0  | 22.6%      | 39.0     |
| 58037159    | complement component C8 gamma chain 1        | KPIGSTSPISITQAOVNFSAQK              | 5.0   | 768.7  | 34.7%      | 22.5     |
| 31981720    | protein Z-dependent protease inhibitor       | LPYQGNATMLV LMEK                    | 4.2   | 920.5  | 43.1%      | 51.8     |
| 8850219     | haptoglobin                                  | NLFLNHSETASAKDITPTLTLYVGKNQLVEIEK   | 5.4   | 738.8  | 59.9%      | 38.7     |
| 8850219     | haptoglobin                                  | NQLVEIEKV LHPNHSVVDIGLIK            | 6.8   | 899.2  | 59.9%      | 38.7     |
| 283483997   | maltase-glucoamylase                         | DQDPASFGNNSLLN SSR                  | 4.9   | 968.9  | 22.4%      | 208.4    |
| 6679731     | coagulation factor V                         | LLNHSLLLHK                          | 3.7   | 396.9  | 21.4%      | 247.1    |
| 115430101   | C4b-binding protein                          | LACLNGTVLR                          | 3.0   | 530.8  | 35.2%      | 51.5     |
| 407228385   | N-acetylmuramoyl-L-alanine amidase a         | APSHNTTEPDPHSLSP ELQALISEVAQHDVQNGR | 7.8   | 736.2  | 18.3%      | 57.7     |
| 274321952   | thyroxine-binding globulin                   | TLYETEVEFSTDFSNV SAAQHK             | 4.8   | 792.7  | 25.1%      | 48.0     |
| 124249351   | inter-alpha-trypsin inhibitor heavy chain H1 | MKTEGEERANLSSQV LK                  | 3.3   | 646.7  | 21.6%      | 101.0    |
| 161702988   | apolipoprotein B                             | LSTSPFALNLTMLPK                     | 3.3   | 825.4  | 23.8%      | 509.1    |
| 160358829   | hemopexin                                    | SWSTVGNCTAALR                       | 3.6   | 712.3  | 54.1%      | 51.3     |
| 109627652   | complement factor H                          | IQCV DGNWTTLPVCIEER                 | 4.7   | 1160.5 | 27.2%      | 141.2    |
| 16418335    | leucine-rich alpha-2-glycoprotein            | SLPPGLFSTSANLSTL VLR                | 4.8   | 987.6  | 18.7%      | 37.4     |
| 161702988   | apolipoprotein B                             | KLSTSPFALNLTMLPK                    | 4.5   | 593.7  | 23.8%      | 509.1    |
| 163914390   | plasma protease C1 inhibitor                 | VGQLQLSHNLSFVIVVPV FPK              | 4.4   | 775.1  | 40.3%      | 55.5     |
| 160333372   | lumican                                      | LSHNELADSGVPGNSFN ISSLLELDLSYK      | 2.9   | 1079.5 | 48.5%      | 38.2     |
| 218156291   | complement factor B                          | KIVLDPSGSMNIYLVLDG SDSIGSSNFTGAK    | 5.1   | 1068.5 | 16.7%      | 79.6     |
| 247269929   | carboxylesterase 1C                          | NIQAVNEIATLSQCNDT S SAAMVQCLR       | 5.3   | 781.9  | 48.2%      | 61.0     |
| 124487350   | cholinesterase                               | DNDSLITR                            | 2.2   | 467.7  | 5.6%       | 68.4     |
| 110347469   | alpha-2-macroglobulin                        | SLGEVNFTATAEALQSP ELCGNK            | 1.8   | 1191.1 | 48.7%      | 165.7    |
| 153945747   | murinoglobulin-2                             | EVNSKLDNNGCSTQEVNIT ELQSK           | 3.4   | 884.4  | 24.6%      | 162.3    |
| 8850219     | haptoglobin                                  | KNLTSPVGVQPI LNEHTFCAGLTK           | 6.7   | 857.1  | 59.9%      | 38.7     |
| 31982171    | murinoglobulin-1                             | YLNETQQLTQK                         | 3.1   | 683.8  | 43.6%      | 165.2    |
| 147904569   | carboxypeptidase N                           | LQDLEITGSPVSNLSAHIFSNL SSLEK        | 5.8   | 967.8  | 28.3%      | 60.4     |
| 33563252    | fibrinogen, alpha polypeptide 2              | GLIDEANQDFTNRINK                    | 2.3   | 617.0  | 50.6%      | 61.3     |
| 6679749     | seprase                                      | VQNVSVLSICDFR                       | 2.1   | 769.4  | 18.3%      | 87.9     |
| 33859809    | fibrinogen beta chain                        | YKGTAGNALMDGASQLV GENR              | 4.4   | 723.7  | 69.9%      | 54.7     |
| 112421031   | vitamin K-dependent protein C 2              | EILVHPNYTR                          | 2.4   | 414.9  | 21.7%      | 51.8     |
| 13384648    | biotinidase                                  | FNDTEVLQR                           | 2.9   | 561.8  | 27.8%      | 59.2     |
| 31981720    | protein Z-dependent protease inhibitor       | KYFDIEYVSINFQNSSQAR                 | 3.9   | 770.7  | 43.1%      | 51.8     |
| 226874935   | inter-alpha-trypsin inhibitor heavy chain H2 | GAFISNFTMTVNGMTFT SSIK              | 3.2   | 763.0  | 27.8%      | 106.3    |
| 21313642    | inhibitor of carbonic anhydrase              | DLLFSDDECLSNLQNK                    | 4.5   | 1007.0 | 28.9%      | 76.7     |
| 226874935   | inter-alpha-trypsin inhibitor heavy chain H2 | KCPNCTETAVNGELVVMYDVNR              | 4.5   | 863.1  | 27.8%      | 106.3    |

| WT 1        | WT 2       | WT 3       | WT 4       | WT 5       | WT 6       | WT 7       | WT 8        | WT 9        | WT 10      | AVG_WT     | StdDev_WT  |
|-------------|------------|------------|------------|------------|------------|------------|-------------|-------------|------------|------------|------------|
| 29472356    | 6027316    | 2240894    | 0          | 149968082  | 10144634   | 14464756   | 82621967    | 51666195    | 16550594   | 36315679   | 47485624   |
| 16220071    | 1312740    | 3077084    | 7765270    | 23123701   | 4219856    | 11074876   | 26539968    | 24725987    | 19962981   | 13802253   | 9539336    |
| 182209      | 1661937    | 407837     | 21494204   | 0          | 0          | 0          | 1441190     | 0           | 0          | 2518738    | 6696591    |
| 4220549     | 32046914   | 26877740   | 5424959    | 90310600   | 464638     | 1032576    | 7606035     | 1768644     | 649629     | 17040228   | 28110211   |
| 42241424    | 9869108    | 0          | 2353775    | 436338     | 0          | 0          | 563173836   | 15432521    | 0          | 63350700   | 176117791  |
| 0           | 142412018  | 160493923  | 111049320  | 88411553   | 59764828   | 4774519    | 1796326     | 0           | 0          | 56870249   | 64501199   |
| 4289830     | 0          | 0          | 714777     | 789212     | 3478352    | 7506634    | 95909676    | 26440411    | 6175378    | 14530427   | 29650835   |
| 175870      | 0          | 2267845    | 1763514    | 16654443   | 12698792   | 2286821    | 25951260    | 23768958    | 16986983   | 10255449   | 10151026   |
| 76807704    | 80566932   | 35886090   | 13484364   | 20315750   | 18030295   | 17197517   | 152119566   | 22459321    | 18312925   | 45518046   | 44913362   |
| 4988507251  | 134891976  | 538691364  | 88170316   | 191686578  | 2639119993 | 7196624903 | 16369079229 | 10049316511 | 8629920352 | 5082600847 | 5467857590 |
| 1314838     | 152424     | 12601038   | 154280     | 186289468  | 794335     | 591202     | 4787477     | 1264755     | 1018113    | 20896793   | 58237164   |
| 0           | 26264528   | 0          | 965777     | 0          | 1132136    | 0          | 0           | 0           | 0          | 2836244    | 8243496    |
| 145587320   | 32194771   | 21450964   | 16911044   | 19144499   | 11149950   | 31975727   | 200162716   | 57885109    | 37411344   | 57387344   | 63573154   |
| 259706820   | 150006392  | 216911094  | 135826719  | 370402696  | 492159713  | 692180378  | 769156760   | 895136319   | 317616826  | 429910372  | 270699548  |
| 107697284   | 61667476   | 38552912   | 15663004   | 29393842   | 42421956   | 75468940   | 281887315   | 95634107    | 24364079   | 77275091   | 78157940   |
| 33080873    | 1395489    | 0          | 2141101    | 33881376   | 8411209    | 11676131   | 59894486    | 18235102    | 11075253   | 17979102   | 19049504   |
| 4558441     | 15592      | 4361028    | 141642426  | 0          | 0          | 1231150    | 2058214     | 0           | 880434     | 15474728   | 44364939   |
| 19391525    | 55287809   | 0          | 0          | 0          | 0          | 190625     | 53817215    | 879875      | 0          | 12956705   | 22733026   |
| 145078278   | 80562596   | 26711456   | 5895621    | 11126267   | 2100894    | 6826183    | 635701030   | 20181609    | 1056593    | 93524053   | 195935883  |
| 39215692    | 10509248   | 4904596    | 7983981    | 31919097   | 72847764   | 39069151   | 68004456    | 61596857    | 57389048   | 39343989   | 25431662   |
| 48622511    | 4279642    | 195752820  | 12624967   | 30864623   | 20257423   | 20129158   | 104216832   | 49549922    | 24697994   | 51099589   | 58160549   |
| 17298903    | 14319762   | 41211241   | 18287123   | 121456393  | 91497070   | 55784555   | 70008962    | 99949016    | 71342411   | 60115544   | 37437938   |
| 51496102    | 4341549    | 3528186    | 0          | 497228382  | 1996850    | 1324944    | 50643229    | 41033725    | 8758404    | 66035137   | 152986481  |
| 358383413   | 34461829   | 85426135   | 350343     | 161801458  | 132252469  | 57911627   | 474544136   | 161841878   | 79993548   | 154696684  | 149970915  |
| 17823294    | 4617921    | 6774373    | 2299204    | 4801084    | 9240780    | 8940353    | 21864188    | 10074009    | 1144430    | 8757964    | 6602732    |
| 210379644   | 209520371  | 1396283558 | 0          | 306581     | 217575126  | 143200354  | 468446339   | 147774476   | 106777143  | 290026359  | 410574024  |
| 77581018    | 119484491  | 167763782  | 91650589   | 423198355  | 315678555  | 343986439  | 3536394622  | 1572605715  | 452982032  | 710132560  | 1085019314 |
| 1342313     | 0          | 449015     | 0          | 0          | 1456836    | 3022949    | 109966798   | 45425950    | 9106701    | 17077056   | 35490454   |
| 327335      | 738195     | 946079     | 359513961  | 59539      | 117859     | 71211      | 3405270     | 14401       | 8235       | 36520209   | 113493122  |
| 22046698    | 1334919    | 5855180    | 1360749    | 6304011    | 27447669   | 16462036   | 43095652    | 17210904    | 11599364   | 15271718   | 13097198   |
| 0           | 290335     | 0          | 0          | 77914915   | 133412     | 0          | 0           | 436005      | 0          | 7877467    | 24609125   |
| 0           | 0          | 72097      | 273955     | 37326322   | 0          | 101246     | 0           | 185482      | 87263      | 3804637    | 11778673   |
| 0           | 2227396    | 0          | 0          | 3609829    | 0          | 0          | 6680798     | 2462942     | 2508573    | 1748954    | 2221007    |
| 0           | 0          | 0          | 0          | 68024325   | 0          | 191877     | 1129631     | 196487      | 56278      | 6959860    | 21458661   |
| 1246370331  | 546190241  | 1020580415 | 587696639  | 2947052989 | 2410364010 | 3743355885 | 3925781934  | 3764570490  | 2552689504 | 2274465244 | 1338094864 |
| 0           | 875125     | 706625     | 0          | 0          | 0          | 0          | 1372274     | 431727      | 0          | 338575     | 493103     |
| 8099019     | 8156020    | 883009     | 5675904    | 114989157  | 27380526   | 4610135    | 0           | 347458      | 4055460    | 17419669   | 35183143   |
| 42105842    | 0          | 3389337    | 14702578   | 0          | 0          | 0          | 206435110   | 6349324     | 0          | 27298219   | 64294804   |
| 10871255356 | 1008991244 | 3170437815 | 2449154491 | 4843683998 | 4717860949 | 8734767127 | 4165797953  | 13677534003 | 9005088006 | 6264457094 | 4087299102 |
| 134645769   | 131488258  | 42613706   | 1204217    | 3863720    | 33661005   | 78502459   | 227219962   | 159804475   | 101141032  | 91414460   | 73315532   |
| 10835213    | 357153     | 10526882   | 6878352    | 3794784    | 26196768   | 18772254   | 99603697    | 11348012    | 1353846    | 18966696   | 29406870   |
| 29543388    | 1104738    | 5879597    | 8429226    | 7752650    | 22790978   | 15554301   | 70991224    | 50820148    | 31594107   | 24446036   | 22225272   |
| 214578486   | 67170928   | 69315827   | 10736422   | 17217785   | 133764333  | 66479102   | 209325313   | 99842970    | 87264236   | 97569540   | 70148442   |
| 43433426    | 20200272   | 24560838   | 8761887    | 27399555   | 19476270   | 21497795   | 57656159    | 28075788    | 17554285   | 26861628   | 14031314   |
| 67265769    | 53310486   | 45149503   | 21842456   | 42432710   | 38488510   | 58977641   | 110285139   | 52594326    | 56843008   | 54718955   | 23240259   |
| 5876535     | 0          | 0          | 5494       | 5513644    | 3023919    | 3558281    | 42657150    | 5039861     | 1530624    | 6720551    | 12834229   |
| 50595316    | 23529807   | 6845583    | 1788662    | 19237359   | 30343522   | 26856280   | 96047981    | 79287780    | 37739697   | 37227199   | 30282141   |
| 346945340   | 26617659   | 224236784  | 0          | 102257284  | 336738449  | 190285691  | 452056124   | 347627936   | 271628511  | 229839378  | 149866702  |
| 25802060    | 0          | 2733944    | 0          | 2548881    | 19740546   | 16410971   | 58590902    | 43470489    | 26998840   | 19629663   | 19824240   |

| Null 1     | Null 2     | Null 3     | Null 4      | Null 5     | Null 6     | Null 7     | Null 8     | Null 9     | Null 10    | AVG_Null   | StdDev_Null | p value | Null/WT |
|------------|------------|------------|-------------|------------|------------|------------|------------|------------|------------|------------|-------------|---------|---------|
| 31549262   | 5973611    | 24484428   | 11946856    | 30412755   | 33423709   | 20204896   | 11224602   | 3864434    | 13641877   | 18672643   | 10872610    | 0.2671  | 0.51    |
| 21076886   | 4946809    | 20179941   | 17204565    | 21501153   | 18575971   | 26139738   | 102444651  | 5230089    | 8076241    | 24537604   | 28341432    | 0.2712  | 1.78    |
| 0          | 0          | 196069     | 0           | 0          | 69836      | 249831     | 177702     | 62157      | 269238     | 102483     | 109868      | 0.2689  | 0.04    |
| 8407609    | 0          | 3221724    | 3262164     | 40227182   | 2544699    | 0          | 1654634    | 2276313    | 617119     | 6221144    | 12191457    | 0.2788  | 0.37    |
| 0          | 0          | 393402     | 0           | 0          | 639513     | 262912     | 1260913    | 0          | 0          | 255674     | 417542      | 0.2721  | 0.00    |
| 8681591    | 0          | 600965     | 13178342    | 143351738  | 38840386   | 42802143   | 0          | 2661799    | 49374084   | 29949105   | 44240650    | 0.2908  | 0.53    |
| 11237228   | 1426574    | 6266269    | 5228042     | 1449337    | 3021687    | 2226333    | 2723865    | 4844158    | 2981214    | 4140471    | 2970871     | 0.2847  | 0.28    |
| 20164034   | 1886291    | 7768718    | 8742354     | 3108247    | 1074126    | 7566033    | 6836662    | 1738635    | 4034435    | 6291953    | 5628702     | 0.2945  | 0.61    |
| 17501063   | 14723596   | 15023964   | 21105959    | 10327555   | 43058144   | 35742086   | 46649030   | 22417488   | 63879791   | 29042868   | 17501851    | 0.2940  | 0.64    |
| 6593657342 | 6565342841 | #####      | 8747713768  | 8099528970 | 5590834335 | 5675420207 | 5399631924 | 5937899219 | 6330264515 | 7063343001 | 1957349689  | 0.2950  | 1.39    |
| 2568844    | 713499     | 605028     | 156273      | 1629029    | 674419     | 432968     | 597002     | 395216     | 594751     | 836703     | 719582      | 0.2904  | 0.04    |
| 0          | 0          | 0          | 0           | 0          | 0          | 0          | 0          | 0          | 0          | 0          | 0           | 0.2909  | 0.00    |
| 34034266   | 19699475   | 82884148   | 48513553    | 31020774   | 28991997   | 12786969   | 32530432   | 18672951   | 38142398   | 34727696   | 19826189    | 0.2961  | 0.61    |
| 304053309  | 731483252  | 310995136  | 1030675256  | 715537240  | 456854891  | 211072821  | 1073016697 | 752537722  | 147163603  | 573338993  | 333990397   | 0.3054  | 1.33    |
| 23428326   | 68302300   | 69705187   | 75063694    | 39176681   | 23561344   | 64328126   | 25176590   | 47860609   | 63943447   | 50054630   | 20800966    | 0.3013  | 0.65    |
| 63478967   | 15444707   | 59745883   | 36066491    | 36248209   | 21853172   | 9405092    | 15507912   | 6253045    | 8629623    | 27263310   | 20922119    | 0.3132  | 1.52    |
| 0          | 0          | 705143     | 65396       | 762765     | 0          | 289689     | 2468042    | 86887      | 525878     | 490380     | 755560      | 0.2997  | 0.03    |
| 0          | 0          | 0          | 208702      | 0          | 1668056    | 16926754   | 10932173   | 7559997    | 13226472   | 5052215    | 6546396     | 0.3047  | 0.39    |
| 876939     | 0          | 8233071    | 894369      | 3707830    | 17160665   | 90313098   | 55181176   | 54510220   | 43198442   | 27407581   | 31454943    | 0.3060  | 0.29    |
| 33086534   | 37765907   | 40939155   | 36951598    | 26056185   | 36317232   | 22759466   | 21657245   | 23172504   | 27362231   | 30606806   | 7189531     | 0.3097  | 0.78    |
| 27534997   | 21325275   | 31785633   | 37291118    | 22988221   | 38715349   | 22435190   | 20834207   | 47144290   | 45018610   | 31507289   | 10004458    | 0.3077  | 0.62    |
| 33864041   | 76190965   | 67827257   | 68392562    | 53640137   | 17535315   | 11269400   | 54602547   | 40095434   | 36442070   | 45985973   | 21887785    | 0.3165  | 0.76    |
| 38166916   | 5967665    | 6998707    | 24298087    | 20051172   | 29769986   | 14548603   | 5913173    | 2280871    | 1906635    | 14990181   | 12598133    | 0.3069  | 0.23    |
| 78591189   | 106491495  | 193469947  | 161998289   | 91639736   | 87782441   | 62662518   | 110678609  | 41280343   | 101836199  | 103643077  | 44878637    | 0.3160  | 0.67    |
| 6853122    | 1288662    | 3753412    | 15368002    | 3692784    | 6419016    | 3655695    | 6687346    | 8463490    | 7089210    | 6327074    | 3849727     | 0.3279  | 0.72    |
| 128567263  | 99503406   | 157175971  | 176226091   | 109906401  | 212067401  | 161871458  | 158766682  | 161650530  | 197057873  | 156279308  | 35562304    | 0.3184  | 0.54    |
| 537272055  | 119766490  | 613204767  | 477521542   | 94183792   | 168779608  | 130473366  | 413134307  | 335911807  | 652178264  | 354242600  | 214840410   | 0.3224  | 0.50    |
| 8986572    | 239941     | 20320630   | 5013672     | 3287403    | 2816758    | 6470278    | 2595013    | 2626259    | 2733752    | 5509028    | 5745505     | 0.3224  | 0.32    |
| 159351     | 28067      | 123719     | 67590       | 130094     | 161305     | 137543     | 125313     | 62568      | 136623     | 113217     | 44746       | 0.3238  | 0.00    |
| 16615921   | 5368595    | 32143810   | 19557933    | 15339323   | 25019471   | 14859150   | 19987080   | 24839433   | 26113980   | 19984470   | 7508081     | 0.3366  | 1.31    |
| 0          | 73873      | 0          | 0           | 0          | 235821     | 180912     | 86080      | 0          | 61320      | 63801      | 84500       | 0.3287  | 0.01    |
| 0          | 0          | 278921     | 0           | 0          | 236518     | 0          | 76166      | 27959      | 60639      | 68020      | 104206      | 0.3291  | 0.02    |
| 4447707    | 372229     | 39282557   | 3943717     | 3101827    | 1960184    | 1481933    | 284950     | 0          | 806756     | 5568186    | 11948676    | 0.3335  | 3.18    |
| 838209     | 172149     | 0          | 173496      | 212758     | 0          | 78561      | 586754     | 0          | 0          | 206193     | 285364      | 0.3328  | 0.03    |
| 1821953379 | 3365315111 | 2205397738 | 4413313978  | 2192690890 | 2804829486 | 1660142861 | 3214700104 | 3433793417 | 2456494830 | 2756863179 | 854639001   | 0.3494  | 1.21    |
| 2101309    | 0          | 17461568   | 337160      | 0          | 0          | 0          | 440623     | 0          | 0          | 2034066    | 5459502     | 0.3410  | 6.01    |
| 988221     | 1244686    | 1148872    | 0           | 22103082   | 1733090    | 3138913    | 262399     | 10182975   | 22061923   | 6286416    | 8822625     | 0.3446  | 0.36    |
| 0          | 0          | 0          | 0           | 0          | 31696012   | 17700666   | 10249451   | 2750502    | 10586893   | 7298352    | 10593447    | 0.3446  | 0.27    |
| #####      | 6357890013 | #####      | 10987499580 | #####      | 6833925725 | 5427015618 | 5185525492 | 3813762109 | 3654820654 | 7945807608 | 3868980055  | 0.3573  | 1.27    |
| 196363786  | 53443399   | 164747519  | 127650548   | 186936720  | 144964323  | 129932664  | 71430073   | 36665169   | 76769815   | 118890402  | 56455242    | 0.3602  | 1.30    |
| 4072758    | 1610757    | 547177     | 6053255     | 38876419   | 22434945   | 5655117    | 5773468    | 5773757    | 3801083    | 9459873    | 11967695    | 0.3562  | 0.50    |
| 15612751   | 17165474   | 34973373   | 16411463    | 14283410   | 17252262   | 13830303   | 14656571   | 15504425   | 16248437   | 17593847   | 6214656     | 0.3602  | 0.72    |
| 87928741   | 37897682   | 102358731  | 39926555    | 64474006   | 154982089  | 55883635   | 67161365   | 66322331   | 71597367   | 74853250   | 34227760    | 0.3696  | 0.77    |
| 30271190   | 37663445   | 34110853   | 20483916    | 26091634   | 15837582   | 16773720   | 14329216   | 17561708   | 7268416    | 22039168   | 9662653     | 0.3825  | 0.82    |
| 64942248   | 58887944   | 54180805   | 52933747    | 36437616   | 42639784   | 31047689   | 50944721   | 41235421   | 41308632   | 47455861   | 10615383    | 0.3806  | 0.87    |
| 2669420    | 656384     | 6688787    | 344215      | 4446099    | 6073679    | 5264513    | 893918     | 1299629    | 1505356    | 2984200    | 2414935     | 0.3776  | 0.44    |
| 41019027   | 20421711   | 11929673   | 33458844    | 27359635   | 47756981   | 39650250   | 19186885   | 13302081   | 25746022   | 27983111   | 12203069    | 0.3824  | 0.75    |
| 363890527  | 312500038  | 451770489  | 370995613   | 302576962  | 251090820  | 184945186  | 197432608  | 161353261  | 194486885  | 279104239  | 96872737    | 0.3942  | 1.21    |
| 30485823   | 10891726   | 18629479   | 20579998    | 12103030   | 7643609    | 8198677    | 9795205    | 8242895    | 11541150   | 13811159   | 7305581     | 0.3953  | 0.70    |

| Accession # | Protein                                                                              | PEPTIDE                           | Xcorr | MZ     | % Coverage | MW [kDa] |
|-------------|--------------------------------------------------------------------------------------|-----------------------------------|-------|--------|------------|----------|
| 100815972   | gamma-glutamyl hydrolase                                                             | SINGVLLPGGGANLTDSGYSR             | 1.7   | 1025.0 | 26.2%      | 35.4     |
| 237757324   | complement factor H-related protein C                                                | EFOHNSTMYK                        | 2.2   | 732.8  | 22.8%      | 92.8     |
| 6755600     | extracellular superoxide dismutase [Cu-Zn]                                           | LEAFSLEGFPAEQNASNR                | 4.0   | 1072.5 | 11.2%      | 27.4     |
| 12963497    | kininogen-1 2                                                                        | HSIEHFNNNDHSHLFTLR                | 7.3   | 464.8  | 45.1%      | 47.9     |
| 144226209   | fetuin-B                                                                             | VLYLPAYNCTLRPVS                   | 4.4   | 632.3  | 9.7%       | 33.9     |
| 13507644    | carboxypeptidase N catalytic chain                                                   | IHLPSMNPDGVEVAAAQGNMMSGYLVGR      | 3.7   | 1031.2 | 30.2%      | 51.8     |
| 188219651   | hepatocyte growth factor activator                                                   | DSITVVLGQHFNR                     | 4.4   | 545.6  | 12.9%      | 70.5     |
| 13507644    | carboxypeptidase N catalytic chain                                                   | IHLPSMNPDGVEVAAAQGNMMSGYLVGR      | 6.1   | 1030.8 | 30.2%      | 51.8     |
| 225735645   | sulfated glycoprotein 1                                                              | TVVTEAGNLLKDNATQEEILHYLEK         | 3.1   | 708.6  | 31.2%      | 61.4     |
| 110347469   | alpha-2-macroglobulin                                                                | SLGEVNFTATAEALQSPCLCGNKLTEVPALVHK | 4.7   | 882.7  | 48.7%      | 165.7    |
| 247269929   | carboxylesterase 1C                                                                  | EGASEEETNSLK                      | 3.3   | 647.8  | 48.2%      | 61.0     |
| 84370359    | noelin d                                                                             | VQNMSQSIEVLD                      | 3.3   | 768.9  | 20.8%      | 14.5     |
| 47059073    | thrombospondin-1                                                                     | VVNSTGPGEHLR                      | 3.5   | 456.6  | 24.0%      | 129.6    |
| 6679731     | coagulation factor V                                                                 | SSSYHENDMENPQSNITMVYLLPLGPK       | 4.1   | 1033.8 | 21.4%      | 247.1    |
| 247269929   | carboxylesterase 1C                                                                  | KNIQAVNEIATLSQCNDTSSAAMVQCLR      | 4.0   | 1084.9 | 48.2%      | 61.0     |
| 87299635    | attractin                                                                            | IDSTGNVTNELR                      | 2.5   | 660.3  | 3.2%       | 158.0    |
| 18252782    | antithrombin-III                                                                     | VTINNWWANKTEGR                    | 4.0   | 534.9  | 67.3%      | 52.0     |
| 147904569   | carboxypeptidase N                                                                   | LQDLEITGSPVSNLSAHIFSNLSSLEK       | 4.7   | 968.2  | 28.3%      | 60.4     |
| 161702988   | apolipoprotein B                                                                     | LTYESGFLNYSKFVEESK                | 4.6   | 714.7  | 23.8%      | 509.1    |
| 110347564   | ceruloplasmin b                                                                      | ELHHLQEQVNSNVFLDKKEFFIGSK         | 9.6   | 996.8  | 29.7%      | 121.1    |
| 13384648    | biotinidase                                                                          | GHLIAQVATNPQGLTGTGNTTSEMDSHR      | 5.9   | 781.1  | 27.8%      | 59.2     |
| 110347406   | complement factor I                                                                  | FNVSLIYGR                         | 2.9   | 535.3  | 32.0%      | 67.2     |
| 159110717   | inter-alpha-trypsin inhibitor heavy chain H3                                         | ENITAEALDLSLK                     | 3.5   | 709.4  | 18.0%      | 99.3     |
| 6755112     | phospholipid transfer protein                                                        | FOIYSNQSALSLALIPLQAPLK            | 4.3   | 849.1  | 23.7%      | 54.4     |
| 31982171    | murinoglobulin-1                                                                     | EVNSQLDNNGCSTQEVNITELQSK          | 5.5   | 1355.1 | 43.6%      | 165.2    |
| 153945747   | murinoglobulin-2                                                                     | EVNSKLDNNGCSTQEVNITELQSK          | 5.0   | 1355.1 | 24.6%      | 162.3    |
| 236465805   | plasma kallikrein                                                                    | GSNFNISK                          | 2.2   | 434.2  | 34.3%      | 71.3     |
| 6754132     | H-2 class I histocompatibility antigen                                               | TLLGYNQSESGSHTIQWMYGCK            | 3.4   | 914.1  | 60.9%      | 37.2     |
| 18252782    | antithrombin-III                                                                     | LGACNDTLK                         | 2.7   | 496.7  | 67.3%      | 52.0     |
| 168229262   | serine (or cysteine) peptidase inhibitor, clade A (alpha-1 antitrypsin, antitrypsin) | LLNDYVSNQTQGMK                    | 3.6   | 870.9  | 30.2%      | 47.3     |
| 160333710   | serine protease inhibitor A3M                                                        | LINDYVSNQTQGMK                    | 3.6   | 870.9  | 77.3%      | 47.0     |
| 85719301    | carcinoembryonic antigen-related cell adhesion molecule 1                            | TLTLLNVTR                         | 2.5   | 516.3  | 26.0%      | 50.0     |
| 84042523    | lysosomal protective protein b                                                       | LDPPCTNTTAPSNLYLNNPYVR            | 2.6   | 803.4  | 15.2%      | 53.8     |
| 226958456   | histidine-rich glycoprotein                                                          | LQEGALPQLPPGYPPHSGANR             | 3.2   | 734.0  | 31.9%      | 60.4     |
| 113461998   | angiotensinogen                                                                      | VYIHPFHLLYHMK                     | 2.8   | 421.5  | 5.0%       | 52.6     |
| 31982171    | murinoglobulin-1                                                                     | ELIFYLVMAQGSIIQTGNHHTQVEPGEAPVK   | 8.0   | 1196.3 | 43.6%      | 165.2    |
| 226531069   | inter alpha-trypsin inhibitor, heavy chain 4                                         | VSGQMHMQNITFQTEASVAQOEK           | 5.2   | 875.7  | 33.3%      | 104.5    |
| 110347469   | alpha-2-macroglobulin                                                                | VVSDISFRPLNETFPVVIETPK            | 5.0   | 1375.7 | 48.7%      | 165.7    |
| 111378397   | phosphatidylinositol-glycan-specific phospholipase D                                 | KNLNYTER                          | 2.7   | 519.8  | 27.3%      | 93.6     |
| 218931167   | procollagen-lysine,2-oxoglutarate 5-dioxygenase 2 1                                  | EAFNITLDHKCK                      | 1.7   | 710.4  | 3.6%       | 86.8     |
| 160415217   | zinc-alpha-2-glycoprotein                                                            | YLNYSR                            | 1.8   | 408.7  | 37.8%      | 35.3     |
| 124249351   | inter-alpha-trypsin inhibitor heavy chain H1                                         | ANLSSQVLK                         | 2.5   | 480.8  | 21.6%      | 101.0    |
| 254553376   | coiled-coil domain-containing protein 105                                            | NEVDIQNQQEISNR                    | 1.8   | 908.9  | 7.8%       | 57.3     |
| 6755112     | phospholipid transfer protein                                                        | GHFYYNISDVR                       | 3.1   | 457.9  | 23.7%      | 54.4     |
| 22122667    | complement component C8 alpha chain                                                  | VQGGSSVWGSVLTHNSSAITYQSWGR        | 3.5   | 922.8  | 6.8%       | 66.0     |
| 226531069   | inter alpha-trypsin inhibitor, heavy chain 4                                         | ISASGALEALEAQLNLNLSLK             | 6.2   | 719.7  | 33.3%      | 104.5    |
| 110347469   | alpha-2-macroglobulin                                                                | LTNQTLLGFSFAVEQDIPVK              | 5.5   | 1054.5 | 48.7%      | 165.7    |



| WT 1       | WT 2       | WT 3      | WT 4      | WT 5       | WT 6       | WT 7       | WT 8       | WT 9       | WT 10      | AVG_WT     | StdDev_WT  |
|------------|------------|-----------|-----------|------------|------------|------------|------------|------------|------------|------------|------------|
| 26740109   | 12867338   | 11867078  | 53117     | 6021678    | 34497300   | 24891126   | 89627082   | 43313544   | 37533746   | 28741212   | 25657165   |
| 32598072   | 62059398   | 63544639  | 21984979  | 54891318   | 43103553   | 26449937   | 52836714   | 22936600   | 25390502   | 40579571   | 16671011   |
| 6423091    | 7233377    | 5159789   | 16550329  | 26783437   | 4957460    | 6934795    | 32412614   | 12399831   | 13347814   | 13220254   | 9538701    |
| 3209166439 | 783956796  | 674051649 | 567750758 | 878939808  | 2018155556 | 1949272147 | 8252718232 | 5329955743 | 1402323235 | 2506629036 | 2494117047 |
| 1242960416 | 56430865   | 73744317  | 115463057 | 326119656  | 2391525284 | 1431243275 | 2623197255 | 3285103461 | 2623488053 | 1416927564 | 1243651900 |
| 81478670   | 559806     | 260320    | 2533102   | 2931180    | 90385672   | 71483509   | 83339196   | 140315144  | 117013503  | 59030010   | 53139361   |
| 14595760   | 0          | 4184091   | 256268    | 2865748    | 13690522   | 19735069   | 41800546   | 41872941   | 39887378   | 17888832   | 17343756   |
| 55314155   | 222418     | 274961    | 1465904   | 945928     | 55070992   | 38623452   | 62552213   | 86714496   | 60992613   | 36217713   | 32698053   |
| 8966800    | 13810216   | 36360995  | 0         | 561296     | 8435296    | 4638132    | 12595505   | 18857497   | 6203675    | 11042941   | 10643209   |
| 6197930    | 0          | 2046229   | 0         | 64320817   | 118786     | 132125     | 673770     | 13056126   | 6936544    | 9348233    | 19790396   |
| 41960889   | 20620775   | 26074747  | 12683525  | 41635625   | 118204748  | 77427032   | 86193096   | 98101029   | 81216519   | 60411798   | 36333120   |
| 7802595    | 3225873    | 11509997  | 711811    | 15061881   | 22654943   | 14782583   | 15441323   | 19648968   | 23065323   | 13390530   | 7647567    |
| 7563523    | 12252572   | 7444005   | 1741574   | 2024203    | 27645353   | 21292345   | 17985799   | 6548911    | 2072990    | 10657128   | 8959392    |
| 88611448   | 4114079    | 45084180  | 0         | 80556731   | 99166367   | 52385698   | 145016343  | 82310412   | 67262784   | 66450804   | 43641273   |
| 437068     | 409860     | 0         | 0         | 8436049    | 2607669    | 867737     | 2727136    | 3249177    | 1597253    | 2033195    | 2544835    |
| 686087     | 4164105    | 2605061   | 3774025   | 32083516   | 16179830   | 4949523    | 1707448    | 655607     | 7540852    | 7434606    | 9786344    |
| 8952433    | 0          | 2929544   | 353136    | 8396581    | 12458389   | 8412376    | 48480707   | 38409895   | 13978010   | 14237107   | 16259926   |
| 197129669  | 116895512  | 33411400  | 56372     | 1985481    | 17400988   | 59906565   | 201548524  | 181845714  | 87959928   | 89814015   | 80482967   |
| 58723066   | 278647     | 0         | 754491    | 39155100   | 87431662   | 46824910   | 516456635  | 100125929  | 55955075   | 90570552   | 153721398  |
| 234806156  | 126281129  | 40992797  | 0         | 57762851   | 113475687  | 69103627   | 416089736  | 226886130  | 102704457  | 138810257  | 123028077  |
| 34331154   | 5779007    | 9099283   | 4922202   | 0          | 17660906   | 80567028   | 165960427  | 56868006   | 69237675   | 44442569   | 51576560   |
| 484716967  | 59962735   | 128836910 | 8227803   | 329291288  | 402798088  | 466435166  | 832405156  | 686143047  | 374576658  | 377339382  | 263228194  |
| 51521877   | 233550     | 23740616  | 448440    | 6815698    | 35415188   | 38403279   | 263490344  | 41502524   | 27190206   | 48876172   | 77455366   |
| 17349802   | 11106000   | 2386985   | 4846      | 44782      | 10938625   | 19883751   | 37738122   | 34666638   | 29760001   | 16387955   | 14027846   |
| 96146885   | 40409970   | 105910055 | 40263466  | 129357531  | 159112804  | 58150966   | 143513597  | 100437842  | 90852110   | 96415523   | 40995331   |
| 96146885   | 40409970   | 105910055 | 40263466  | 129357531  | 159112804  | 58150966   | 143513597  | 100437842  | 90852110   | 96415523   | 40995331   |
| 209553732  | 108427704  | 143598840 | 73966555  | 239081850  | 357092662  | 230955057  | 361326130  | 351687289  | 312023033  | 238771285  | 106070301  |
| 1305210    | 247070     | 0         | 4356430   | 18422341   | 10912264   | 8144123    | 31050371   | 33009540   | 11993679   | 11944103   | 12094616   |
| 1098092016 | 913698343  | 901335945 | 393827943 | 1146144641 | 1675685110 | 1313912601 | 1883441375 | 1481756896 | 1223759822 | 1203165469 | 424337873  |
| 799801445  | 353270798  | 335538712 | 91378964  | 95683894   | 279829257  | 629669333  | 1337467180 | 763399624  | 372998309  | 505903752  | 383072573  |
| 799801445  | 353270798  | 335538712 | 91378964  | 95683894   | 279829257  | 629669333  | 1337467180 | 763399624  | 372998309  | 505903752  | 383072573  |
| 16051024   | 2308441    | 9609909   | 1415615   | 18716702   | 22548891   | 16205240   | 33819088   | 20913717   | 14783927   | 15637255   | 9621371    |
| 497270130  | 114681628  | 437271482 | 148138965 | 29770713   | 229493213  | 296610733  | 1974577257 | 2000282703 | 418062633  | 614615946  | 738801380  |
| 17248574   | 201473     | 0         | 3117907   | 16976051   | 28134740   | 20165991   | 34487305   | 45203883   | 30643405   | 19617933   | 15336387   |
| 15408469   | 0          | 0         | 59977     | 0          | 7253826    | 7164819    | 15340568   | 19629121   | 4551276    | 6940806    | 7460852    |
| 57076026   | 19343463   | 2686222   | 0         | 0          | 11977827   | 10757231   | 120443525  | 81511093   | 26918745   | 33071413   | 40601561   |
| 1623266469 | 988278574  | 535004206 | 306620439 | 483306563  | 291403261  | 1005363125 | 4218159691 | 1193143930 | 579205232  | 1122375149 | 1167898057 |
| 2200420    | 1131287    | 4461945   | 0         | 0          | 3576964    | 0          | 0          | 0          | 162840     | 1153346    | 1684892    |
| 9273446    | 7365831    | 7771916   | 2845722   | 10280017   | 20784543   | 18489808   | 20083141   | 18894557   | 14688516   | 13047750   | 6341693    |
| 294382     | 105838388  | 126095149 | 115801558 | 143888988  | 129086565  | 61676540   | 1243642    | 623634     | 50090888   | 73463973   | 57950836   |
| 213863764  | 132157973  | 195034549 | 82818660  | 226839572  | 260157213  | 194128138  | 386286188  | 318218137  | 203977173  | 221348137  | 86320500   |
| 84863952   | 44841610   | 43099143  | 102985348 | 564462152  | 517350975  | 644080567  | 52890293   | 453025688  | 464030487  | 297163021  | 250129043  |
| 0          | 9725342    | 13590132  | 1761392   | 40586421   | 3702700    | 753219     | 0          | 0          | 7510432    | 7762964    | 12461861   |
| 65736880   | 9085750    | 9698282   | 7519037   | 14817906   | 53853468   | 92708624   | 94470629   | 110440835  | 98512950   | 55684436   | 42279823   |
| 0          | 95580      | 0         | 987600    | 1634167    | 631959     | 185624     | 32939872   | 2505309    | 192146     | 3917226    | 10230623   |
| 353332132  | 2205525952 | 722523740 | 0         | 33505466   | 196709569  | 144397712  | 136918539  | 361244074  | 168840733  | 432299792  | 656659637  |
| 2611285971 | 663961417  | 953447682 | 0         | 722516693  | 1213460828 | 1618137808 | 6072118559 | 4390109330 | 2835315340 | 2108035363 | 1901057457 |

| Null 1     | Null 2     | Null 3     | Null 4     | Null 5     | Null 6     | Null 7     | Null 8     | Null 9     | Null 10    | AVG_Null   | StdDev_Null | p value | Null/WT |
|------------|------------|------------|------------|------------|------------|------------|------------|------------|------------|------------|-------------|---------|---------|
| 22557336   | 22093716   | 33885743   | 22536150   | 23518019   | 19192967   | 18250322   | 18596429   | 18578506   | 15847173   | 21505636   | 4998065     | 0.3929  | 0.75    |
| 41660192   | 44974872   | 50757858   | 64270329   | 36978788   | 28483648   | 18386269   | 18452191   | 16240582   | 22863093   | 34306782   | 16122992    | 0.4036  | 0.85    |
| 7567773    | 13877444   | 20482024   | 4721296    | 6044771    | 18087629   | 9833380    | 9523453    | 3969494    | 8216133    | 10232340   | 5567821     | 0.4035  | 0.77    |
| 1077328603 | 1484891747 | 1703466551 | 4097946093 | 2408499821 | 1846832424 | 1688670371 | 790848368  | 1780233288 | 960691480  | 1783940875 | 943805493   | 0.4027  | 0.71    |
| 1947992932 | 1970120929 | 1633494072 | 2162699201 | 1533241270 | 2220062777 | 1153059505 | 1693884625 | 1528098519 | 1775141907 | 1761779574 | 324459163   | 0.4073  | 1.24    |
| 92327958   | 54753178   | 103373886  | 57218745   | 78468930   | 102411212  | 69160153   | 68483851   | 63051321   | 51912621   | 74116185   | 19262517    | 0.4097  | 1.26    |
| 25319900   | 8286974    | 29431177   | 15748331   | 29672686   | 43500468   | 24786242   | 23140418   | 9051734    | 23242836   | 23218077   | 10424030    | 0.4159  | 1.30    |
| 55852432   | 34675001   | 58016121   | 35816217   | 56134992   | 61839150   | 39698950   | 46476826   | 34691347   | 30460473   | 45366151   | 11701352    | 0.4157  | 1.25    |
| 8844242    | 5845427    | 8716271    | 8094486    | 7441657    | 13006069   | 9028318    | 6441923    | 4808549    | 9442401    | 8166934    | 2278441     | 0.4143  | 0.74    |
| 2764706    | 6720054    | 5257631    | 6661153    | 750871     | 4229624    | 5838381    | 2010299    | 3019572    | 3695085    | 4094738    | 2013858     | 0.4146  | 0.44    |
| 37120394   | 43836157   | 55126285   | 52925885   | 34355692   | 64599179   | 50678273   | 57153463   | 49729383   | 59872659   | 50539737   | 9677343     | 0.4173  | 0.84    |
| 8288274    | 15540186   | 15032215   | 18194646   | 9890839    | 7424552    | 6817737    | 10784710   | 8359391    | 11469364   | 11180191   | 3864491     | 0.4253  | 0.83    |
| 1876606    | 9635880    | 32202548   | 7827964    | 2772177    | 5053093    | 4281217    | 2510427    | 4466568    | 3509259    | 7413574    | 9037927     | 0.4308  | 0.70    |
| 73044070   | 75183710   | 98817421   | 101251159  | 73260352   | 88057146   | 59270333   | 64400439   | 71868872   | 75795547   | 78094905   | 13776765    | 0.4315  | 1.18    |
| 7204511    | 327649     | 17588211   | 2105805    | 2902410    | 2871318    | 143497     | 670881     | 294872     | 1243636    | 3535279    | 5370523     | 0.4346  | 1.74    |
| 2240667    | 8029324    | 4876778    | 7924242    | 8269701    | 4154988    | 4632659    | 4290522    | 1951871    | 2401815    | 4877257    | 2433365     | 0.4330  | 0.66    |
| 37228733   | 810295     | 9934099    | 9833982    | 3483546    | 7518244    | 4975833    | 2388105    | 4082292    | 13856093   | 9411122    | 10562586    | 0.4415  | 0.66    |
| 206646350  | 41426616   | 106491898  | 92636961   | 251047788  | 170521593  | 144475217  | 77932551   | 24576119   | 49225937   | 116498103  | 75055005    | 0.4532  | 1.30    |
| 28899030   | 821778     | 77507489   | 52001926   | 14265679   | 98208025   | 90243973   | 73588747   | 43161387   | 39716278   | 51841431   | 32523483    | 0.4458  | 0.57    |
| 173567588  | 70894943   | 136442365  | 131605434  | 131316733  | 157661544  | 102244665  | 67186454   | 39122410   | 58724971   | 106876711  | 45838388    | 0.4518  | 0.77    |
| 3508224    | 36622205   | 60057669   | 85423866   | 59222537   | 67660009   | 54929317   | 76732633   | 52486634   | 84850282   | 58149338   | 24469775    | 0.4575  | 1.31    |
| 448510237  | 268368707  | 560472615  | 394440497  | 479954937  | 680487416  | 445867688  | 424897912  | 343794340  | 410663608  | 445745796  | 113332428   | 0.4601  | 1.18    |
| 23916098   | 19650670   | 17601815   | 26877181   | 29763359   | 45623438   | 33495603   | 41789571   | 25810649   | 36461596   | 30098998   | 9202387     | 0.4564  | 0.62    |
| 34705280   | 12003699   | 25201485   | 28992666   | 38783206   | 18530896   | 18642235   | 10478640   | 5842738    | 12153968   | 20533481   | 11028845    | 0.4720  | 1.25    |
| 124917218  | 177028706  | 95361641   | 240338758  | 132403646  | 72411449   | 84610178   | 61193037   | 69840420   | 70119612   | 112822466  | 57718670    | 0.4731  | 1.17    |
| 124917218  | 177028706  | 95361641   | 240338758  | 132403646  | 72411449   | 84610178   | 61193037   | 69840420   | 70119612   | 112822466  | 57718670    | 0.4731  | 1.17    |
| 212818070  | 299817102  | 424149974  | 339435270  | 221180740  | 279924275  | 205077272  | 212832437  | 222317971  | 265407347  | 268296046  | 70689336    | 0.4733  | 1.12    |
| 27786023   | 5483268    | 22522256   | 7139627    | 3487552    | 4299328    | 2704752    | 4471067    | 4040138    | 2893283    | 8482729    | 8965587     | 0.4766  | 0.71    |
| 1043615431 | 1381126069 | 1569924599 | 1594769192 | 1058480889 | 785169795  | 872799966  | 810947395  | 831771221  | 866966281  | 1081557084 | 317402637   | 0.4774  | 0.90    |
| 582835836  | 411820497  | 720366371  | 648611093  | 561285989  | 621935788  | 600904651  | 542418764  | 603854865  | 665184871  | 595921873  | 82966675    | 0.4770  | 1.18    |
| 582835836  | 411820497  | 720366371  | 648611093  | 561285989  | 621935788  | 600904651  | 542418764  | 603854865  | 665184871  | 595921873  | 82966675    | 0.4770  | 1.18    |
| 17441420   | 21509664   | 25949535   | 26052509   | 16053112   | 15932029   | 13374387   | 14611491   | 15499571   | 14261754   | 18068547   | 4735124     | 0.4826  | 1.16    |
| 1050735579 | 467410965  | 657287403  | 60913737   | 523102551  | 232927899  | 295335308  | 186484456  | 200556014  | 673050566  | 434780448  | 300189933   | 0.4849  | 0.71    |
| 18104461   | 5703071    | 22642520   | 15586633   | 16808089   | 26763902   | 10521806   | 12993149   | 11811313   | 18895919   | 15983086   | 6112323     | 0.4952  | 0.81    |
| 10376917   | 4280992    | 7645601    | 4036257    | 5837929    | 22981270   | 13911558   | 5984481    | 6502606    | 8356074    | 8991368    | 5734693     | 0.4996  | 1.30    |
| 215232791  | 22723784   | 65782568   | 46562996   | 73882347   | 35996239   | 17634669   | 8039054    | 2597963    | 4984174    | 49343658   | 63377657    | 0.5029  | 1.49    |
| 561250870  | 451729735  | 991510244  | 571341138  | 439584564  | 1696767595 | 787342314  | 1040685319 | 570779870  | 1409793035 | 852078468  | 429043272   | 0.5008  | 0.76    |
| 3787896    | 83262      | 1461250    | 386530     | 7955392    | 1942547    | 1245860    | 950028     | 47551      | 0          | 1786032    | 2455366     | 0.5102  | 1.55    |
| 6667670    | 7906511    | 21946358   | 14821857   | 7839435    | 15437509   | 4607984    | 12661281   | 7286888    | 13751001   | 11292649   | 5339218     | 0.5117  | 0.87    |
| 77702659   | 49240727   | 26097663   | 114538815  | 82342063   | 36498019   | 44127210   | 54705003   | 81221195   | 30891062   | 59736442   | 28247842    | 0.5093  | 0.81    |
| 222707424  | 286743079  | 389985857  | 279043398  | 229525189  | 234625210  | 187075392  | 191092189  | 201119413  | 214228770  | 243614592  | 61355879    | 0.5146  | 1.10    |
| 525394750  | 211110803  | 452105452  | 665362985  | 599239579  | 437413319  | 153598094  | 235489538  | 208425930  | 138948593  | 362708904  | 195604881   | 0.5222  | 1.22    |
| 0          | 0          | 0          | 0          | 18671831   | 2742226    | 1224403    | 2884924    | 3794846    | 18323575   | 4764180    | 7372314     | 0.5208  | 0.61    |
| 63652011   | 63563897   | 103631874  | 62141241   | 76526548   | 81664802   | 40237241   | 44104226   | 45134006   | 71430518   | 65208636   | 19437799    | 0.5257  | 1.17    |
| 2823973    | 4796440    | 8000012    | 0          | 0          | 0          | 0          | 996632     | 175148     | 607992     | 1740020    | 2710018     | 0.5236  | 0.44    |
| 233915796  | 169163215  | 269651646  | 290147592  | 128147824  | 422198878  | 303831588  | 365196049  | 227798225  | 548108843  | 295815965  | 123751747   | 0.5265  | 0.68    |
| 3691726960 | 1571170856 | 3963366586 | 3630627552 | 4045414678 | 2368481477 | 2123736200 | 1586051654 | 750708561  | 1758735460 | 2549001998 | 1186528949  | 0.5416  | 1.21    |

| Accession # | Protein                                                                                 | PEPTIDE                            | Xcorr | MZ     | % Coverage | MW [kDa] |
|-------------|-----------------------------------------------------------------------------------------|------------------------------------|-------|--------|------------|----------|
| 109627652   | complement factor H                                                                     | DNSCVDPPHPVNATIVTR                 | 4.5   | 665.0  | 27.2%      | 141.2    |
| 283483997   | maltase-glucoamylase                                                                    | FSVNQTTLLTHEK                      | 3.4   | 759.9  | 22.4%      | 208.4    |
| 6678085     | alpha-1-antitrypsin 1-4                                                                 | GDTHTQILEGLQFNLTQTSEADIIHK         | 8.5   | 1399.7 | 81.4%      | 46.0     |
| 6679731     | coagulation factor V                                                                    | DIHVVFHFGQTLLDNR                   | 2.1   | 476.2  | 21.4%      | 247.1    |
| 247269929   | carboxylesterase 1C                                                                     | FHSELNISESMPIAVIEQYLR              | 5.9   | 831.8  | 48.2%      | 61.0     |
| 407228385   | N-acetylmuramoyl-L-alanine amidase a                                                    | GFGVAFVGNYSGLPNEAALNTVR            | 5.9   | 1228.1 | 18.3%      | 57.7     |
| 115430101   | C4b-binding protein                                                                     | LACLNGTVLR                         | 3.2   | 559.3  | 35.2%      | 51.5     |
| 110347564   | ceruloplasmin b                                                                         | ELHHLQEQNVSNVFLDK                  | 6.9   | 684.3  | 29.7%      | 121.1    |
| 110347469   | alpha-2-macroglobulin                                                                   | SLGEVNFTATAEALQSPELCGNK            | 4.2   | 1219.6 | 48.7%      | 165.7    |
| 449083339   | fibronectin                                                                             | ESNPLTAQQTTKLDAPTNLQFVNETDR        | 4.9   | 1011.8 | 22.5%      | 260.0    |
| 111378397   | phosphatidylinositol-glycan-specific phospholipase D                                    | THWTPFLNASIHYIR                    | 4.4   | 465.2  | 27.3%      | 93.6     |
| 6754330     | interleukin-1 receptor type 2                                                           | LLISNTSMDDAGYYR                    | 2.0   | 868.4  | 7.8%       | 45.6     |
| 170172530   | immunoglobulin J chain                                                                  | IVVPLNNRENISDPTSPLR                | 3.7   | 712.4  | 49.7%      | 18.0     |
| 161702988   | apolipoprotein B                                                                        | LYESGFLNYSK                        | 3.0   | 712.3  | 23.8%      | 509.1    |
| 6680856     | corticosteroid-binding globulin                                                         | LFPSPENTREEDFYVNETSTVK             | 3.9   | 1302.6 | 42.8%      | 44.7     |
| 163914390   | plasma protease C1 inhibitor                                                            | GVTSVSQIFHSPDLAIRDTYVNASQSLYGSSPR  | 4.9   | 889.4  | 40.3%      | 55.5     |
| 159110717   | inter-alpha-trypsin inhibitor heavy chain H3                                            | GDEKENITAEALDSLK                   | 4.9   | 924.0  | 18.0%      | 99.3     |
| 236465805   | plasma kallikrein                                                                       | LQTPLNYTEFQKPICLPSK                | 5.0   | 760.1  | 34.3%      | 71.3     |
| 167555029   | fibrinogen                                                                              | MDGSLNFNR                          | 3.1   | 535.7  | 42.3%      | 87.4     |
| 6753332     | CD14                                                                                    | NPSPDELPOQVGNLSLK                  | 2.2   | 854.9  | 12.8%      | 39.2     |
| 86262151    | rho GTPase-activating protein 5                                                         | VSGNKTQDQNIQK                      | 2.6   | 483.2  | 9.3%       | 172.4    |
| 115430101   | C4b-binding protein                                                                     | LVGSPFIGCTVVNK                     | 3.8   | 746.4  | 35.2%      | 51.5     |
| 168229262   | serine (or cysteine) peptidase inhibitor, clade A (alpha-1 antiproteinase, antitrypsin) | EARKLLNDYVSNQTOGMIK                | 2.0   | 1113.6 | 30.2%      | 47.3     |
| 345110552   | complement component C7                                                                 | VDNDFNYEFYNSSWSYIK                 | 3.9   | 1147.0 | 17.4%      | 93.3     |
| 126723423   | macrophage colony-stimulating factor 1 receptor                                         | CDEAQAQLQVWVNDTHPEVLSQKPFDK        | 2.3   | 986.1  | 16.5%      | 109.1    |
| 6680856     | corticosteroid-binding globulin                                                         | GSTQYLENLGFNMSK                    | 3.5   | 569.3  | 42.8%      | 44.7     |
| 31982712    | carboxypeptidase B2                                                                     | IPFNVLMNNVEDLIEQQTFNDTVSPR         | 5.6   | 1017.5 | 25.1%      | 48.8     |
| 126722834   | tenascin                                                                                | EPEIGNLVSDVTPK                     | 2.0   | 807.4  | 3.8%       | 221.7    |
| 111378397   | phosphatidylinositol-glycan-specific phospholipase D                                    | NLNYTER                            | 2.1   | 455.7  | 27.3%      | 93.6     |
| 148277039   | alpha-2-macroglobulin-P                                                                 | GNQSLFTDLVVDK                      | 3.3   | 718.9  | 18.3%      | 164.2    |
| 148747546   | serine protease inhibitor A3K                                                           | EMDIVFHEHQDNGTQDDSLTLASVNTDFAFSLYK | 6.8   | 976.9  | 82.3%      | 46.6     |
| 283483997   | maltase-glucoamylase                                                                    | LVIILDPAINNSFSSNPYPGYDR            | 3.4   | 885.4  | 22.4%      | 208.4    |
| 38490561    | cadherin-5                                                                              | NEDSNFTLINNHDTANITVK               | 4.3   | 793.0  | 14.3%      | 87.8     |
| 224967112   | coagulation factor XIII B chain                                                         | KEQETCLAPELEHGNYSSTQR              | 6.3   | 624.0  | 29.2%      | 76.1     |
| 41235784    | kininogen 2 1                                                                           | HAIEYFNNTGHSHLFALR                 | 5.8   | 561.3  | 14.0%      | 71.2     |
| 6679731     | coagulation factor V                                                                    | VSTVTLVSATSTTANMTMSPEGR            | 3.6   | 792.4  | 21.4%      | 247.1    |
| 261823995   | serum paraoxonase/arylesterase 1                                                        | HANWTLPLK                          | 2.9   | 591.3  | 22.3%      | 39.5     |
| 124486702   | alpha-1B-glycoprotein                                                                   | FSLGAITSNNSGIYR                    | 4.0   | 800.9  | 29.7%      | 56.5     |
| 6753798     | prothrombin                                                                             | YPHKPEINSTTHPGADLK                 | 3.7   | 502.3  | 31.7%      | 70.2     |
| 54112422    | mannan-binding lectin serine protease 2 1                                               | VLATLCGQESTDTEQAPGNDTFYSLGPSLK     | 4.7   | 1067.5 | 16.9%      | 75.5     |
| 163914390   | plasma protease C1 inhibitor                                                            | DTYVNASQSLYGSSPR                   | 4.4   | 873.4  | 40.3%      | 55.5     |
| 218156291   | complement factor B                                                                     | SPFYNLSDQISFQCYDGYVLR              | 4.8   | 1287.6 | 16.7%      | 79.6     |
| 160358795   | interferon alpha/beta receptor 2 b                                                      | VNNVTGNFTFVLR                      | 3.4   | 741.9  | 18.6%      | 27.7     |
| 19527078    | fibrinogen gamma chain                                                                  | TLEDILFRAENR                       | 2.9   | 493.3  | 41.7%      | 49.4     |
| 124486702   | alpha-1B-glycoprotein                                                                   | LLFVGPOHAGNYSCR                    | 4.6   | 573.9  | 29.7%      | 56.5     |
| 6679731     | coagulation factor V                                                                    | NLIGLDENFVLNSSTEHR                 | 4.5   | 687.3  | 21.4%      | 247.1    |
| 226958456   | histidine-rich glycoprotein                                                             | LPPLNIGEVLTLPANFSPFSLPNCNR         | 4.3   | 1004.2 | 31.9%      | 60.4     |
| 170295832   | extracellular matrix protein 1                                                          | NVALVAGDTGNATGLGEQGPTR             | 5.1   | 1050.0 | 31.7%      | 62.8     |

| WT 1       | WT 2       | WT 3      | WT 4      | WT 5       | WT 6       | WT 7       | WT 8       | WT 9       | WT 10      | AVG_WT     | StdDev_WT  |
|------------|------------|-----------|-----------|------------|------------|------------|------------|------------|------------|------------|------------|
| 1992863815 | 894692782  | 448832934 | 562679948 | 64602528   | 521973340  | 1376136011 | 4506730233 | 1837829182 | 1395265280 | 1360160605 | 1273448993 |
| 8527528    | 0          | 10761084  | 625111    | 1741548    | 27122239   | 12078713   | 16469269   | 25025289   | 27681150   | 13003193   | 10782559   |
| 165715596  | 232699269  | 100626191 | 0         | 96358535   | 67894299   | 130564578  | 228765785  | 504984761  | 85036967   | 161264598  | 140313112  |
| 15278038   | 2841194    | 1863766   | 899471    | 15108753   | 6360636    | 29971160   | 23002989   | 13970365   | 18565817   | 12786219   | 9700517    |
| 4525271    | 1125054    | 726294    | 40717     | 8907961    | 1000727    | 4865198    | 10510237   | 19284754   | 9788219    | 6077443    | 6102088    |
| 16584732   | 5391487    | 4736758   | 0         | 57335693   | 6241770    | 9089468    | 28575850   | 23046621   | 13208103   | 16421048   | 16869400   |
| 975459550  | 256556841  | 139204356 | 272763254 | 1499911101 | 707845665  | 600457661  | 1888743812 | 930532569  | 787377924  | 805885273  | 555892266  |
| 331933140  | 743824461  | 84450555  | 80958931  | 155755336  | 64297130   | 255621912  | 686998055  | 361586204  | 472111642  | 323753737  | 246827106  |
| 1390671348 | 273032357  | 522588043 | 0         | 316472858  | 1164223401 | 894855597  | 3112887457 | 2382430774 | 1624356852 | 1168151869 | 994246866  |
| 31436639   | 0          | 0         | 5597144   | 1094436    | 35695296   | 35823076   | 61181624   | 54821441   | 37063965   | 26271362   | 23090906   |
| 12518947   | 1299576    | 1021294   | 1016969   | 4056919    | 59782208   | 16799440   | 13871668   | 28982761   | 13390108   | 15273989   | 17987198   |
| 67772682   | 5714310    | 11510359  | 1120704   | 16808507   | 55796710   | 60511574   | 160220212  | 138823416  | 87810771   | 60608924   | 55513517   |
| 583434926  | 25742896   | 11483173  | 63389245  | 133357962  | 376966856  | 157469129  | 392605649  | 561041577  | 151813197  | 245730461  | 215513199  |
| 82194019   | 58721006   | 55501456  | 29000890  | 222754797  | 60802796   | 81415274   | 39240747   | 61847495   | 63992247   | 75547073   | 54218650   |
| 2232742    | 0          | 0         | 626916    | 9035032    | 8645437    | 7225072    | 8746254    | 36578233   | 23814073   | 9690376    | 11815694   |
| 54350812   | 74968434   | 5382927   | 48441229  | 12118930   | 19255145   | 17758885   | 90909272   | 22746581   | 6809600    | 35274181   | 30126413   |
| 209011927  | 16642930   | 9711259   | 8053383   | 29548383   | 137314905  | 89603709   | 620326951  | 110882695  | 70738389   | 130183453  | 183940376  |
| 219693756  | 1463577    | 10030074  | 1494977   | 1486457733 | 355033594  | 188892768  | 657497595  | 350551111  | 339240931  | 361035612  | 445528737  |
| 108290462  | 109599545  | 85103262  | 27814975  | 58576933   | 79761673   | 68265111   | 73453279   | 56276048   | 55614115   | 72275540   | 25002666   |
| 20521665   | 172760339  | 146983214 | 4908962   | 36065534   | 17715593   | 7792137    | 9504151    | 4237677    | 7650298    | 42813957   | 62722655   |
| 4409386    | 1731899    | 2453828   | 905883    | 4383766    | 6954832    | 6559195    | 16724139   | 8965247    | 6205771    | 5929394    | 4557059    |
| 62799561   | 18552854   | 40653323  | 4170020   | 69122960   | 34843091   | 38929372   | 132450207  | 71872688   | 65754211   | 53914829   | 35636849   |
| 0          | 7842776    | 2287116   | 4548553   | 0          | 9034054    | 0          | 0          | 0          | 787760     | 2450026    | 3490269    |
| 7925526    | 0          | 403457    | 0         | 0          | 974978     | 0          | 28194778   | 1998593    | 597088     | 4009442    | 8834701    |
| 6278072    | 0          | 2164504   | 0         | 13795218   | 18281918   | 7377100    | 34463574   | 49168086   | 20677784   | 15220626   | 16121733   |
| 72118336   | 19422638   | 17947520  | 5105021   | 15383103   | 445755345  | 222022695  | 291000091  | 634250449  | 510147436  | 223315263  | 236329110  |
| 112734756  | 234189687  | 109008160 | 398574    | 1186956    | 33945792   | 42242821   | 215077359  | 72857586   | 49792769   | 87143446   | 81976332   |
| 1444061    | 0          | 2899907   | 8413986   | 1355554    | 814078     | 1784477    | 29358287   | 2273928    | 4248530    | 5259281    | 8790803    |
| 129023311  | 106191001  | 136324610 | 62703143  | 198496875  | 315600767  | 213824909  | 391546778  | 276932866  | 296154190  | 212679845  | 105696843  |
| 255553     | 158059     | 2191257   | 2687659   | 1807661    | 16739071   | 10679033   | 7614703    | 10975009   | 27033604   | 8014161    | 8670537    |
| 178205241  | 3723269    | 30505345  | 49751     | 2125159443 | 8360870    | 16856667   | 37814715   | 67111893   | 27942095   | 249572929  | 661077110  |
| 12440226   | 5666347    | 4802849   | 3350      | 394502     | 8437682    | 13085263   | 28766290   | 37205045   | 23625426   | 13442698   | 12540258   |
| 42334723   | 0          | 0         | 0         | 4422426    | 21272871   | 18860735   | 30841114   | 32022061   | 33366608   | 18312054   | 16181790   |
| 40635902   | 11101031   | 19379997  | 6330455   | 43703343   | 38028255   | 46043143   | 98804724   | 75297679   | 43778949   | 42310348   | 28113510   |
| 255099535  | 54233012   | 33631284  | 8120862   | 15088284   | 354935190  | 178708796  | 665474507  | 397790186  | 237732062  | 220081372  | 210979005  |
| 59754734   | 2066197    | 1816332   | 305710    | 2028409    | 70878644   | 44306342   | 112540884  | 61417066   | 58216368   | 41333069   | 38458730   |
| 0          | 0          | 0         | 1771192   | 684025     | 0          | 0          | 0          | 0          | 0          | 245522     | 577562     |
| 0          | 178554     | 268529    | 2009929   | 0          | 3291956705 | 1640701939 | 1793236869 | 1953979971 | 6792699573 | 1547503207 | 2179595474 |
| 1670247166 | 1019744508 | 987212736 | 320640213 | 1022352295 | 1073573627 | 1176723829 | 2301822224 | 2034508721 | 2113469344 | 1372029466 | 629740908  |
| 51999039   | 39854354   | 48144053  | 0         | 74600799   | 51232603   | 39031096   | 100366355  | 84971509   | 51586394   | 54178620   | 27739051   |
| 1514617869 | 741575625  | 625286084 | 270115808 | 172535145  | 1649775899 | 1089806228 | 2659443698 | 1547735224 | 1136748775 | 1140764035 | 744912409  |
| 20505906   | 20411797   | 6278799   | 1204921   | 0          | 4219857    | 7862367    | 35447082   | 20233476   | 8235313    | 12439952   | 11273461   |
| 12916244   | 207029     | 539300    | 276512    | 226901     | 8359440    | 9293536    | 38743345   | 25207669   | 9556749    | 10532673   | 12657778   |
| 43267227   | 13571908   | 33302546  | 442193    | 24981684   | 46178047   | 31736293   | 53194404   | 22923810   | 10990102   | 28058821   | 16773481   |
| 1966448    | 501246     | 233215    | 393003    | 0          | 392997128  | 807763315  | 783873984  | 863012666  | 2966340334 | 581708134  | 917818269  |
| 9601481    | 3687916    | 25632202  | 2098515   | 65578      | 322437     | 25995635   | 2072159    | 1962947    | 3027853    | 7446672    | 10032556   |
| 13887386   | 8014205    | 4374461   | 0         | 1970341    | 6078384    | 14923324   | 46338858   | 28483145   | 20632363   | 14470247   | 14260087   |
| 4025869    | 0          | 0         | 1688740   | 0          | 38475229   | 16284018   | 18465872   | 17817392   | 38553164   | 13531028   | 15196780   |

| Null 1     | Null 2     | Null 3     | Null 4     | Null 5     | Null 6     | Null 7     | Null 8     | Null 9     | Null 10    | AVG_Null   | StdDev_Null | p value | Null/WT |
|------------|------------|------------|------------|------------|------------|------------|------------|------------|------------|------------|-------------|---------|---------|
| 988345992  | 836430536  | 1115052367 | 1338578221 | 897170594  | 1142707642 | 1284770436 | 906517733  | 968490302  | 1577446801 | 1105551062 | 235363298   | 0.5419  | 0.81    |
| 8323053    | 10800305   | 24900115   | 11189492   | 9707638    | 15204997   | 8191759    | 3000724    | 6691040    | 8222766    | 10623189   | 5930544     | 0.5485  | 0.82    |
| 175941497  | 156612533  | 175423569  | 284986783  | 107744934  | 104485427  | 73720112   | 53328483   | 113348949  | 65378866   | 131097115  | 69551254    | 0.5500  | 0.81    |
| 3718685    | 6589330    | 28411179   | 19561130   | 12276473   | 20910775   | 13732146   | 15814022   | 13452294   | 16337520   | 15080355   | 7050735     | 0.5528  | 1.18    |
| 12454899   | 1533179    | 4238575    | 11976202   | 11285789   | 10480265   | 11736733   | 5065795    | 1538569    | 4817935    | 7512794    | 4480168     | 0.5563  | 1.24    |
| 17806643   | 5049542    | 12966123   | 16442322   | 16385182   | 20604002   | 14422910   | 11286583   | 4025440    | 11324400   | 13031315   | 5330683     | 0.5521  | 0.79    |
| 840848610  | 863832008  | 1048634395 | 1003018659 | 660965299  | 543652838  | 501777406  | 408391490  | 464069071  | 587227823  | 692241760  | 230487511   | 0.5578  | 0.86    |
| 279275905  | 240379482  | 237824703  | 407812767  | 295291943  | 282778689  | 228647050  | 296182065  | 247822304  | 245792294  | 276180720  | 52583711    | 0.5585  | 0.85    |
| 1463628613 | 1059891390 | 2389425603 | 2074458833 | 1612402181 | 1344815623 | 1023911080 | 996592180  | 693132609  | 1084777408 | 1374303552 | 526871761   | 0.5695  | 1.18    |
| 0          | 13141444   | 32232173   | 33327795   | 13888112   | 26818273   | 23015842   | 28697718   | 21042656   | 24204025   | 21636804   | 10191801    | 0.5687  | 0.82    |
| 34978781   | 13479392   | 33860523   | 14449129   | 5193368    | 58055694   | 8989768    | 11397192   | 8222275    | 9135500    | 19776162   | 17025358    | 0.5725  | 1.29    |
| 96722065   | 57593413   | 120472583  | 106477428  | 80688927   | 62275345   | 51559842   | 49842145   | 43969767   | 49719584   | 71932110   | 27320965    | 0.5699  | 1.19    |
| 128201831  | 132656986  | 506833169  | 245813901  | 335094474  | 161668898  | 83544467   | 172855267  | 116795878  | 119502762  | 200296763  | 130535621   | 0.5756  | 0.82    |
| 104856150  | 58252444   | 82909131   | 80994112   | 68212596   | 41390395   | 52033572   | 46218779   | 73135249   | 42659155   | 65066158   | 20721538    | 0.5751  | 0.86    |
| 3422698    | 3021122    | 17465000   | 10338524   | 6188385    | 11175143   | 5180645    | 6319291    | 5829471    | 5289525    | 7422980    | 4392686     | 0.5765  | 0.77    |
| 55675234   | 8793823    | 31879138   | 71277495   | 34466967   | 32317859   | 18504241   | 10478993   | 6622936    | 17801531   | 28781822   | 21174621    | 0.5840  | 0.82    |
| 108322149  | 56423049   | 107866960  | 92227504   | 58559891   | 165911740  | 104626936  | 101275896  | 64059919   | 113380490  | 97265453   | 32610727    | 0.5842  | 0.75    |
| 258755275  | 273972562  | 394104921  | 438146561  | 316172113  | 267391173  | 187306484  | 215361924  | 214219477  | 251759033  | 281718952  | 80173832    | 0.5863  | 0.78    |
| 49836155   | 39010948   | 52519201   | 64200515   | 57036621   | 139233962  | 93299579   | 99691352   | 81419667   | 114659512  | 79090751   | 32301385    | 0.6042  | 1.09    |
| 132766708  | 19620552   | 33965837   | 29133653   | 25011671   | 13588336   | 11039925   | 11354318   | 18146556   | 12595205   | 30722276   | 36704214    | 0.6052  | 0.72    |
| 3379462    | 4781551    | 35092289   | 15787998   | 4514730    | 4039353    | 2035981    | 2808886    | 1274015    | 4246267    | 7796053    | 10411624    | 0.6098  | 1.31    |
| 76626348   | 52390517   | 205358541  | 70702610   | 68049071   | 43773241   | 33483188   | 20912686   | 31779253   | 39731182   | 64280664   | 52874107    | 0.6134  | 1.19    |
| 0          | 0          | 0          | 33033942   | 0          | 0          | 0          | 0          | 9683738    | 0          | 4271768    | 10554283    | 0.6106  | 1.74    |
| 6962728    | 2873822    | 39526020   | 15288010   | 345372     | 0          | 0          | 0          | 75695      | 0          | 6507165    | 12602738    | 0.6141  | 1.62    |
| 20781319   | 10514774   | 23425426   | 17836674   | 3841517    | 2036153    | 7203565    | 15701531   | 7294155    | 14768762   | 12340388   | 7265773     | 0.6128  | 0.81    |
| 104035470  | 140745376  | 135006567  | 189572655  | 117319988  | 316552136  | 193260956  | 218162129  | 192138223  | 227348511  | 183414201  | 63164425    | 0.6123  | 0.82    |
| 109339689  | 49598075   | 93713816   | 84638550   | 100751678  | 83631005   | 76227109   | 44315700   | 31630144   | 59328896   | 73317466   | 25919693    | 0.6173  | 0.84    |
| 0          | 0          | 9890598    | 0          | 0          | 4744554    | 6458307    | 0          | 10663668   | 5184155    | 3694128    | 4296871     | 0.6191  | 0.70    |
| 143414876  | 217513430  | 232546248  | 284295386  | 184035298  | 218353028  | 152831956  | 156122719  | 157166473  | 196808251  | 194308766  | 44642169    | 0.6188  | 0.91    |
| 0          | 557514     | 2264617    | 548484     | 1962960    | 15328856   | 23465338   | 12102856   | 22925051   | 21924286   | 10107996   | 10144428    | 0.6258  | 1.26    |
| 518478732  | 38993166   | 166813446  | 95905662   | 297326692  | 152558109  | 101995811  | 36960643   | 14324145   | 17726064   | 144108247  | 157642064   | 0.6295  | 0.58    |
| 13343660   | 5174478    | 16075850   | 14393423   | 15793566   | 14211433   | 10969552   | 8590552    | 4869968    | 10774084   | 11419657   | 4105202     | 0.6336  | 0.85    |
| 20893655   | 18817486   | 26195132   | 26540777   | 15730432   | 24380187   | 22103333   | 16838458   | 20679080   | 16536735   | 20871527   | 3944796     | 0.6329  | 1.14    |
| 35719130   | 56061885   | 45311265   | 50522254   | 19211187   | 38982640   | 25608167   | 16422055   | 36111708   | 52296831   | 37624712   | 13829929    | 0.6420  | 0.89    |
| 218383787  | 105514509  | 215379470  | 238502076  | 163188862  | 303881947  | 192664260  | 56224189   | 151991291  | 222590138  | 186832053  | 70661499    | 0.6422  | 0.85    |
| 42528459   | 42673323   | 58440285   | 51840382   | 32542194   | 53989153   | 44907007   | 41263327   | 47868282   | 55441459   | 47149387   | 7887963     | 0.6451  | 1.14    |
| 0          | 0          | 0          | 0          | 401301     | 0          | 0          | 0          | 0          | 4144901    | 454620     | 1302751     | 0.6482  | 1.85    |
| 0          | 0          | 634787     | 397971     | 0          | 5846420066 | 2949553091 | 3449363999 | 3722297817 | 4046030396 | 2001469813 | 2234717294  | 0.6511  | 1.29    |
| 1486672743 | 1335913664 | 1912964088 | 1259881958 | 689810410  | 2641650761 | 746719622  | 2047122323 | 1454386800 | 1363342358 | 1493846473 | 587104284   | 0.6599  | 1.09    |
| 50180018   | 42634736   | 88744132   | 66678536   | 49854242   | 53708689   | 37213649   | 38435808   | 27470107   | 41655230   | 49657515   | 17386508    | 0.6675  | 0.92    |
| 1242419845 | 922194673  | 1282675106 | 1208207795 | 1134188873 | 1667149004 | 1265740257 | 1121866480 | 1092741364 | 1551520640 | 1248870404 | 218594429   | 0.6649  | 1.09    |
| 32320657   | 4083502    | 9944077    | 10480951   | 17561476   | 11882637   | 9145934    | 4366253    | 1793513    | 3189483    | 10476848   | 9055972     | 0.6728  | 0.84    |
| 14116874   | 5069069    | 19389991   | 14400328   | 17116483   | 13018725   | 10551658   | 12253415   | 5288689    | 12148361   | 12335359   | 4548622     | 0.6767  | 1.17    |
| 18021983   | 17049486   | 21601221   | 22205240   | 64094483   | 37495469   | 15075586   | 19439628   | 15102799   | 20684153   | 25077005   | 15135369    | 0.6813  | 0.89    |
| 812485     | 1378079    | 6915941    | 0          | 768467     | 1934035009 | 1202542059 | 1025344826 | 1402314398 | 1829753976 | 740386524  | 821296066   | 0.6885  | 1.27    |
| 1088824    | 20646605   | 681510     | 3590684    | 706350     | 1461076    | 1129911    | 2126876    | 24098021   | 1819276    | 5734913    | 8846791     | 0.6905  | 0.77    |
| 16913328   | 6866624    | 13405093   | 12747170   | 22839726   | 14136992   | 16049648   | 10866293   | 3697287    | 7665869    | 12518803   | 5555822     | 0.6915  | 0.87    |
| 0          | 23656514   | 23528656   | 24125723   | 17599886   | 14161960   | 11825144   | 16529114   | 12588327   | 12673970   | 15668929   | 7322595     | 0.6933  | 1.16    |

| Accession # | Protein                                                | PEPTIDE                             | Xcorr | MZ     | % Coverage | MW [kDa] |
|-------------|--------------------------------------------------------|-------------------------------------|-------|--------|------------|----------|
| 157951694   | complement C2                                          | DHENATGTNTYEVLIR                    | 5.1   | 917.4  | 25.7%      | 84.7     |
| 13507644    | carboxypeptidase N catalytic chain                     | GMVLDENSNLTGAVISVTGINHDVTSGEHGDYFR  | 9.9   | 934.9  | 30.2%      | 51.8     |
| 125347464   | afamin                                                 | FNETTOR                             | 2.2   | 448.7  | 30.6%      | 69.3     |
| 26986583    | coiled-coil and C2 domain-containing protein 2A        | LEQLQOEFNFVSEELNR                   | 2.3   | 752.4  | 7.1%       | 187.4    |
| 76559942    | carbohydrate sulfotransferase 11                       | KNATQEALR                           | 1.8   | 516.3  | 19.0%      | 41.6     |
| 21389311    | intercellular adhesion molecule 1                      | TELDLRPOGLALFSNVSEAR                | 5.5   | 740.1  | 5.4%       | 58.8     |
| 124494256   | prolow-density lipoprotein receptor-related protein 1  | FNSTEYQVVTR                         | 3.1   | 672.8  | 13.6%      | 504.4    |
| 111378397   | phosphatidylinositol-glycan-specific phospholipase D   | LTSFMLENGTSDCNLPENPLFISCDGR         | 3.3   | 1036.1 | 27.3%      | 93.6     |
| 161702988   | apolipoprotein B                                       | SKPTVSSSIELNYDFNSSK                 | 2.7   | 702.3  | 23.8%      | 509.1    |
| 153791270   | laminin subunit gamma-1                                | TANETSAEAYNLLLR                     | 1.9   | 833.9  | 7.7%       | 177.1    |
| 6755987     | vitronectin                                            | NGSLFAFR                            | 2.6   | 456.7  | 33.1%      | 54.8     |
| 160333710   | serine protease inhibitor A3M                          | YTGNASALFILPDQGR                    | 4.4   | 862.4  | 77.3%      | 47.0     |
| 110347469   | alpha-2-macroglobulin                                  | SLGEVNFTATAEALQSPELCGNK             | 5.4   | 813.4  | 48.7%      | 165.7    |
| 148277054   | complement C1s-A                                       | GVDSCHGDSGGAFQVQPNVTVPK             | 3.7   | 816.7  | 12.4%      | 77.5     |
| 110347469   | alpha-2-macroglobulin                                  | ACVSLNHVNETVMLSILTLEYAMQQT          | 6.3   | 1005.5 | 48.7%      | 165.7    |
| 31982171    | murinoglobulin-1                                       | TIEQERNASVYTK                       | 4.1   | 843.9  | 43.6%      | 165.2    |
| 100815972   | gamma-glutamyl hydrolase                               | HFPTTELLDSLALENLTANFHK              | 2.5   | 804.8  | 26.2%      | 35.4     |
| 18252782    | antithrombin-III                                       | LFGDKSLTFNESYQDVSEVYGA              | 4.6   | 900.1  | 67.3%      | 52.0     |
| 160333372   | lumican                                                | AFENVTDLQWLILDHNLLENSK              | 2.9   | 872.1  | 48.5%      | 38.2     |
| 7304875     | alpha-2-HS-glycoprotein 1                              | RPFVVYEMEDTLETTCCHALDPTPLANCSVR     | 8.3   | 924.4  | 46.7%      | 37.3     |
| 148277039   | alpha-2-macroglobulin-P                                | VSMESVRGNQSLFTDLVVDK                | 1.9   | 1113.1 | 18.3%      | 164.2    |
| 224967112   | coagulation factor XIII B chain                        | TYENGSSVEYR                         | 3.2   | 653.3  | 29.2%      | 76.1     |
| 6679182     | alpha-1-acid glycoprotein 1                            | ESQTIGDQCYYNSTHLGFQR                | 5.1   | 781.0  | 48.8%      | 23.9     |
| 7304867     | complement factor D                                    | LSQNASLGPVHRPLPLQYEDK               | 6.0   | 591.6  | 27.0%      | 28.0     |
| 161377465   | heparin cofactor 2                                     | DFVNASSK                            | 2.0   | 434.7  | 25.1%      | 54.5     |
| 75677437    | apolipoprotein D                                       | GNCIQANYSLMENGNIIVLNK               | 2.3   | 800.4  | 42.9%      | 21.5     |
| 225735645   | sulfated glycoprotein 1                                | DNATQEEILHYLEK                      | 2.1   | 568.6  | 31.2%      | 61.4     |
| 18252782    | antithrombin-III                                       | SLTFNESYQDVSEVYGA                   | 5.3   | 1069.0 | 67.3%      | 52.0     |
| 247269929   | carboxylesterase 1C                                    | NIQAVNEIATLSQCNDTSSAAMVQCLR         | 1.9   | 1023.2 | 48.2%      | 61.0     |
| 160333710   | serine protease inhibitor A3M                          | FNLTTETSEADHQGFHLLQR                | 6.5   | 805.4  | 77.3%      | 47.0     |
| 147904569   | carboxypeptidase N                                     | LQLLNLSR                            | 2.3   | 479.3  | 28.3%      | 60.4     |
| 219521935   | histocompatibility 2                                   | TLLSYNQSAGGSHTIQVISGCEVGSDDR        | 4.5   | 1019.8 | 35.9%      | 39.6     |
| 33563252    | fibrinogen, alpha polypeptide 2                        | MKGLIDEANQDFTNRINK                  | 2.2   | 531.5  | 50.6%      | 61.3     |
| 160358795   | interferon alpha/beta receptor 2 b                     | VNNVTGNFTFVLR                       | 3.5   | 741.4  | 18.6%      | 27.7     |
| 160358795   | interferon alpha/beta receptor 2 b                     | VNNVTGNFTFVLR                       | 2.1   | 741.4  | 18.6%      | 27.7     |
| 13385184    | coiled-coil domain-containing glutamate-rich protein 1 | NTTQFIMNQVYEDMR                     | 1.7   | 953.9  | 3.7%       | 46.2     |
| 247269929   | carboxylesterase 1C                                    | NIQAVNEIATLSQCNDTSSAAMVQCLR         | 3.1   | 1017.5 | 48.2%      | 61.0     |
| 188219651   | hepatocyte growth factor activator                     | FCNIVPTEHCFLGNGTEYR                 | 4.6   | 772.7  | 12.9%      | 70.5     |
| 283483997   | maltase-glucoamylase                                   | YGYENDEIANLYDEMVAK                  | 3.5   | 1128.5 | 22.4%      | 208.4    |
| 125347464   | afamin                                                 | HVEDKFNETTOR                        | 4.6   | 502.2  | 30.6%      | 69.3     |
| 18252782    | antithrombin-III                                       | LGACNDTLKQLMEVFKFDTISEK             | 3.4   | 677.1  | 67.3%      | 52.0     |
| 124486702   | alpha-1B-glycoprotein                                  | GTAGFLIYKPGNYSCSYLTHAAGEPSEPSDIVTIK | 3.4   | 1249.6 | 29.7%      | 56.5     |
| 6753798     | prothrombin                                            | SRYPHKPEINSTTHPGADLK                | 4.5   | 450.8  | 31.7%      | 70.2     |
| 13384648    | biotinidase                                            | GVQIIVFPEDGIHGFNFR                  | 5.6   | 716.4  | 27.8%      | 59.2     |
| 110735411   | selenoprotein P                                        | LESQGYFNISYIVVNHQGSQSLK             | 5.6   | 903.8  | 26.6%      | 42.7     |
| 218156291   | complement factor B                                    | IVLDPSGSMNIYLVLDGSDSIGSSNFTGAK      | 6.2   | 1025.5 | 16.7%      | 79.6     |
| 31981720    | protein Z-dependent protease inhibitor                 | ASQQLSNETSSFGNLLR                   | 5.5   | 667.7  | 43.1%      | 51.8     |
| 31982171    | murinoglobulin-1                                       | SLDEEAIKENNSIHWK                    | 4.2   | 479.5  | 43.6%      | 165.2    |
| 160415217   | zinc-alpha-2-glycoprotein                              | DTTGSHTFQGMFGCEITNRR                | 5.2   | 764.0  | 37.8%      | 35.3     |

| WT 1       | WT 2       | WT 3       | WT 4      | WT 5       | WT 6       | WT 7       | WT 8        | WT 9       | WT 10      | AVG_WT     | StdDev_WT  |
|------------|------------|------------|-----------|------------|------------|------------|-------------|------------|------------|------------|------------|
| 27289911   | 32806833   | 19098737   | 6209108   | 12765595   | 24481101   | 13354344   | 41653963    | 23618765   | 32702449   | 23398081   | 10814664   |
| 510464999  | 171935699  | 160664584  | 9439232   | 345261452  | 536608978  | 328713387  | 921265647   | 723823942  | 490047170  | 419822509  | 275183594  |
| 28953303   | 15264281   | 19156388   | 9204518   | 25133148   | 40632775   | 37652892   | 41140841    | 24890044   | 27894345   | 26992253   | 10686337   |
| 22844532   | 16528956   | 26408748   | 8111806   | 98174      | 16733711   | 8577385    | 43944461    | 32141062   | 11233098   | 18662193   | 12993469   |
| 0          | 14849166   | 35027047   | 12110764  | 106778970  | 91218296   | 84355745   | 33085072    | 0          | 108168789  | 48559385   | 44281235   |
| 29091466   | 78800      | 7880487    | 0         | 557328     | 35026879   | 11880151   | 33731514    | 52509365   | 17782532   | 18853852   | 18053445   |
| 7054939    | 6102359    | 206043     | 673847    | 0          | 11879775   | 8811063    | 42768641    | 14272674   | 5717182    | 9748652    | 12567424   |
| 13991867   | 15243814   | 9294100    | 0         | 2902528    | 21582361   | 12363272   | 47980848    | 41813848   | 25571550   | 19074419   | 15662160   |
| 31185285   | 8935376    | 11069960   | 14003601  | 18032321   | 15731125   | 18179949   | 52222446    | 21178167   | 18941327   | 20947956   | 12562976   |
| 561954746  | 48524358   | 137095769  | 2281450   | 426348501  | 595815277  | 391185994  | 1050460713  | 647291770  | 514422135  | 437538071  | 316128036  |
| 45862887   | 8506082    | 29937672   | 2050033   | 61594209   | 68404052   | 33085069   | 175845682   | 33892374   | 24382233   | 48356029   | 49357699   |
| 953222830  | 479942134  | 631594928  | 237640056 | 115613447  | 1006091545 | 777999227  | 1892345149  | 1174183378 | 864341383  | 813297408  | 507441150  |
| 3351835295 | 672317905  | 1176357381 | 559626    | 717918401  | 2917863070 | 2540025092 | 8494594932  | 6423464802 | 4543114885 | 3083805139 | 2738857873 |
| 16842207   | 4280574    | 11654548   | 712444    | 37511936   | 19681990   | 10956965   | 20979798    | 12344402   | 20650820   | 15561568   | 10275477   |
| 243824271  | 1895000    | 115413307  | 434130    | 286544844  | 24146347   | 52864875   | 187980142   | 222454753  | 156181571  | 129173924  | 105733566  |
| 135624359  | 98980534   | 89117186   | 28179627  | 230495438  | 141456835  | 91906904   | 200277009   | 161803255  | 57902559   | 123574371  | 62760363   |
| 3895907    | 3993310    | 528266     | 0         | 0          | 4853554    | 2708529    | 6149603     | 5598790    | 1794503    | 2952246    | 2297910    |
| 36421496   | 36454698   | 44225267   | 692268    | 1639384    | 13273457   | 10088900   | 31633992    | 9394783    | 292643     | 18411689   | 16969372   |
| 3920557    | 4581816    | 1360455    | 120800    | 1140747    | 4450906    | 6440061    | 41702321    | 48499499   | 11554644   | 12377181   | 17618375   |
| 1491504838 | 63482862   | 142929684  | 5376969   | 135658150  | 1302896908 | 981007353  | 3033586411  | 2756849651 | 1436414934 | 1134970776 | 1101108594 |
| 523455705  | 18057627   | 41802779   | 54013390  | 34493975   | 181606414  | 983492942  | 1106546103  | 1342076841 | 1508491844 | 579403762  | 598563181  |
| 202958340  | 196388009  | 192259626  | 79555971  | 277467476  | 482422609  | 351899935  | 392638609   | 322325683  | 328109825  | 282602608  | 117226860  |
| 4708484915 | 2715262857 | 2060383302 | 552325864 | 144783502  | 2349487510 | 3137945819 | 10336323116 | 3955037383 | 3111815432 | 3307184970 | 2833746065 |
| 199113072  | 16291610   | 9841022    | 4073594   | 90834462   | 720093370  | 445941769  | 690293953   | 557006904  | 654530796  | 338802055  | 304225604  |
| 139323948  | 128228292  | 133416731  | 55932805  | 148143571  | 211336355  | 166098886  | 247653835   | 208774895  | 226444512  | 166535383  | 57577707   |
| 39885774   | 2199446    | 225599     | 1886676   | 8753689    | 31870766   | 18304572   | 57459973    | 62462571   | 40043979   | 26309304   | 23361173   |
| 47185196   | 694033     | 954970     | 11759     | 0          | 54708856   | 19850618   | 0           | 53865022   | 53281188   | 23055164   | 25905517   |
| 1897415761 | 803377017  | 788732589  | 99347     | 1413962534 | 2151432057 | 1501259814 | 3743153291  | 2964580656 | 1933183584 | 1719719665 | 1090983645 |
| 7196814    | 5124515    | 5121839    | 0         | 1460373    | 31212139   | 11250890   | 31049241    | 24328221   | 13928386   | 13067242   | 11783182   |
| 400323142  | 24434195   | 15587451   | 216739    | 325347738  | 191907134  | 93645593   | 753016378   | 206784922  | 155329596  | 216659289  | 230230836  |
| 186307639  | 31623669   | 149596224  | 13503033  | 210751825  | 196410275  | 144337154  | 355433600   | 236836391  | 189407029  | 171420684  | 98063206   |
| 9950363    | 0          | 0          | 0         | 6698318    | 6081022    | 5298538    | 20784021    | 27608669   | 16649291   | 9307022    | 9511028    |
| 3802060    | 3272784    | 4202609    | 1360192   | 5859013    | 13190874   | 11361148   | 7275230     | 2537694    | 5766468    | 5862807    | 3814849    |
| 9233098    | 0          | 3450043    | 52285072  | 0          | 1861083    | 4976925    | 17115095    | 15117678   | 11317193   | 11535619   | 15556205   |
| 9233098    | 0          | 3450043    | 52285072  | 0          | 1861083    | 4976925    | 17115095    | 15117678   | 11317193   | 11535619   | 15556205   |
| 2532525539 | 1751800354 | 1900968320 | 637157877 | 1431257032 | 1122585734 | 2284521654 | 4627128305  | 2997515817 | 2237913442 | 2152337408 | 1110954857 |
| 126172991  | 88703857   | 46591682   | 10771023  | 220199286  | 162186838  | 145402400  | 344796874   | 355197142  | 167157168  | 166717926  | 114042729  |
| 82609340   | 27231988   | 16029001   | 17791138  | 44647856   | 178400423  | 87683224   | 172547391   | 123347589  | 134534554  | 88482250   | 61863216   |
| 48440208   | 3057634    | 18196541   | 2051658   | 49913180   | 73056186   | 35901278   | 74310923    | 81561643   | 64388972   | 45087822   | 29438820   |
| 250588306  | 169725606  | 179927974  | 66948622  | 271104360  | 320512064  | 471270834  | 432720967   | 387804557  | 296246893  | 284685018  | 125488231  |
| 57622600   | 32414399   | 25858549   | 123286    | 711741     | 42809444   | 31341518   | 80809123    | 35957205   | 8492954    | 31614082   | 25289098   |
| 0          | 0          | 0          | 0         | 0          | 53492342   | 21637001   | 40849224    | 50588823   | 156023572  | 32259096   | 48869828   |
| 14808417   | 8281982    | 5463061    | 1542431   | 7356676    | 11147691   | 4505978    | 15456994    | 10027105   | 9920830    | 8851117    | 4387632    |
| 40864224   | 7301197    | 24492425   | 215404    | 3657162    | 26349954   | 27893397   | 57472757    | 54865140   | 42107358   | 28521902   | 20440146   |
| 174850119  | 3530034    | 38374600   | 34244901  | 136196548  | 110195310  | 112033152  | 434593807   | 300936566  | 178243742  | 152319878  | 131515210  |
| 108589999  | 177671239  | 49321668   | 686184    | 2850390    | 67032094   | 104663283  | 357764088   | 248524471  | 145883449  | 126298687  | 111940330  |
| 112336991  | 30498873   | 22320523   | 1593360   | 1406484    | 87653546   | 73886322   | 265121630   | 145040997  | 106963214  | 84682194   | 80451224   |
| 3841526    | 1645268    | 1214567    | 786628    | 10239140   | 22901772   | 19600239   | 132407405   | 80729938   | 17257324   | 29062381   | 43376514   |
| 217586073  | 26506474   | 34683737   | 26556924  | 23453029   | 217303912  | 141442397  | 331119988   | 264234139  | 177805852  | 146069252  | 113256981  |

| Null 1     | Null 2     | Null 3     | Null 4     | Null 5     | Null 6     | Null 7     | Null 8     | Null 9     | Null 10    | AVG_Null   | StdDev_Null | p value | Null/WT |
|------------|------------|------------|------------|------------|------------|------------|------------|------------|------------|------------|-------------|---------|---------|
| 54798153   | 20099749   | 35115467   | 39188946   | 26488193   | 22152213   | 14457834   | 14384661   | 13743585   | 15431012   | 25585981   | 13599744    | 0.6952  | 1.09    |
| 570447258  | 404310968  | 693045085  | 532955787  | 451538934  | 556755121  | 419014612  | 325632570  | 244265687  | 382236338  | 458020236  | 131929805   | 0.6969  | 1.09    |
| 19364088   | 42772747   | 44334941   | 37067991   | 23936798   | 25093388   | 22774321   | 23549080   | 21121842   | 27215276   | 28723047   | 9169061     | 0.7021  | 1.06    |
| 47683601   | 15004648   | 15800389   | 17578314   | 20316875   | 14875339   | 11521294   | 12637384   | 5738061    | 4352777    | 16550868   | 12002635    | 0.7103  | 0.89    |
| 46236807   | 42834430   | 15251984   | 81514993   | 61983691   | 47487424   | 39736315   | 29253601   | 35400618   | 29059021   | 42875888   | 18547062    | 0.7125  | 0.88    |
| 17006854   | 20072393   | 26952552   | 31596450   | 13947649   | 25839431   | 13321450   | 26103413   | 15997520   | 19625427   | 21046314   | 6232324     | 0.7208  | 1.12    |
| 8141163    | 3849500    | 19402830   | 7137558    | 7781607    | 7870908    | 3001784    | 8530374    | 4972501    | 11489704   | 8217793    | 4645334     | 0.7221  | 0.84    |
| 22324310   | 12189985   | 34057589   | 22577424   | 17925250   | 17715038   | 12794888   | 10423955   | 8137768    | 12857867   | 17100407   | 7684355     | 0.7246  | 0.90    |
| 21070251   | 11673441   | 31499481   | 19897401   | 11838836   | 27878770   | 17697865   | 21693108   | 15823438   | 14405355   | 19347794   | 6532497     | 0.7250  | 0.92    |
| 463927886  | 437414086  | 755427954  | 641646051  | 435525713  | 753580799  | 307203669  | 346989863  | 281667546  | 348794211  | 477217778  | 177923165   | 0.7334  | 1.09    |
| 50088709   | 69690784   | 115059408  | 69598099   | 25851607   | 58823980   | 47296713   | 23274044   | 30270314   | 54879008   | 54483267   | 27078502    | 0.7347  | 1.13    |
| 405084493  | 456928061  | 648548072  | 701428675  | 448870050  | 1240883694 | 835355682  | 901416340  | 812862326  | 1068140844 | 751951824  | 275780762   | 0.7408  | 0.92    |
| 3998692770 | 2918202598 | 5317894467 | 4705825837 | 3877416351 | 3107028859 | 2693571292 | 2350958901 | 1837619977 | 3143512491 | 3395072354 | 1074653621  | 0.7418  | 1.10    |
| 19265558   | 15495920   | 21441428   | 12341599   | 17890198   | 13896196   | 10683230   | 8753393    | 11977575   | 12510404   | 14425550   | 4031259     | 0.7486  | 0.93    |
| 542247862  | 56430406   | 124821401  | 73966016   | 333269518  | 172149122  | 100907648  | 41241266   | 18333252   | 27791646   | 149115814  | 166536216   | 0.7529  | 1.15    |
| 148725101  | 227874892  | 82518182   | 300046138  | 130174250  | 101577272  | 90662122   | 65873108   | 117600599  | 64337298   | 132938896  | 75972882    | 0.7672  | 1.08    |
| 8072583    | 573952     | 1469971    | 3498454    | 3512065    | 3762827    | 3300805    | 1367232    | 595810     | 254274     | 2640797    | 2353146     | 0.7680  | 0.89    |
| 19190983   | 10082025   | 20778557   | 32893753   | 25449224   | 19646092   | 12354136   | 8779194    | 3864441    | 13237502   | 16627591   | 8643668     | 0.7704  | 0.90    |
| 31636665   | 2884118    | 26497328   | 12124011   | 9039471    | 5231967    | 5775990    | 6285802    | 2273536    | 2941463    | 10469035   | 10317568    | 0.7710  | 0.85    |
| 2818913107 | 836198412  | 1356886340 | 1402111737 | 1303278210 | 1330985931 | 921826612  | 804040475  | 704692184  | 992704227  | 1247163724 | 609803156   | 0.7813  | 1.10    |
| 345530878  | 338414219  | 615379637  | 723291634  | 639164020  | 521478816  | 748264778  | 242367675  | 262911922  | 791545565  | 522834914  | 210019921   | 0.7812  | 0.90    |
| 265637976  | 304959059  | 381534216  | 360360011  | 225082836  | 271094967  | 210420358  | 208927641  | 243371425  | 241619810  | 271300830  | 60223554    | 0.7893  | 0.96    |
| 2976769468 | 2614538199 | 3139528364 | 3178511770 | 2506882594 | 3639574391 | 3033240631 | 3551041848 | 2835662246 | 3399794467 | 3087554398 | 375294269   | 0.8108  | 0.93    |
| 349572070  | 232012882  | 426302473  | 381292969  | 183567949  | 500450412  | 357457935  | 346384954  | 386898851  | 446744170  | 361068466  | 94646685    | 0.8276  | 1.07    |
| 136359895  | 199758778  | 249659918  | 274903287  | 166482166  | 160413131  | 127683091  | 126939031  | 120483224  | 155652646  | 171833517  | 53480043    | 0.8336  | 1.03    |
| 36196889   | 25492305   | 48531662   | 25542070   | 30541238   | 28814713   | 23492379   | 25324126   | 17476960   | 18414885   | 27982723   | 9057069     | 0.8351  | 1.06    |
| 0          | 49803213   | 0          | 19673191   | 38073337   | 48426906   | 0          | 38424106   | 31156277   | 25512704   | 25106973   | 19597509    | 0.8439  | 1.09    |
| 2310398343 | 1514017906 | 2514989016 | 2652403058 | 2031598673 | 1850366453 | 1391410364 | 1371211023 | 944856601  | 1387114778 | 1796836621 | 566540875   | 0.8450  | 1.04    |
| 12278184   | 6908643    | 20424483   | 15766515   | 12651584   | 16360392   | 11030818   | 11653366   | 5235099    | 10456457   | 12276554   | 4460151     | 0.8449  | 0.94    |
| 268860211  | 89468698   | 170041434  | 152121745  | 121201700  | 323464828  | 384849602  | 186935997  | 86278139   | 228194220  | 201141657  | 99808740    | 0.8472  | 0.93    |
| 162351778  | 142011630  | 198798334  | 149523349  | 167311477  | 211203686  | 161086132  | 155239970  | 144647058  | 159605012  | 165177843  | 22634939    | 0.8467  | 0.96    |
| 10533382   | 7396612    | 10811043   | 8890999    | 8462195    | 10593960   | 9599406    | 6627462    | 6122828    | 8125737    | 8716362    | 1675642     | 0.8488  | 0.94    |
| 7111348    | 212906     | 2655380    | 2867427    | 22601845   | 15987721   | 866731     | 2408146    | 2188701    | 6483692    | 6338390    | 7333088     | 0.8577  | 1.08    |
| 11058882   | 33591531   | 15658532   | 7908278    | 7817236    | 18221859   | 13267318   | 6157323    | 4966552    | 6506474    | 12515398   | 8603286     | 0.8636  | 1.08    |
| 11058882   | 33591531   | 15658532   | 7908278    | 7817236    | 18221859   | 13267318   | 6157323    | 4966552    | 6506474    | 12515398   | 8603286     | 0.8636  | 1.08    |
| 1972499655 | 1490937424 | 2597165948 | 3050961546 | 2033491031 | 2470602788 | 1763482400 | 2343611574 | 2075764582 | 2377308118 | 2217582506 | 446256859   | 0.8651  | 1.03    |
| 132564840  | 94494523   | 291166922  | 203562037  | 197925185  | 220224989  | 164455045  | 152714935  | 110154303  | 169312092  | 173657487  | 57725784    | 0.8656  | 1.04    |
| 113865633  | 72774489   | 121619175  | 102385309  | 57773394   | 107055590  | 61597781   | 62739586   | 59649557   | 89473141   | 84893366   | 24853723    | 0.8667  | 0.96    |
| 75626673   | 37894113   | 77294032   | 52539835   | 33992053   | 41284778   | 24084820   | 32929327   | 30149738   | 28243683   | 43403905   | 19096810    | 0.8811  | 0.96    |
| 182825413  | 359584094  | 537898649  | 264604996  | 158951030  | 286999797  | 184342887  | 311138138  | 195371424  | 285130895  | 276684732  | 112756068   | 0.8825  | 0.97    |
| 54143733   | 31255503   | 38954749   | 57640041   | 32740274   | 20013383   | 25961387   | 22527724   | 18341619   | 28118587   | 32969700   | 13578205    | 0.8829  | 1.04    |
| 423624     | 445197     | 0          | 0          | 0          | 123305722  | 93334097   | 47287809   | 30438856   | 58000638   | 35323594   | 44677989    | 0.8853  | 1.09    |
| 24401588   | 5096614    | 21097511   | 9303074    | 4205644    | 10593514   | 3389896    | 1274769    | 3433439    | 1520591    | 8431664    | 8159947     | 0.8877  | 0.95    |
| 47551326   | 9799104    | 26024117   | 28100805   | 10573187   | 48612478   | 34722161   | 29137233   | 15721421   | 23962322   | 27420415   | 13565468    | 0.8887  | 0.96    |
| 201105310  | 73460228   | 156534936  | 155220300  | 171546475  | 217673368  | 163600235  | 139568378  | 70032505   | 111855745  | 146059748  | 48958367    | 0.8894  | 0.96    |
| 194713171  | 65317106   | 180569375  | 167115876  | 195598619  | 150331338  | 138202536  | 90624683   | 34292939   | 100554475  | 131732012  | 56408867    | 0.8925  | 1.04    |
| 94179683   | 68250799   | 98351647   | 94407784   | 73385597   | 107696921  | 88020464   | 87335668   | 76391538   | 91578372   | 87959847   | 12137966    | 0.9000  | 1.04    |
| 75433764   | 12947223   | 93641412   | 27973603   | 16002150   | 14307678   | 18673436   | 24933450   | 14479154   | 12880603   | 31127247   | 28918992    | 0.9017  | 1.07    |
| 251187233  | 105702039  | 185031011  | 119924789  | 176059392  | 182638855  | 111660372  | 130370415  | 112445759  | 134422084  | 150944195  | 46638762    | 0.9012  | 1.03    |



| Accession # | Protein                                         | PEPTIDE                        | Xcorr | MZ     | % Coverage | MW [kDa] |
|-------------|-------------------------------------------------|--------------------------------|-------|--------|------------|----------|
| 6754164     | complement C5                                   | SITHDTDGVAVFVLNLP SNVTVLK      | 6.1   | 847.5  | 25.2%      | 188.8    |
| 148747546   | serine protease inhibitor A3K                   | NLINDYVSNQTQGMKK               | 3.4   | 992.0  | 82.3%      | 46.6     |
| 110347564   | ceruloplasmin b                                 | EYEGAVYPDNTTDFQR               | 4.4   | 953.4  | 29.7%      | 121.1    |
| 283483997   | maltase-glucoamylase                            | GCIWEASNTTR                    | 2.3   | 648.3  | 22.4%      | 208.4    |
| 251823841   | CD97 antigen 2                                  | DFNPATVNYTIQK                  | 2.7   | 756.4  | 13.1%      | 80.4     |
| 126723423   | macrophage colony-stimulating factor 1 receptor | THNSVGNSQYFR                   | 4.4   | 499.9  | 16.5%      | 109.1    |
| 407228385   | N-acetylmuramoyl-L-alanine amidase a            | LEPEHLQLONISQEQLAQVATLTK       | 6.3   | 935.8  | 18.3%      | 57.7     |
| 225735645   | sulfated glycoprotein 1                         | FSELIVNNAATELLVK               | 3.7   | 910.5  | 31.2%      | 61.4     |
| 261823995   | serum paraoxonase/arylesterase 1                | ITVVYAENGTVLQGTTVASVYK         | 4.7   | 1157.6 | 22.3%      | 39.5     |
| 7305235     | leukemia inhibitory factor receptor 1           | GSALPHPSNATWEIK                | 3.2   | 536.9  | 28.2%      | 122.5    |
| 115430101   | C4b-binding protein                             | ALCQKPEVGNGLSDEK               | 2.3   | 597.3  | 35.2%      | 51.5     |
| 147904569   | carboxypeptidase N                              | LSLDSNNLTALHPALFHNLRSR         | 5.8   | 584.8  | 28.3%      | 60.4     |
| 110347564   | ceruloplasmin b                                 | IYTFHAHGVITYTKEYEGAVYPDNTTDFQR | 5.1   | 857.4  | 29.7%      | 121.1    |
| 115430101   | C4b-binding protein                             | CGPPPAIPNALPASDVNRTDFESHHTLK   | 2.0   | 1003.2 | 35.2%      | 51.5     |
| 247269929   | carboxylesterase 1C                             | LVQYNISLSTMIDGVVLPK            | 2.3   | 703.1  | 48.2%      | 61.0     |
| 157951698   | complement C4-B                                 | ALNVTLSMGR                     | 2.3   | 583.3  | 27.0%      | 192.8    |
| 115430101   | C4b-binding protein                             | ALCQKPEVGNGLSDEK               | 3.6   | 616.3  | 35.2%      | 51.5     |
| 153791270   | laminin $\gamma$ 1                              | VNDNKTAEEALR                   | 2.0   | 716.9  | 7.7%       | 177.1    |
| 226958456   | histidine-rich glycoprotein                     | YSNESQDLSVNGYNCTTSSVSSALR      | 5.3   | 1371.1 | 31.9%      | 60.4     |
| 6679731     | coagulation factor V                            | LTNSPQNQNITVPR                 | 4.1   | 791.9  | 21.4%      | 247.1    |
| 6680856     | corticosteroid-binding globulin                 | VPMMVQSGNISYFR                 | 4.2   | 554.6  | 42.8%      | 44.7     |
| 8850219     | haptoglobin                                     | VVLHPNHSVVDIGLIK               | 6.8   | 436.0  | 59.9%      | 38.7     |
| 224967112   | coagulation factor XIII B chain                 | EQETCLAPELEHGNYSTQR            | 5.2   | 789.0  | 29.2%      | 76.1     |
| 7305599     | transferrin                                     | TLGISPFHEFADVVFANDSGHR         | 5.6   | 840.1  | 77.6%      | 15.8     |

| WT 1       | WT 2       | WT 3       | WT 4      | WT 5       | WT 6       | WT 7       | WT 8       | WT 9       | WT 10      | AVG_WT     | StdDev_WT  |
|------------|------------|------------|-----------|------------|------------|------------|------------|------------|------------|------------|------------|
| 407421834  | 276345267  | 133143742  | 128442    | 4693908    | 176611121  | 157761632  | 745562089  | 293481833  | 172195477  | 236734534  | 217919986  |
| 268399784  | 562653491  | 39870384   | 49168350  | 171351764  | 19173058   | 84331647   | 197893310  | 145309277  | 194043378  | 173219444  | 158935714  |
| 2496126926 | 1781817367 | 1890539929 | 650379971 | 1372915089 | 1169880754 | 2235598511 | 4613859535 | 2974500708 | 2190923991 | 2137654278 | 1100197946 |
| 725948     | 3063646    | 1532247    | 1754301   | 23858928   | 5211587    | 8877657    | 7102732    | 4852880    | 2493881    | 5947381    | 6807394    |
| 1670595    | 1439513    | 2805513    | 0         | 4142501    | 5204186    | 5650308    | 16553757   | 13034564   | 6349261    | 5685020    | 5269927    |
| 19105778   | 6939023    | 5726744    | 4125438   | 12312585   | 23897636   | 23742315   | 27220486   | 49534504   | 29927686   | 20253220   | 13895440   |
| 606754630  | 426879752  | 354911622  | 0         | 209137459  | 477299497  | 394045534  | 927718958  | 701126686  | 492551777  | 459042591  | 256214379  |
| 43060739   | 74425090   | 30014155   | 0         | 27064496   | 36950011   | 24892520   | 77896804   | 70045477   | 41347960   | 42569725   | 24885780   |
| 44380812   | 0          | 6370755    | 0         | 49854703   | 78976366   | 86633804   | 184964437  | 311609122  | 183678990  | 94646899   | 102039274  |
| 271425     | 0          | 0          | 37087     | 15235195   | 1173076    | 11783601   | 28652510   | 58540682   | 21017357   | 13671093   | 18835943   |
| 6804800    | 2543119    | 9909589    | 3502927   | 87159792   | 43945823   | 11493057   | 50251464   | 28614299   | 18253737   | 26247861   | 27102855   |
| 802561038  | 4831701    | 273965982  | 313421    | 708675768  | 865327107  | 592336901  | 1869618912 | 1333731033 | 891180998  | 734254286  | 577185097  |
| 56352580   | 4134233    | 559168     | 580981    | 940666     | 22015944   | 9874802    | 45262565   | 16606786   | 3661875    | 15998960   | 19873715   |
| 12328024   | 0          | 0          | 0         | 5369395    | 28982478   | 28847318   | 35509319   | 70451833   | 51061328   | 23254970   | 24213536   |
| 21884952   | 13664803   | 1323448    | 0         | 152410801  | 9149033    | 47913366   | 154710650  | 205526557  | 106654680  | 71323829   | 76707788   |
| 654340762  | 211015717  | 153640109  | 259510686 | 408085188  | 175140558  | 406937450  | 1255656123 | 505926780  | 693942442  | 472419581  | 334802442  |
| 45373448   | 20054060   | 18278457   | 11691755  | 148050911  | 98655474   | 63573571   | 198230833  | 107641227  | 63383041   | 77493278   | 60985166   |
| 841793675  | 922135656  | 1096456267 | 206742531 | 782140658  | 794353734  | 871264478  | 1692583142 | 870100925  | 838453743  | 891602481  | 362264695  |
| 22445451   | 0          | 0          | 4741941   | 7812493    | 8636079    | 12886049   | 51297760   | 28221307   | 14798960   | 15084004   | 15633267   |
| 52310117   | 40980445   | 39843013   | 19074068  | 44420951   | 40113391   | 57449106   | 129349276  | 63122115   | 74028603   | 56069109   | 29829436   |
| 35866566   | 5533812    | 12478973   | 2094801   | 9579617    | 44293280   | 110200944  | 124270328  | 251613025  | 178199898  | 77413124   | 85799879   |
| 1499296670 | 1147759622 | 777964295  | 683285787 | 42298937   | 106817447  | 379777824  | 8527422004 | 1699208014 | 59819959   | 1492365056 | 2541457558 |
| 137661945  | 39722578   | 28804681   | 25926846  | 54310071   | 259612528  | 211709287  | 300816012  | 205177782  | 188869288  | 145261102  | 102443265  |
| 721704696  | 373248687  | 217420657  | 0         | 607002400  | 614480592  | 461233180  | 1026825380 | 1384901378 | 836637448  | 624345442  | 400059780  |

| Null 1     | Null 2     | Null 3     | Null 4     | Null 5     | Null 6     | Null 7     | Null 8     | Null 9     | Null 10    | AVG_Null   | StdDev_Null | p value | Null/WT |
|------------|------------|------------|------------|------------|------------|------------|------------|------------|------------|------------|-------------|---------|---------|
| 436425742  | 149771915  | 336216837  | 295040062  | 472336171  | 276811514  | 192880468  | 114412701  | 58541353   | 135417605  | 246785437  | 139739109   | 0.9036  | 1.04    |
| 298146011  | 143465000  | 201385587  | 353809726  | 225799854  | 206053238  | 89827181   | 91442748   | 110905871  | 82311798   | 180314701  | 93705428    | 0.9046  | 1.04    |
| 1888175331 | 1491933146 | 2559856285 | 2969774936 | 1966109073 | 2480297120 | 1712741980 | 2287058251 | 2060335944 | 2409048800 | 2182533086 | 442099884   | 0.9061  | 1.02    |
| 8506228    | 6597434    | 6615628    | 7887333    | 3689980    | 5684570    | 3865304    | 3166349    | 6678303    | 4159852    | 5685098    | 1869520     | 0.9078  | 0.96    |
| 1847570    | 3562095    | 7859869    | 20065683   | 7951973    | 3427035    | 1029529    | 2125627    | 2828735    | 3509547    | 5420766    | 5652330     | 0.9151  | 0.95    |
| 26394521   | 22202695   | 20665033   | 23754548   | 19405563   | 28235892   | 9722072    | 20533954   | 14781289   | 21406176   | 20710174   | 5359868     | 0.9238  | 1.02    |
| 574243824  | 378119978  | 710316113  | 696345253  | 511541911  | 469122825  | 357334664  | 349731428  | 247160115  | 387123702  | 468103981  | 154080561   | 0.9247  | 1.02    |
| 43074467   | 26485852   | 45886656   | 56042466   | 47042772   | 47840395   | 45167656   | 37603369   | 26035550   | 42881755   | 41806094   | 9418124     | 0.9287  | 0.98    |
| 147245061  | 28669127   | 102434948  | 82864837   | 128038526  | 146486264  | 140331896  | 92722633   | 29776665   | 77400851   | 97597081   | 44260320    | 0.9341  | 1.03    |
| 16310634   | 1616187    | 29294787   | 20227425   | 549119     | 1311318    | 3866911    | 18762835   | 19197070   | 20192369   | 13132865   | 10309316    | 0.9377  | 0.96    |
| 41104461   | 23235426   | 49172149   | 54918475   | 38070690   | 15394295   | 18175979   | 6873581    | 9707959    | 13850104   | 27050312   | 17308479    | 0.9380  | 1.03    |
| 859905431  | 467137669  | 859991828  | 765305874  | 833807979  | 1000729120 | 715704436  | 605025612  | 491521690  | 598805955  | 719793559  | 175452364   | 0.9404  | 0.98    |
| 16054659   | 15416906   | 14228456   | 23013210   | 7790013    | 18592545   | 21377391   | 15280741   | 10061378   | 13362781   | 15517808   | 4668123     | 0.9414  | 0.97    |
| 0          | 16178766   | 17801106   | 23735438   | 13620876   | 52602664   | 34372691   | 21497451   | 25916442   | 33273257   | 23899869   | 14161481    | 0.9428  | 1.03    |
| 101792315  | 16390967   | 60518222   | 43409607   | 137619025  | 120033176  | 121235712  | 73483971   | 13445976   | 41881660   | 72981063   | 45085908    | 0.9537  | 1.02    |
| 554638251  | 248473980  | 541341577  | 310805938  | 497030580  | 345322227  | 769756821  | 175723856  | 485499911  | 723721704  | 465231485  | 195443980   | 0.9539  | 0.98    |
| 104065713  | 89451787   | 152478453  | 156727371  | 64518510   | 46049843   | 38731262   | 27448608   | 41025165   | 40158471   | 76065518   | 47862467    | 0.9542  | 0.98    |
| 450914202  | 1051359514 | 577047947  | 609581443  | 654582447  | 1340450941 | 1056922166 | 1140295264 | 1042361325 | 908818916  | 883233417  | 291996052   | 0.9553  | 0.99    |
| 22134595   | 9856925    | 6837957    | 15800079   | 12861725   | 32071031   | 12922262   | 16532111   | 11795736   | 12407054   | 15321948   | 7174210     | 0.9656  | 1.02    |
| 51950174   | 44028866   | 59102569   | 69807393   | 59213474   | 74252343   | 42232594   | 40423828   | 50291670   | 64952867   | 55625578   | 11770722    | 0.9656  | 0.99    |
| 48289778   | 76139581   | 101101644  | 88939188   | 43519764   | 84054996   | 73958782   | 88759331   | 82195415   | 99012471   | 78597095   | 19300877    | 0.9665  | 1.02    |
| 86065598   | 28600474   | 42359713   | 59059101   | 46865468   | 2149853979 | 3135275958 | 3455069253 | 3308698947 | 2849763632 | 1516161212 | 1580654866  | 0.9802  | 1.02    |
| 161856868  | 215799935  | 210215050  | 204679645  | 89144113   | 86000508   | 125690536  | 79273779   | 136218599  | 151947348  | 146082638  | 52194845    | 0.9822  | 1.01    |
| 1259441722 | 354081641  | 848579648  | 757325131  | 1078339552 | 758778852  | 332734574  | 329806154  | 220259149  | 273177436  | 621252386  | 369208869   | 0.9859  | 1.00    |

**Supplemental Table S2. ECM array for Day 0 (D0) and Day 7 (D7) post-MI for saline (Saline) or MMP-9 infarct areas from post-MI LV. Values in the numbered columns are 2-ΔCt values X 100 and are presented as mean ± SEM. 1-D0 vs D7 Saline, 2-D0 vs D7 MMP-9i, 3-D0 vs D7 Saline, 4-D0 vs D7 MMP-9i, 5-D1 Saline vs D1 MMP-9i, and 6-D7 Saline vs D7 MMP-9i**

| Gene    | D0                 | D1 Saline      | D1 Saline fold change | D1 MMP-9i      | D1 MMP-9i fold change | p value |
|---------|--------------------|----------------|-----------------------|----------------|-----------------------|---------|
| Adamts1 | 0.211 ± 0.023      | 0.603 ± 0.099  | 2.86 ± 0.47           | 1.467 ± 0.449  | 6.96 ± 2.13           | 0.0147  |
| Adamts2 | 0.148 ± 0.006      | 0.231 ± 0.019  | 1.57 ± 0.13           | 0.226 ± 0.020  | 1.53 ± 0.14           | 0.0024  |
| Adamts5 | 0.036 ± 0.004      | 0.012 ± 0.002  | 0.32 ± 0.05           | 0.015 ± 0.003  | 0.41 ± 0.08           | <0.0001 |
| Adamts8 | 0.008 ± 0.001      | 0.009 ± 0.002  | 1.18 ± 0.25           | 0.017 ± 0.008  | 2.15 ± 1.05           | 0.9721  |
| Ctnna1  | 3.444 ± 0.142      | 0.945 ± 0.102  | 0.27 ± 0.03           | 1.450 ± 0.277  | 0.42 ± 0.08           | 0.0002  |
| Ctnna2  | 0.000206 ± 0.00001 | 0.001 ± 0.0003 | 5.79 ± 1.48           | 0.001 ± 0.0003 | 3.72 ± 1.33           | 0.0092  |
| Ctnnb1  | 1.893 ± 0.039      | 0.803 ± 0.043  | 0.42 ± 0.02           | 0.749 ± 0.067  | 0.40 ± 0.04           | <0.0001 |
| Cd44    | 0.08 ± 0.004       | 0.331 ± 0.088  | 4.15 ± 1.10           | 0.343 ± 0.100  | 4.29 ± 1.25           | 0.0102  |
| Cdh1    | 0.001 ± 0.00025    | 0.006 ± 0.002  | 12.02 ± 3.42          | 0.003 ± 0.002  | 6.35 ± 3.26           | 0.0017  |
| Cdh2    | 2.573 ± 0.074      | 1.136 ± 0.209  | 0.44 ± 0.08           | 1.562 ± 0.358  | 0.61 ± 0.14           | 0.0063  |
| Cdh3    | 0.00021 ± 0.00001  | 0.001 ± 0.0003 | 5.79 ± 1.48           | 0.001 ± 0.0003 | 3.72 ± 1.33           | 0.0152  |
| Cdh4    | 0.022 ± 0.003      | 0.003 ± 0.001  | 0.15 ± 0.04           | 0.003 ± 0.0003 | 0.13 ± 0.01           | 0.0005  |
| Cntn1   | 0.0003 ± 0.0001    | 0.003 ± 0.001  | 7.91 ± 3.72           | 0.002 ± 0.001  | 6.62 ± 3.31           | 0.0607  |
| Col1a1  | 0.28 ± 0.018       | 0.316 ± 0.064  | 1.13 ± 0.23           | 0.194 ± 0.039  | 0.69 ± 0.14           | 0.1808  |
| Col2a1  | 0.0003 ± 0.0001    | 0.001 ± 0.0003 | 4.62 ± 0.93           | 0.001 ± 0.0003 | 4.54 ± 0.84           | 0.0060  |
| Col3a1  | 1.19 ± 0.087       | 0.574 ± 0.146  | 0.48 ± 0.12           | 0.771 ± 0.335  | 0.65 ± 0.28           | 0.0176  |
| Col4a1  | 1.711 ± 0.075      | 2.322 ± 0.237  | 1.36 ± 0.14           | 2.834 ± 0.420  | 1.66 ± 0.25           | 0.1010  |
| Col4a2  | 1.822 ± 0.128      | 1.868 ± 0.330  | 1.03 ± 0.18           | 2.754 ± 0.440  | 1.51 ± 0.24           | 0.1006  |
| Col4a3  | 0.011 ± 0.001      | 0.003 ± 0.001  | 0.24 ± 0.09           | 0.003 ± 0.001  | 0.22 ± 0.08           | <0.0001 |
| Col5a1  | 0.217 ± 0.006      | 0.123 ± 0.036  | 0.57 ± 0.17           | 0.105 ± 0.023  | 0.48 ± 0.11           | 0.0378  |
| Col6a1  | 0.599 ± 0.016      | 0.086 ± 0.019  | 0.14 ± 0.03           | 0.150 ± 0.029  | 0.25 ± 0.05           | 0.3900  |
| Vcan    | 0.051 ± 0.004      | 0.207 ± 0.031  | 4.02 ± 0.60           | 0.183 ± 0.019  | 3.55 ± 0.38           | 0.0002  |
| Ctgf    | 1.17 ± 0.101       | 5.977 ± 1.009  | 5.11 ± 0.86           | 7.902 ± 1.547  | 6.75 ± 1.32           | 0.0002  |
| Ecm1    | 0.453 ± 0.031      | 0.502 ± 0.082  | 1.11 ± 0.18           | 0.459 ± 0.105  | 1.01 ± 0.23           | 0.9565  |
| Emilin1 | 0.18 ± 0.005       | 0.158 ± 0.025  | 0.88 ± 0.14           | 0.164 ± 0.032  | 0.91 ± 0.18           | 0.8652  |
| Entpd1  | 0.073 ± 0.003      | 0.048 ± 0.010  | 0.67 ± 0.14           | 0.095 ± 0.020  | 1.31 ± 0.27           | 0.0545  |
| Fbln1   | 0.152 ± 0.016      | 0.012 ± 0.003  | 0.08 ± 0.02           | 0.023 ± 0.008  | 0.15 ± 0.05           | 0.0004  |
| Fn1     | 0.139 ± 0.007      | 0.499 ± 0.155  | 3.60 ± 1.12           | 0.293 ± 0.071  | 2.12 ± 0.51           | 0.2215  |
| Hapln1  | 0.0002 ± 0.00003   | 0.001 ± 0.0003 | 5.23 ± 1.17           | 0.001 ± 0.0004 | 5.13 ± 1.62           | 0.0151  |
| Hc      | 0.0002 ± 0.00004   | 0.002 ± 0.001  | 6.86 ± 2.34           | 0.001 ± 0.001  | 4.81 ± 1.83           | 0.0109  |
| Icam1   | 0.081 ± 0.007      | 0.138 ± 0.024  | 1.71 ± 0.29           | 0.098 ± 0.016  | 1.22 ± 0.20           | 0.0401  |
| Itga2   | 0.004 ± 0.001      | 0.007 ± 0.003  | 1.72 ± 0.70           | 0.005 ± 0.001  | 1.20 ± 0.32           | 0.3263  |
| Itga3   | 0.039 ± 0.001      | 0.061 ± 0.006  | 1.58 ± 0.14           | 0.057 ± 0.013  | 1.47 ± 0.33           | 0.0099  |
| Itga4   | 0.007 ± 0.001      | 0.004 ± 0.001  | 0.59 ± 0.11           | 0.003 ± 0.001  | 0.46 ± 0.18           | 0.0483  |
| Itga5   | 0.263 ± 0.011      | 0.947 ± 0.086  | 3.60 ± 0.33           | 0.803 ± 0.111  | 3.05 ± 0.42           | <0.0001 |
| Itgae   | 0.001 ± 0.0003     | 0.005 ± 0.001  | 4.17 ± 0.91           | 0.003 ± 0.001  | 2.60 ± 0.70           | 0.0155  |
| Itgal   | 0.008 ± 0.001      | 0.011 ± 0.003  | 1.36 ± 0.37           | 0.009 ± 0.003  | 1.07 ± 0.38           | 0.5583  |
| Itgam   | 0.037 ± 0.003      | 0.422 ± 0.101  | 11.34 ± 2.72          | 0.280 ± 0.043  | 7.51 ± 1.16           | 0.0002  |
| Itgav   | 0.164 ± 0.006      | 0.226 ± 0.011  | 1.38 ± 0.06           | 0.185 ± 0.017  | 1.13 ± 0.10           | 0.0048  |
| Itgax   | 0.004 ± 0.001      | 0.030 ± 0.008  | 7.06 ± 1.97           | 0.020 ± 0.010  | 4.79 ± 2.43           | 0.0002  |
| Itgb1   | 2.268 ± 0.148      | 2.945 ± 0.140  | 1.30 ± 0.06           | 2.730 ± 0.227  | 1.20 ± 0.10           | 0.4244  |
| Itgb2   | 0.048 ± 0.006      | 0.144 ± 0.038  | 2.98 ± 0.79           | 0.114 ± 0.035  | 2.35 ± 0.72           | 0.2475  |
| Itgb3   | 0.01 ± 0.001       | 0.067 ± 0.010  | 6.74 ± 1.01           | 0.069 ± 0.014  | 6.91 ± 1.43           | 0.0006  |

| Gene   | D0                | D1 Saline      | D1 Saline fold change | D1 MMP-9i      | D1 MMP-9i fold change | p value |
|--------|-------------------|----------------|-----------------------|----------------|-----------------------|---------|
| Itgb4  | 0.002 ± 0.0002    | 0.002 ± 0.0002 | 0.82 ± 0.11           | 0.001 ± 0.0003 | 0.75 ± 0.17           | 0.9458  |
| Lama1  | 0.0003 ± 0.0001   | 0.001 ± 0.0003 | 3.76 ± 0.75           | 0.001 ± 0.001  | 3.84 ± 1.97           | 0.0155  |
| Lama2  | 0.327 ± 0.012     | 0.056 ± 0.009  | 0.17 ± 0.03           | 0.086 ± 0.020  | 0.26 ± 0.06           | <0.0001 |
| Lama3  | 0.013 ± 0.001     | 0.004 ± 0.001  | 0.29 ± 0.10           | 0.008 ± 0.002  | 0.59 ± 0.15           | 0.0032  |
| Lamb2  | 1.693 ± 0.047     | 0.513 ± 0.071  | 0.30 ± 0.04           | 0.541 ± 0.052  | 0.32 ± 0.03           | <0.0001 |
| Lamb3  | 0.045 ± 0.004     | 0.014 ± 0.004  | 0.31 ± 0.09           | 0.015 ± 0.005  | 0.35 ± 0.12           | 0.0002  |
| Lamc1  | 0.748 ± 0.042     | 0.179 ± 0.035  | 0.24 ± 0.05           | 0.210 ± 0.048  | 0.28 ± 0.06           | <0.0001 |
| Mmp10  | 0.0002 ± 0.00001  | 0.001 ± 0.0003 | 7.27 ± 1.42           | 0.001 ± 0.0003 | 6.61 ± 1.59           | 0.0006  |
| Mmp11  | 0.006 ± 0.001     | 0.002 ± 0.0002 | 0.27 ± 0.04           | 0.001 ± 0.0001 | 0.23 ± 0.02           | 0.0006  |
| Mmp12  | 0.0002 ± 0.00002  | 0.001 ± 0.0004 | 6.49 ± 1.59           | 0.002 ± 0.001  | 11.07 ± 4.37          | 0.0155  |
| Mmp13  | 0.004 ± 0.001     | 0.004 ± 0.001  | 1.08 ± 0.14           | 0.002 ± 0.001  | 0.51 ± 0.17           | 0.1252  |
| Mmp14  | 0.036 ± 0.003     | 0.160 ± 0.015  | 4.49 ± 0.42           | 0.126 ± 0.015  | 3.55 ± 0.43           | <0.0001 |
| Mmp15  | 0.498 ± 0.029     | 0.072 ± 0.011  | 0.15 ± 0.02           | 0.050 ± 0.009  | 0.10 ± 0.02           | <0.0001 |
| Mmp1a  | 0.0002 ± 0.00001  | 0.001 ± 0.0003 | 5.79 ± 1.48           | 0.002 ± 0.001  | 8.11 ± 5.30           | 0.0185  |
| Mmp2   | 0.448 ± 0.023     | 0.049 ± 0.005  | 0.11 ± 0.01           | 0.192 ± 0.061  | 0.43 ± 0.14           | 0.0002  |
| Mmp3   | 0.014 ± 0.003     | 0.126 ± 0.021  | 8.70 ± 1.43           | 0.183 ± 0.025  | 12.66 ± 1.76          | 0.0001  |
| Mmp7   | 0.0002 ± 0.00001  | 0.001 ± 0.0003 | 6.11 ± 1.33           | 0.001 ± 0.0003 | 3.72 ± 1.33           | 0.0092  |
| Mmp8   | 0.002 ± 0.001     | 0.050 ± 0.012  | 42.99 ± 10.53         | 0.050 ± 0.016  | 43.10 ± 13.76         | 0.0011  |
| Mmp9   | 0.002 ± 0.0003    | 0.033 ± 0.001  | 20.29 ± 7.26          | 0.029 ± 0.001  | 17.69 ± 5.16          | 0.0005  |
| Ncam1  | 0.013 ± 0.001     | 0.022 ± 0.004  | 1.67 ± 0.31           | 0.015 ± 0.003  | 1.11 ± 0.26           | 0.0845  |
| Ncam2  | 0.0002 ± 0.000008 | 0.001 ± 0.0001 | 5.47 ± 1.39           | 0.001 ± 0.0003 | 3.50 ± 1.25           | 0.0179  |
| Pecam1 | 0.735 ± 0.155     | 0.676 ± 0.027  | 0.92 ± 0.04           | 0.606 ± 0.034  | 0.82 ± 0.05           | 0.0611  |
| Postn  | 0.071 ± 0.007     | 0.064 ± 0.009  | 0.89 ± 0.12           | 0.071 ± 0.011  | 0.99 ± 0.16           | 0.9617  |
| Sele   | 0.011 ± 0.001     | 0.055 ± 0.012  | 4.87 ± 1.03           | 0.046 ± 0.009  | 4.02 ± 0.78           | 0.0005  |
| Sell   | 0.006 ± 0.001     | 0.072 ± 0.024  | 11.13 ± 3.72          | 0.045 ± 0.012  | 6.91 ± 1.82           | 0.0002  |
| Selp   | 0.004 ± 0.0004    | 0.393 ± 0.149  | 103.01 ± 39.15        | 0.187 ± 0.041  | 49.07 ± 10.63         | 0.0003  |
| Sgce   | 0.09 ± 0.007      | 0.020 ± 0.004  | 0.23 ± 0.05           | 0.032 ± 0.004  | 0.36 ± 0.04           | <0.0001 |
| Sparc  | 2.013 ± 0.11      | 1.077 ± 0.203  | 0.53 ± 0.10           | 1.053 ± 0.180  | 0.52 ± 0.09           | 0.0057  |
| Spock1 | 0.0002 ± 0.00001  | 0.001 ± 0.0002 | 7.08 ± 1.08           | 0.002 ± 0.001  | 8.85 ± 5.98           | 0.0152  |
| Spp1   | 0.003 ± 0.002     | 0.657 ± 0.212  | 189.68 ± 61.2         | 0.564 ± 0.344  | 162.9 ± 99.5          | 0.0011  |
| Syt1   | 0.0002 ± 0.00001  | 0.002 ± 0.0003 | 8.48 ± 1.64           | 0.001 ± 0.0003 | 3.72 ± 1.33           | 0.0070  |
| Tgfbi  | 0.36 ± 0.034      | 1.139 ± 0.378  | 3.16 ± 1.05           | 0.827 ± 0.365  | 2.30 ± 1.01           | 0.6522  |
| Thbs1  | 0.088 ± 0.02      | 1.486 ± 0.205  | 16.98 ± 2.34          | 1.234 ± 0.227  | 14.10 ± 2.59          | 0.0003  |
| Thbs2  | 0.159 ± 0.01      | 0.040 ± 0.004  | 0.25 ± 0.03           | 0.054 ± 0.013  | 0.34 ± 0.08           | <0.0001 |
| Thbs3  | 0.034 ± 0.003     | 0.013 ± 0.003  | 0.38 ± 0.08           | 0.017 ± 0.004  | 0.50 ± 0.12           | 0.0102  |
| Timp1  | 0.0002 ± 0.00003  | 0.001 ± 0.0003 | 5.22 ± 1.33           | 0.001 ± 0.0003 | 3.41 ± 1.17           | 0.0099  |
| Timp2  | 0.588 ± 0.034     | 0.135 ± 0.016  | 0.23 ± 0.03           | 0.185 ± 0.034  | 0.31 ± 0.06           | 0.6046  |
| Timp3  | 0.289 ± 0.038     | 0.251 ± 0.035  | 0.87 ± 0.12           | 0.499 ± 0.156  | 1.73 ± 0.54           | 0.1903  |
| Tnc    | 0.006 ± 0.002     | 0.401 ± 0.085  | 69.20 ± 14.71         | 0.208 ± 0.044  | 35.83 ± 7.65          | 0.0001  |
| Vcam1  | 0.09 ± 0.01       | 0.026 ± 0.008  | 0.29 ± 0.09           | 0.063 ± 0.019  | 0.70 ± 0.21           | 0.0032  |
| Vtn    | 0.371 ± 0.02      | 0.043 ± 0.014  | 0.12 ± 0.04           | 0.052 ± 0.007  | 0.14 ± 0.02           | <0.0001 |

MMP-9 inhibitor (MMP-9i) treated mice. Samples are left ventricles (LVs) from no MI (D0) or 7 days post-MI (D7) as mean±SEM for n=6/group. For the post-test column, 1-D0 vs D1 saline, 2-D0 vs D7 saline, 3-D0 vs D7 MMP-9i, 4-D1 vs D7 saline, 5-D1 vs D7 MMP-9i, 6-D0 vs D7 MMP-9i.

| D7 Saline        | D7 Saline fold change | D7 MMP-9i        | D7 MMP-9i fold change | p value | post-test |
|------------------|-----------------------|------------------|-----------------------|---------|-----------|
| 0.157 ± 0.04     | 0.74 ± 0.19           | 0.378 ± 0.069    | 1.79 ± 0.33           | 0.0144  | 2,4,6     |
| 1.357 ± 0.24     | 9.19 ± 1.63           | 1.974 ± 0.249    | 13.37 ± 1.69          | <0.0001 | 1,2,4     |
| 0.033 ± 0.008    | 0.93 ± 0.23           | 0.048 ± 0.004    | 1.33 ± 0.10           | 0.1881  | 1,2       |
| 0.016 ± 0.005    | 2.08 ± 0.68           | 0.024 ± 0.005    | 3.01 ± 0.66           | 0.1562  |           |
| 1.084 ± 0.228    | 0.31 ± 0.07           | 1.635 ± 0.159    | 0.47 ± 0.05           | <0.0001 | 1,2,3,4,6 |
| 0.001 ± 0.0001   | 2.51 ± 0.49           | 0.0004 ± 0.0001  | 1.86 ± 0.31           | 0.0025  | 1,3       |
| 0.986 ± 0.169    | 0.52 ± 0.09           | 1.648 ± 0.102    | 0.87 ± 0.05           | 0.0009  | 1,2,3     |
| 0.281 ± 0.062    | 3.52 ± 0.78           | 0.457 ± 0.068    | 5.71 ± 0.86           | <0.0001 | 2,4       |
| 0.002 ± 0.0003   | 4.19 ± 0.59           | 0.005 ± 0.001    | 8.73 ± 2.77           | 0.0028  | 1,4       |
| 1.005 ± 0.176    | 0.39 ± 0.07           | 1.548 ± 0.196    | 0.60 ± 0.08           | <0.0001 | 1,3,4,6   |
| 0.001 ± 0.0001   | 4.89 ± 0.73           | 0.002 ± 0.0005   | 10.71 ± 2.40          | <0.0001 | 1,4       |
| 0.001 ± 0.0005   | 0.06 ± 0.02           | 0.003 ± 0.001    | 0.13 ± 0.05           | 0.0002  | 1,2,3,4   |
| 0.001 ± 0.0002   | 1.96 ± 0.63           | 0.0003 ± 0.00005 | 1.01 ± 0.15           | 0.1294  |           |
| 15.754 ± 3.705   | 56.17 ± 13.21         | 21.208 ± 2.429   | 75.62 ± 8.66          | 0.0001  | 3,4       |
| 0.033 ± 0.017    | 100.3 ± 51.85         | 0.066 ± 0.036    | 203.2 ± 111.4         | 0.0002  | 1,2,3,4   |
| 13.233 ± 3.484   | 11.12 ± 2.93          | 35.1 ± 7.989     | 29.51 ± 6.72          | <0.0001 | 1,4,6     |
| 2.393 ± 0.811    | 1.40 ± 0.47           | 4.421 ± 0.653    | 2.58 ± 0.38           | 0.0164  | 4,6       |
| 2.782 ± 0.782    | 1.53 ± 0.43           | 4.237 ± 0.467    | 2.32 ± 0.26           | 0.0188  | 4         |
| 0.006 ± 0.002    | 0.53 ± 0.19           | 0.006 ± 0.001    | 0.56 ± 0.10           | 0.0602  | 1,2       |
| 0.947 ± 0.265    | 4.37 ± 1.22           | 2.251 ± 0.376    | 10.39 ± 1.73          | 0.0003  | 2,4,6     |
| 1.829 ± 0.706    | 3.05 ± 1.18           | 1.932 ± 0.406    | 3.23 ± 0.68           | 0.1168  | 1,2,5     |
| 0.224 ± 0.025    | 4.35 ± 0.49           | 0.323 ± 0.021    | 6.27 ± 0.41           | <0.0001 | 1,2,4     |
| 8.243 ± 1.745    | 7.04 ± 1.49           | 15.084 ± 1.765   | 12.89 ± 1.51          | <0.0001 | 1,2,4     |
| 0.73 ± 0.232     | 1.61 ± 0.51           | 1.643 ± 0.229    | 3.63 ± 0.51           | 0.0079  | 4         |
| 0.607 ± 0.112    | 3.37 ± 0.62           | 0.959 ± 0.146    | 5.32 ± 0.81           | <0.0001 | 4         |
| 0.053 ± 0.017    | 0.73 ± 0.24           | 0.087 ± 0.018    | 1.20 ± 0.25           | 0.3666  |           |
| 0.168 ± 0.079    | 1.11 ± 0.52           | 0.175 ± 0.056    | 1.16 ± 0.37           | 0.7831  | 1,2       |
| 3.276 ± 0.414    | 23.64 ± 2.99          | 7.663 ± 1.206    | 55.29 ± 8.71          | <0.0001 | 4         |
| 0.001 ± 0.0001   | 2.30 ± 0.39           | 0.001 ± 0.0003   | 2.96 ± 1.05           | 0.0125  | 1,3,4     |
| 0.0005 ± 0.00015 | 1.72 ± 0.42           | 0.001 ± 0.0003   | 3.88 ± 1.04           | 0.0211  | 1,4       |
| 0.059 ± 0.016    | 0.74 ± 0.20           | 0.135 ± 0.011    | 1.67 ± 0.14           | 0.0014  | 1,4,6     |
| 0.008 ± 0.002    | 1.97 ± 0.37           | 0.017 ± 0.002    | 4.15 ± 0.54           | <0.0001 | 4         |
| 0.015 ± 0.005    | 0.39 ± 0.13           | 0.027 ± 0.005    | 0.70 ± 0.13           | 0.0061  | 1,3       |
| 0.019 ± 0.006    | 2.66 ± 0.85           | 0.027 ± 0.005    | 3.77 ± 0.71           | 0.2250  | 2,4       |
| 0.216 ± 0.033    | 0.82 ± 0.13           | 0.485 ± 0.056    | 1.85 ± 0.21           | 0.0003  | 1,4,6     |
| 0.009 ± 0.002    | 7.37 ± 1.45           | 0.008 ± 0.001    | 3.45 ± 1.08           | 0.0005  | 1,3,4     |
| 0.013 ± 0.004    | 1.61 ± 0.55           | 0.015 ± 0.002    | 1.86 ± 0.20           | 0.1054  |           |
| 0.167 ± 0.024    | 4.47 ± 0.65           | 0.314 ± 0.052    | 8.44 ± 1.39           | <0.0001 | 1,2,4     |
| 0.647 ± 0.049    | 3.94 ± 0.30           | 0.591 ± 0.046    | 3.60 ± 0.28           | 0.0003  | 1,3,4,5   |
| 0.052 ± 0.01     | 12.16 ± 2.25          | 0.05 ± 0.009     | 11.80 ± 2.04          | 0.0006  | 1,2,3,4   |
| 2.654 ± 0.311    | 1.17 ± 0.14           | 3.912 ± 0.288    | 1.73 ± 0.13           | 0.0011  | 1,4,6     |
| 0.138 ± 0.028    | 2.84 ± 0.58           | 0.346 ± 0.063    | 7.14 ± 1.30           | 0.0009  | 4         |
| 0.027 ± 0.007    | 2.72 ± 0.68           | 0.067 ± 0.006    | 6.70 ± 0.63           | <0.0001 | 1,2,4     |

| D7 Saline       | D7 Saline fold change | D7 MMP-9i        | D7 MMP-9i fold change | p value | post-test |
|-----------------|-----------------------|------------------|-----------------------|---------|-----------|
| 0.001 ± 0.0004  | 0.75 ± 0.23           | 0.002 ± 0.0003   | 1.17 ± 0.16           | 0.2500  |           |
| 0.001 ± 0.0003  | 2.67 ± 0.78           | 0.004 ± 0.001    | 10.22 ± 2.53          | 0.0002  | 1,4       |
| 0.189 ± 0.071   | 0.58 ± 0.22           | 0.338 ± 0.069    | 1.03 ± 0.21           | 0.1735  | 1,2       |
| 0.007 ± 0.003   | 0.52 ± 0.19           | 0.008 ± 0.002    | 0.59 ± 0.17           | 0.0914  | 1,2       |
| 0.653 ± 0.225   | 0.39 ± 0.13           | 0.86 ± 0.114     | 0.51 ± 0.07           | 0.0050  | 1,2,3     |
| 0.005 ± 0.002   | 0.11 ± 0.05           | 0.004 ± 0.001    | 0.09 ± 0.02           | 0.0004  | 1,2,3,4   |
| 0.273 ± 0.135   | 0.37 ± 0.18           | 0.652 ± 0.17     | 0.87 ± 0.23           | 0.0443  | 1,2       |
| 0.0005 ± 0.0001 | 2.43 ± 0.58           | 0.0005 ± 0.0002  | 2.26 ± 0.61           | 0.0299  | 1,2       |
| 0.008 ± 0.002   | 1.34 ± 0.28           | 0.014 ± 0.003    | 2.27 ± 0.49           | 0.0435  | 1,2       |
| 0.001 ± 0.0002  | 3.26 ± 0.99           | 0.002 ± 0.001    | 8.41 ± 2.39           | 0.0198  | 1,4       |
| 0.004 ± 0.001   | 1.05 ± 0.15           | 0.006 ± 0.001    | 1.47 ± 0.26           | 0.3351  |           |
| 0.446 ± 0.055   | 12.54 ± 1.54          | 0.69 ± 0.071     | 19.40 ± 2.00          | <0.0001 | 1,4       |
| 0.066 ± 0.037   | 0.13 ± 0.07           | 0.08 ± 0.025     | 0.16 ± 0.05           | <0.0001 | 1,2,3,4   |
| 0.0004 ± 0.0001 | 2.04 ± 0.59           | 0.0004 ± 0.0001  | 1.93 ± 0.34           | 0.0483  | 1         |
| 0.917 ± 0.382   | 2.04 ± 0.85           | 1.33 ± 0.331     | 2.97 ± 0.74           | 0.2706  | 1,2       |
| 0.015 ± 0.003   | 1.04 ± 0.17           | 0.052 ± 0.031    | 3.58 ± 2.17           | 0.2846  | 1,2       |
| 0.0004 ± 0.0001 | 2.04 ± 0.59           | 0.001 ± 0.0002   | 2.47 ± 0.75           | 0.0506  | 1         |
| 0.002 ± 0.001   | 1.88 ± 0.63           | 0.014 ± 0.004    | 11.71 ± 3.54          | <0.0001 | 1,2,4     |
| 0.007 ± 0.0001  | 4.36 ± 2.56           | 0.001 ± 0.0001   | 23.93 ± 13.97         | 0.0685  | 1,2       |
| 0.089 ± 0.016   | 6.73 ± 1.21           | 0.112 ± 0.024    | 8.50 ± 1.82           | 0.0003  | 3,4       |
| 0.001 ± 0.0002  | 2.52 ± 0.77           | 0.001 ± 0.0003   | 3.03 ± 1.41           | 0.1482  | 1         |
| 0.245 ± 0.084   | 0.33 ± 0.11           | 0.493 ± 0.073    | 0.67 ± 0.10           | 0.0221  | 3         |
| 3.41 ± 0.839    | 47.77 ± 11.75         | 7.641 ± 2.293    | 107.0 ± 32.12         | 0.0001  | 3,4       |
| 0.005 ± 0.002   | 0.44 ± 0.17           | 0.009 ± 0.002    | 0.79 ± 0.15           | 0.0366  | 1,2,3     |
| 0.015 ± 0.003   | 2.25 ± 0.51           | 0.02 ± 0.002     | 3.04 ± 0.35           | 0.0033  | 1,2,4     |
| 0.013 ± 0.005   | 3.52 ± 1.20           | 0.023 ± 0.002    | 6.10 ± 0.46           | 0.0077  | 1,2,4     |
| 0.063 ± 0.019   | 0.71 ± 0.21           | 0.114 ± 0.017    | 1.26 ± 0.19           | 0.1034  | 1,2       |
| 6.725 ± 0.86    | 3.34 ± 0.43           | 15.638 ± 2.155   | 7.77 ± 1.07           | <0.0001 | 1,2,4     |
| 0.0004 ± 0.0001 | 2.04 ± 0.59           | 0.0005 ± 0.0001  | 2.41 ± 0.48           | 0.1796  | 1         |
| 0.864 ± 0.349   | 249.4 ± 100.9         | 3.949 ± 0.999    | 1140.4 ± 288.6        | <0.0001 | 1,2,4     |
| 0.0004 ± 0.0001 | 2.04 ± 0.59           | 0.0003 ± 0.00005 | 1.57 ± 0.24           | 0.5236  | 1         |
| 0.465 ± 0.116   | 1.29 ± 0.32           | 1.455 ± 0.274    | 4.04 ± 0.76           | <0.0001 | 4         |
| 5.099 ± 1.148   | 58.27 ± 13.12         | 7.129 ± 1.324    | 81.48 ± 15.13         | 0.0002  | 1,2,3,4   |
| 1.039 ± 0.218   | 6.52 ± 1.37           | 1.902 ± 0.426    | 11.93 ± 2.67          | 0.0001  | 1,2,3,4   |
| 0.113 ± 0.032   | 3.34 ± 0.94           | 0.134 ± 0.018    | 3.99 ± 0.54           | 0.0003  | 1,2,3,4   |
| 0.001 ± 0.0002  | 4.96 ± 0.85           | 0.001 ± 0.0003   | 5.19 ± 1.18           | 0.0318  | 1,3,4     |
| 1.94 ± 0.238    | 3.30 ± 0.41           | 1.979 ± 0.195    | 3.36 ± 0.33           | 0.0006  | 1,2,3,4   |
| 0.438 ± 0.081   | 1.52 ± 0.28           | 0.451 ± 0.071    | 1.56 ± 0.25           | 0.0176  | 3,4       |
| 0.289 ± 0.069   | 49.89 ± 11.88         | 0.741 ± 0.066    | 127.8 ± 11.46         | <0.0001 | 1,2,4     |
| 0.168 ± 0.04    | 1.85 ± 0.44           | 0.298 ± 0.051    | 3.29 ± 0.56           | 0.0014  | 1,4       |
| 0.083 ± 0.045   | 0.22 ± 0.12           | 0.105 ± 0.028    | 0.28 ± 0.08           | 0.0003  | 1,2,3,4   |

**Supplemental Table S3. Inflammatory array for Day 0 (D0) and Day 7 (D7) post-MI LV for saline (S from no MI (D0) or infarct areas from post-MI LV. Values in the numbered columns are 2-ΔCt value column, 1-D0 vs D1 Saline, 2-D0 vs D1 MMP-9i, 3-D0 vs D7 Saline, 4-D0 vs D7 MMP-9i, 5-D1 Saline**

| Gene   | 1. D0           | 2. D1 Saline   | D1 Saline fold change | 3. D1 MMP-9i   | D1 MMP-9i fold change | p value |
|--------|-----------------|----------------|-----------------------|----------------|-----------------------|---------|
| Abcf1  | 0.809 ± 0.025   | 0.0496 ± 0.068 | 1.23 ± 0.17           | 0.522 ± 0.080  | 1.30 ± 0.2            | <0.0001 |
| Bcl6   | 0.166 ± 0.019   | 0.094 ± 0.016  | 1.24 ± 0.21           | 0.066 ± 0.004  | 0.86 ± 0.05           | 0.0044  |
| Cxcr5  | 0.003 ± 0.001   | 0.003 ± 0.001  | 1.39 ± 0.32           | 0.002 ± 0.0004 | 0.79 ± 0.17           | 0.0664  |
| C3     | 0.926 ± 0.174   | 0.216 ± 0.024  | 1.23 ± 0.14           | 0.175 ± 0.035  | 1.00 ± 0.20           | 0.0019  |
| Casp1  | 0.055 ± 0.007   | 0.048 ± 0.009  | 1.31 ± 0.24           | 0.038 ± 0.007  | 1.02 ± 0.18           | 0.5111  |
| Ccl1   | 0.0005 ± 0.0001 | 0.001 ± 0.0002 | 1.41 ± 0.35           | 0.001 ± 0.0003 | 1.47 ± 0.46           | 0.1790  |
| Ccl11  | 0.014 ± 0.004   | 0.007 ± 0.002  | 1.21 ± 0.28           | 0.011 ± 0.003  | 1.86 ± 0.53           | 0.0004  |
| Ccl12  | 0.041 ± 0.01    | 0.058 ± 0.020  | 0.92 ± 0.31           | 0.054 ± 0.010  | 0.85 ± 0.16           | 0.8981  |
| Ccl17  | 0.001 ± 0.0002  | 0.012 ± 0.005  | 0.83 ± 0.36           | 0.006 ± 0.001  | 0.40 ± 0.05           | 0.0411  |
| Ccl19  | 0.119 ± 0.018   | 0.061 ± 0.015  | 1.37 ± 0.35           | 0.222 ± 0.078  | 4.96 ± 1.74           | 0.0817  |
| Ccl2   | 0.10 ± 0.017    | 0.809 ± 0.180  | 1.03 ± 0.23           | 0.641 ± 0.084  | 0.82 ± 0.11           | 0.0009  |
| Ccl20  | 0.0004 ± 0.0001 | 0.001 ± 0.0005 | 1.13 ± 0.42           | 0.001 ± 0.0003 | 0.80 ± 0.25           | 0.1001  |
| Ccl22  | 0.001 ± 0.001   | 0.002 ± 0.001  | 0.99 ± 0.39           | 0.001 ± 0.0003 | 0.65 ± 0.13           | 0.5671  |
| Ccl24  | 0.004 ± 0.0003  | 0.003 ± 0.001  | 0.54 ± 0.56           | 0.003 ± 0.001  | 1.74 ± 0.80           | 0.9395  |
| Ccl25  | 0.004 ± 0.001   | 0.002 ± 0.001  | 0.96 ± 0.40           | 0.006 ± 0.002  | 2.46 ± 0.60           | 0.0020  |
| Ccl3   | 0.002 ± 0.001   | 0.019 ± 0.005  | 0.97 ± 0.23           | 0.016 ± 0.004  | 0.79 ± 0.23           | 0.0090  |
| Ccl4   | 0.005 ± 0.001   | 0.092 ± 0.029  | 1.04 ± 0.33           | 0.050 ± 0.012  | 0.57 ± 0.13           | 0.0138  |
| Ccl5   | 0.024 ± 0.008   | 0.010 ± 0.001  | 1.06 ± 0.10           | 0.014 ± 0.005  | 1.50 ± 0.52           | 0.7975  |
| Ccl6   | 0.025 ± 0.006   | 0.084 ± 0.026  | 0.94 ± 0.30           | 0.085 ± 0.024  | 0.95 ± 0.27           | 0.0700  |
| Ccl7   | 0.074 ± 0.014   | 0.412 ± 0.122  | 0.92 ± 0.27           | 0.325 ± 0.068  | 0.73 ± 0.15           | 0.0186  |
| Ccl8   | 0.035 ± 0.01    | 0.004 ± 0.001  | 1.22 ± 0.19           | 0.007 ± 0.003  | 2.10 ± 0.74           | 0.0384  |
| Ccl9   | 0.034 ± 0.002   | 0.117 ± 0.018  | 1.11 ± 0.17           | 0.101 ± 0.019  | 0.95 ± 0.18           | 0.0014  |
| Ccr1   | 0.022 ± 0.004   | 0.132 ± 0.035  | 0.94 ± 0.25           | 0.094 ± 0.016  | 0.67 ± 0.12           | 0.0004  |
| Ccr2   | 0.015 ± 0.005   | 0.078 ± 0.031  | 0.95 ± 0.37           | 0.041 ± 0.017  | 0.51 ± 0.21           | 0.1150  |
| Ccr3   | 0.01 ± 0.001    | 0.021 ± 0.008  | 0.88 ± 0.34           | 0.023 ± 0.011  | 0.95 ± 0.45           | 0.3016  |
| Ccr4   | 0.001 ± 0.0002  | 0.001 ± 0.0002 | 1.42 ± 0.37           | 0.002 ± 0.0004 | 2.5 ± 0.70            | 0.0901  |
| Ccr5   | 0.035 ± 0.005   | 0.032 ± 0.009  | 1.00 ± 0.39           | 0.034 ± 0.011  | 1.07 ± 0.36           | 0.8496  |
| Ccr6   | 0.002 ± 0.001   | 0.002 ± 0.001  | 1.95 ± 0.93           | 0.001 ± 0.0003 | 1.24 ± 0.31           | 0.9809  |
| Ccr7   | 0.003 ± 0.001   | 0.009 ± 0.003  | 1.18 ± 0.37           | 0.003 ± 0.001  | 0.38 ± 0.13           | 0.0838  |
| Ccr8   | 0.0003 ± 0.0001 | 0.002 ± 0.001  | 1.51 ± 0.64           | 0.001 ± 0.0003 | 0.92 ± 0.24           | 0.0138  |
| Ccr9   | 0.015 ± 0.003   | 0.004 ± 0.001  | 1.06 ± 0.30           | 0.007 ± 0.002  | 1.97 ± 0.41           | 0.1287  |
| Crp    | 0.0004 ± 0.0001 | 0.001 ± 0.0002 | 1.40 ± 0.35           | 0.001 ± 0.0003 | 1.59 ± 0.40           | 0.5125  |
| Cx3cl1 | 0.117 ± 0.008   | 0.045 ± 0.009  | 1.08 ± 0.22           | 0.052 ± 0.010  | 1.25 ± 0.24           | 0.5596  |
| Cxcl1  | 0.009 ± 0.003   | 0.039 ± 0.009  | 1.21 ± 0.28           | 0.058 ± 0.009  | 1.80 ± 0.28           | 0.0030  |
| Cxcl10 | 0.011 ± 0.004   | 0.031 ± 0.007  | 0.99 ± 0.22           | 0.015 ± 0.003  | 0.46 ± 0.10           | 0.0119  |
| Cxcl11 | 0.002 ± 0.001   | 0.003 ± 0.002  | 0.96 ± 0.48           | 0.001 ± 0.0002 | 0.38 ± 0.06           | 0.0259  |
| Cxcl12 | 1.239 ± 0.045   | 0.687 ± 0.152  | 1.38 ± 0.31           | 0.867 ± 0.088  | 1.74 ± 0.18           | 0.5118  |
| Cxcl13 | 0.004 ± 0.002   | 0.004 ± 0.002  | 0.88 ± 0.45           | 0.004 ± 0.002  | 0.91 ± 0.43           | 0.5423  |
| Cxcl15 | 0.0005 ± 0.0001 | 0.001 ± 0.001  | 1.30 ± 0.47           | 0.001 ± 0.0003 | 0.95 ± 0.25           | 0.6828  |
| Pf4    | 0.102 ± 0.013   | 0.259 ± 0.057  | 1.03 ± 0.23           | 0.174 ± 0.033  | 0.69 ± 0.13           | 0.4317  |
| Cxcl5  | 0.003 ± 0.001   | 0.197 ± 0.033  | 0.98 ± 0.16           | 0.156 ± 0.042  | 0.78 ± 0.21           | 0.0003  |
| Cxcl9  | 0.045 ± 0.009   | 0.007 ± 0.001  | 1.05 ± 0.20           | 0.011 ± 0.003  | 1.81 ± 0.41           | <0.0001 |
| Cxcr3  | 0.001 ± 0.0004  | 0.002 ± 0.001  | 1.03 ± 0.29           | 0.001 ± 0.0003 | 0.67 ± 0.17           | 0.7930  |



|          |                 |                |              |                |             |         |
|----------|-----------------|----------------|--------------|----------------|-------------|---------|
| Ccr10    | 0.024 ± 0.002   | 0.005 ± 0.002  | 1.70 ± 0.61  | 0.003 ± 0.001  | 1.05 ± 0.37 | 0.0003  |
| Ifng     | 0.001 ± 0.0003  | 0.001 ± 0.0002 | 1.42 ± 0.37  | 0.001 ± 0.0003 | 1.70 ± 0.44 | 0.9130  |
| Il10     | 0.001 ± 0.0003  | 0.012 ± 0.004  | 0.97 ± 0.30  | 0.008 ± 0.003  | 0.67 ± 0.20 | 0.0039  |
| Il10ra   | 0.02 ± 0.002    | 0.022 ± 0.006  | 0.97 ± 0.27  | 0.009 ± 0.003  | 0.42 ± 0.12 | 0.1065  |
| Il10rb   | 1.16 ± 0.042    | 0.269 ± 0.034  | 1.28 ± 0.16  | 0.303 ± 0.050  | 1.44 ± 0.24 | 0.0136  |
| Il11     | 0.001 ± 0.0002  | 0.018 ± 0.011  | 0.86 ± 0.52  | 0.010 ± 0.002  | 0.48 ± 0.10 | 0.0004  |
| Il13     | 0.001 ± 0.0003  | 0.001 ± 0.0005 | 1.12 ± 0.42  | 0.001 ± 0.0002 | 0.98 ± 0.19 | 0.0590  |
| Il13ra1  | 0.218 ± 0.016   | 0.219 ± 0.026  | 1.07 ± 0.13  | 0.214 ± 0.035  | 1.05 ± 0.17 | 0.4246  |
| Il15     | 0.363 ± 0.012   | 0.078 ± 0.018  | 1.52 ± 0.35  | 0.083 ± 0.012  | 1.63 ± 0.24 | <0.0001 |
| Il16     | 0.026 ± 0.002   | 0.016 ± 0.002  | 1.16 ± 0.11  | 0.008 ± 0.001  | 0.61 ± 0.09 | <0.0001 |
| Il17b    | 0.0005 ± 0.0002 | 0.002 ± 0.001  | 1.05 ± 0.36  | 0.001 ± 0.0003 | 0.63 ± 0.18 | 0.0626  |
| Il18     | 0.009 ± 0.002   | 0.009 ± 0.001  | 1.22 ± 0.21  | 0.007 ± 0.002  | 0.93 ± 0.29 | 0.1235  |
| Il1a     | 0.002 ± 0.0004  | 0.005 ± 0.002  | 0.96 ± 0.32  | 0.003 ± 0.001  | 0.65 ± 0.17 | 0.1275  |
| Il1b     | 0.018 ± 0.006   | 0.122 ± 0.056  | 0.88 ± 0.41  | 0.132 ± 0.037  | 0.95 ± 0.27 | 0.0018  |
| Il1f6    | 0.0004 ± 0.0001 | 0.001 ± 0.0004 | 1.17 ± 0.39  | 0.001 ± 0.0003 | 0.90 ± 0.28 | 0.0158  |
| Il1f8    | 0.001 ± 0.0003  | 0.003 ± 0.002  | 0.88 ± 0.63  | 0.001 ± 0.0002 | 0.33 ± 0.07 | 0.0177  |
| Il1r1    | 0.10 ± 0.007    | 0.152 ± 0.021  | 1.26 ± 0.17  | 0.154 ± 0.013  | 1.29 ± 0.11 | 0.0005  |
| Il1r2    | 0.005 ± 0.002   | 0.385 ± 0.116  | 0.94 ± 0.28  | 0.228 ± 0.040  | 0.56 ± 0.10 | 0.0004  |
| Il20     | 0.001 ± 0.0002  | 0.001 ± 0.0001 | 1.13 ± 0.77  | 0.001 ± 0.0001 | 0.43 ± 0.12 | 0.0317  |
| Il2rb    | 0.002 ± 0.001   | 0.001 ± 0.0004 | 1.39 ± 0.38  | 0.001 ± 0.0003 | 1.34 ± 0.28 | 0.2991  |
| Il2rg    | 0.07 ± 0.006    | 0.045 ± 0.014  | 0.973 ± 0.31 | 0.028 ± 0.003  | 0.61 ± 0.08 | 0.0071  |
| Il3      | 0.0005 ± 0.0002 | 0.001 ± 0.0003 | 1.28 ± 0.34  | 0.002 ± 0.0004 | 1.94 ± 0.55 | 0.0151  |
| Il4      | 0.001 ± 0.0003  | 0.002 ± 0.001  | 1.00 ± 0.47  | 0.001 ± 0.0003 | 0.61 ± 0.15 | 0.1078  |
| Il5ra    | 0.001 ± 0.0002  | 0.002 ± 0.001  | 0.96 ± 0.55  | 0.001 ± 0.0003 | 0.51 ± 0.13 | 0.3013  |
| Il6ra    | 0.052 ± 0.005   | 0.064 ± 0.008  | 1.08 ± 0.14  | 0.066 ± 0.007  | 1.11 ± 0.12 | 0.2267  |
| Il6st    | 0.791 ± 0.164   | 0.464 ± 0.084  | 1.03 ± 0.19  | 0.486 ± 0.066  | 1.08 ± 0.15 | <0.0001 |
| Il8rb    | 0.007 ± 0.003   | 0.063 ± 0.023  | 0.96 ± 0.35  | 0.030 ± 0.008  | 0.46 ± 0.12 | 0.0003  |
| Itgam    | 0.06 ± 0.008    | 0.485 ± 0.125  | 1.02 ± 0.26  | 0.290 ± 0.051  | 0.61 ± 0.11 | 0.0002  |
| Itgb2    | 0.044 ± 0.007   | 0.116 ± 0.032  | 0.98 ± 0.27  | 0.073 ± 0.019  | 0.62 ± 0.16 | 0.1063  |
| Lta      | 0.0003 ± 0.0001 | 0.002 ± 0.001  | 1.05 ± 0.38  | 0.001 ± 0.0003 | 0.66 ± 0.19 | 0.0130  |
| Ltb      | 0.003 ± 0.001   | 0.010 ± 0.003  | 1.02 ± 0.35  | 0.006 ± 0.003  | 0.64 ± 0.28 | 0.5663  |
| Mif      | 1.135 ± 0.114   | 1.260 ± 0.261  | 1.02 ± 0.21  | 1.007 ± 0.106  | 0.82 ± 0.09 | 0.0002  |
| Scye1    | 0.786 ± 0.047   | 0.359 ± 0.053  | 1.08 ± 0.16  | 0.392 ± 0.050  | 1.18 ± 0.15 | <0.0001 |
| Spp1     | 0.019 ± 0.007   | 0.646 ± 0.210  | 1.05 ± 0.34  | 0.571 ± 0.249  | 0.92 ± 0.40 | 0.0008  |
| Tgfb1    | 0.22 ± 0.017    | 0.545 ± 0.065  | 1.09 ± 0.13  | 0.315 ± 0.027  | 0.63 ± 0.06 | 0.0001  |
| Tnf      | 0.006 ± 0.002   | 0.007 ± 0.001  | 1.25 ± 0.20  | 0.005 ± 0.001  | 0.82 ± 0.23 | 0.2953  |
| Tnfrsf1a | 0.161 ± 0.02    | 0.137 ± 0.030  | 1.05 ± 0.23  | 0.117 ± 0.022  | 0.90 ± 0.17 | 0.0091  |
| Tnfrsf1b | 0.05 ± 0.004    | 0.055 ± 0.009  | 1.09 ± 0.18  | 0.037 ± 0.007  | 0.73 ± 0.15 | 0.1970  |
| Cd40lg   | 0.001 ± 0.0003  | 0.001 ± 0.0002 | 1.42 ± 0.37  | 0.001 ± 0.0003 | 1.50 ± 0.47 | 0.0177  |
| Tollip   | 0.287 ± 0.015   | 0.139 ± 0.018  | 1.15 ± 0.15  | 0.152 ± 0.015  | 1.26 ± 0.12 | <0.0001 |
| Xcr1     | 0.001 ± 0.0004  | 0.001 ± 0.0004 | 1.16 ± 0.36  | 0.002 ± 0.0004 | 1.67 ± 0.36 | 0.0137  |

aline) or MMP-9 inhibitor (MMP-9i) treated mice. Samples are left ventricles (LVs) genes X 1000 and are presented as mean±SEM for n=6/group. For the post-test vs D1 MMP-9i, and 6-D7 Saline vs D7 MMP-9i.

| 4. D7 Saline   | D7 Saline fold change | 5. D7 MMP-9i     | D7 MMP-9i fold change | p value | post-test |
|----------------|-----------------------|------------------|-----------------------|---------|-----------|
| 0.622 ± 0.064  | 0.77 ± 0.08           | 0.455 ± 0.028    | 0.56 ± 0.04           | 0.0001  | 1,2,3,4,6 |
| 0.108 ± 0.024  | 0.65 ± 0.14           | 0.129 ± 0.023    | 0.78 ± 0.14           | 0.2110  | 1,2       |
| 0.002 ± 0.0004 | 0.78 ± 0.15           | 0.005 ± 0.001    | 1.78 ± 0.36           | 0.0370  | 4,6       |
| 0.751 ± 0.249  | 0.81 ± 0.27           | 0.747 ± 0.113    | 0.81 ± 0.12           | 0.7467  | 1,2       |
| 0.131 ± 0.021  | 2.37 ± 0.38           | 0.093 ± 0.02     | 1.69 ± 0.37           | 0.0257  | 3         |
| 0.002 ± 0.001  | 3.87 ± 2.55           | 0.0005 ± 0.0001  | 0.95 ± 0.11           | 0.3096  |           |
| 0.002 ± 0.001  | 0.15 ± 0.09           | 0.003 ± 0.001    | 0.19 ± 0.05           | 0.0098  | 1,2,3,4   |
| 0.077 ± 0.023  | 1.87 ± 0.55           | 0.149 ± 0.032    | 3.60 ± 0.78           | 0.0174  | 4,6       |
| 0.019 ± 0.007  | 29.11 ± 9.78          | 0.019 ± 0.003    | 28.63 ± 5.15          | 0.0100  | 3,4       |
| 0.138 ± 0.027  | 1.16 ± 0.23           | 0.105 ± 0.022    | 0.88 ± 0.18           | 0.5871  |           |
| 0.077 ± 0.017  | 0.76 ± 0.17           | 0.154 ± 0.023    | 1.54 ± 0.23           | 0.0339  | 1,2,6     |
| 0.001 ± 0.0001 | 1.62 ± 0.35           | 0.0003 ± 0.00004 | 0.85 ± 0.09           | 0.1384  |           |
| 0.004 ± 0.003  | 5.21 ± 4.17           | 0.002 ± 0.0004   | 1.96 ± 0.48           | 0.4629  |           |
| 0.001 ± 0.0002 | 0.18 ± 0.04           | 0.001 ± 0.00009  | 0.14 ± 0.03           | <0.0001 | 3,4       |
| 0.007 ± 0.001  | 1.63 ± 0.27           | 0.007 ± 0.001    | 1.66 ± 0.33           | 0.1675  | 1         |
| 0.006 ± 0.002  | 3.40 ± 1.10           | 0.016 ± 0.003    | 8.89 ± 1.69           | 0.0008  | 1,2       |
| 0.026 ± 0.006  | 4.94 ± 1.12           | 0.042 ± 0.012    | 8.03 ± 2.30           | 0.0146  | 1,4       |
| 0.07 ± 0.033   | 2.90 ± 1.38           | 0.053 ± 0.013    | 2.20 ± 0.52           | 0.3244  |           |
| 0.015 ± 0.003  | 0.61 ± 0.10           | 0.043 ± 0.01     | 1.72 ± 0.39           | 0.0359  | 6         |
| 0.077 ± 0.026  | 1.04 ± 0.35           | 0.193 ± 0.047    | 2.60 ± 0.63           | 0.0295  | 1,2,4,6   |
| 0.084 ± 0.029  | 2.41 ± 0.81           | 0.149 ± 0.041    | 4.27 ± 0.16           | 0.0445  | 4         |
| 0.044 ± 0.006  | 1.26 ± 0.16           | 0.082 ± 0.021    | 2.39 ± 0.60           | 0.0361  | 1,2,4,6   |
| 0.029 ± 0.003  | 1.34 ± 0.15           | 0.082 ± 0.021    | 3.78 ± 0.95           | 0.0002  | 1,2,4,6   |
| 0.051 ± 0.017  | 3.35 ± 1.10           | 0.13 ± 0.022     | 8.53 ± 1.44           | 0.0005  | 4,6       |
| 0.053 ± 0.018  | 5.11 ± 1.79           | 0.141 ± 0.022    | 13.74 ± 2.12          | 0.0002  | 4,6       |
| 0.002 ± 0.001  | 2.06 ± 0.8            | 0.001 ± 0.0003   | 1.11 ± 0.40           | 0.3374  |           |
| 0.145 ± 0.041  | 4.09 ± 1.15           | 0.27 ± 0.068     | 7.62 ± 1.91           | 0.0087  | 4         |
| 0.006 ± 0.003  | 3.54 ± 2.02           | 0.004 ± 0.001    | 2.61 ± 0.92           | 0.4258  |           |
| 0.011 ± 0.003  | 4.03 ± 1.25           | 0.009 ± 0.002    | 3.49 ± 0.92           | 0.0737  |           |
| 0.001 ± 0.0004 | 3.49 ± 1.30           | 0.0004 ± 0.0001  | 1.30 ± 0.22           | 0.0752  | 1         |
| 0.005 ± 0.002  | 0.37 ± 0.13           | 0.006 ± 0.001    | 0.42 ± 0.05           | 0.0160  | 3,4       |
| 0.001 ± 0.0001 | 1.59 ± 0.41           | 0.0003 ± 0.00004 | 0.90 ± 0.10           | 0.2177  |           |
| 0.347 ± 0.079  | 2.95 ± 0.67           | 0.337 ± 0.048    | 2.86 ± 0.41           | 0.0135  | 3,4       |
| 0.005 ± 0.002  | 0.60 ± 0.21           | 0.004 ± 0.0005   | 0.44 ± 0.05           | 0.2267  | 1,2       |
| 0.071 ± 0.026  | 6.23 ± 2.25           | 0.07 ± 0.017     | 6.16 ± 1.51           | 0.0518  | 1         |
| 0.001 ± 0.0003 | 0.43 ± 0.11           | 0.001 ± 0.0004   | 0.50 ± 0.16           | 0.0508  | 2         |
| 0.948 ± 0.104  | 0.76 ± 0.08           | 1.23 ± 0.083     | 0.99 ± 0.07           | 0.0364  |           |
| 0.038 ± 0.035  | 8.96 ± 8.24           | 0.005 ± 0.003    | 1.23 ± 0.78           | 0.4292  |           |
| 0.001 ± 0.0001 | 1.25 ± 0.31           | 0.001 ± 0.0001   | 1.23 ± 0.25           | 0.7919  |           |
| 0.082 ± 0.019  | 0.81 ± 0.18           | 0.445 ± 0.117    | 1.37 ± 1.15           | 0.0030  | 4         |
| 0.005 ± 0.002  | 1.86 ± 0.56           | 0.022 ± 0.006    | 7.53 ± 2.26           | 0.0077  | 1,2,4,6   |
| 0.038 ± 0.032  | 0.86 ± 0.71           | 0.021 ± 0.006    | 0.47 ± 0.14           | 0.6761  | 1,2       |
| 0.009 ± 0.003  | 9.03 ± 2.84           | 0.013 ± 0.002    | 12.23 ± 1.77          | 0.0029  | 3,4       |

|                |               |                  |               |         |           |
|----------------|---------------|------------------|---------------|---------|-----------|
| 0.017 ± 0.003  | 0.70 ± 0.14   | 0.015 ± 0.002    | 0.62 ± 0.10   | 0.0771  | 1,2       |
| 0.001 ± 0.0005 | 1.57 ± 0.52   | 0.001 ± 0.0001   | 0.75 ± 0.16   | 0.3238  |           |
| 0.003 ± 0.001  | 2.28 ± 0.75   | 0.003 ± 0.001    | 2.59 ± 0.42   | 0.0402  | 1         |
| 0.072 ± 0.015  | 3.54 ± 0.76   | 0.107 ± 0.02     | 5.26 ± 0.97   | 0.0027  | 3,4       |
| 0.472 ± 0.094  | 0.41 ± 0.08   | 0.549 ± 0.052    | 0.47 ± 0.04   | <0.0001 | 1,2,3,4   |
| 0.002 ± 0.0004 | 1.79 ± 0.42   | 0.003 ± 0.001    | 3.14 ± 0.65   | 0.0180  | 1,2,4     |
| 0.001 ± 0.0004 | 2.23 ± 0.73   | 0.0004 ± 0.0001  | 0.72 ± 0.13   | 0.1403  |           |
| 0.23 ± 0.03    | 1.06 ± 0.14   | 0.243 ± 0.03     | 1.12 ± 0.14   | 0.7867  |           |
| 0.099 ± 0.018  | 0.27 ± 0.05   | 0.104 ± 0.012    | 0.29 ± 0.03   | <0.0001 | 1,2,3,4   |
| 0.015 ± 0.004  | 0.58 ± 0.13   | 0.028 ± 0.004    | 1.06 ± 0.15   | 0.0356  | 1,2,3,5,6 |
| 0.001 ± 0.0004 | 2.11 ± 0.81   | 0.0003 ± 0.00004 | 0.72 ± 0.08   | 0.1683  |           |
| 0.022 ± 0.004  | 2.58 ± 0.46   | 0.034 ± 0.003    | 3.95 ± 0.38   | 0.0002  | 3,4,6     |
| 0.002 ± 0.001  | 1.16 ± 0.40   | 0.001 ± 0.001    | 0.70 ± 0.3    | 0.5702  |           |
| 0.02 ± 0.009   | 1.12 ± 0.47   | 0.037 ± 0.006    | 2.02 ± 0.33   | 0.1561  | 1,2       |
| 0.001 ± 0.0003 | 2.17 ± 0.95   | 0.0003 ± 0.00004 | 0.89 ± 0.10   | 0.2331  | 1         |
| 0.001 ± 0.0001 | 1.04 ± 0.27   | 0.0003 ± 0.00004 | 0.58 ± 0.07   | 0.5196  |           |
| 0.242 ± 0.029  | 2.40 ± 0.29   | 0.276 ± 0.026    | 2.75 ± 0.26   | 0.0002  | 1,2,3,4   |
| 0.012 ± 0.003  | 2.60 ± 0.61   | 0.04 ± 0.026     | 8.33 ± 5.39   | 0.2528  | 1,2       |
| 0.001 ± 0.0001 | 0.91 ± 0.23   | 0.001 ± 0.0001   | 0.57 ± 0.08   | 0.4384  |           |
| 0.007 ± 0.003  | 3.12 ± 1.27   | 0.007 ± 0.003    | 3.48 ± 1.23   | 0.2192  |           |
| 0.072 ± 0.027  | 1.03 ± 0.39   | 0.117 ± 0.022    | 1.68 ± 0.31   | 0.2098  | 1,2       |
| 0.001 ± 0.0003 | 1.94 ± 0.69   | 0.0003 ± 0.00004 | 0.71 ± 0.08   | 0.1889  | 2         |
| 0.002 ± 0.0004 | 1.23 ± 0.28   | 0.001 ± 0.0002   | 0.60 ± 0.12   | 0.1556  |           |
| 0.001 ± 0      | 1.55 ± 0.68   | 0.0005 ± 0.0001  | 0.93 ± 0.20   | 0.5714  |           |
| 0.089 ± 0.015  | 1.71 ± 0.28   | 0.151 ± 0.01     | 2.88 ± 0.20   | <0.0001 | 3,4,6     |
| 0.674 ± 0.163  | 0.85 ± 0.21   | 1.08 ± 0.174     | 1.37 ± 0.22   | 0.2419  | 1,2       |
| 0.002 ± 0.001  | 0.21 ± 0.08   | 0.006 ± 0.002    | 0.82 ± 0.30   | 0.1693  | 1,2       |
| 0.169 ± 0.031  | 2.81 ± 0.51   | 0.299 ± 0.037    | 4.98 ± 0.61   | <0.0001 | 1,2,4     |
| 0.137 ± 0.043  | 3.1 ± 0.97    | 0.301 ± 0.047    | 6.8 ± 1.05    | 0.0014  | 4         |
| 0.001 ± 0.0001 | 2.7 ± 0.48    | 0.0005 ± 0.0001  | 1.56 ± 0.40   | 0.0200  | 1,3       |
| 0.007 ± 0.002  | 2.5 ± 0.61    | 0.009 ± 0.002    | 3.07 ± 0.71   | 0.0508  | 4         |
| 0.967 ± 0.225  | 0.85 ± 0.20   | 1.32 ± 0.236     | 1.16 ± 0.21   | 0.7834  |           |
| 0.354 ± 0.057  | 0.45 ± 0.07   | 0.416 ± 0.053    | 0.53 ± 0.07   | <0.0001 | 1,2,3,4   |
| 1.23 ± 0.789   | 65.23 ± 41.87 | 4.315 ± 0.953    | 228.9 ± 50.56 | 0.0021  | 1,2,4     |
| 0.345 ± 0.066  | 1.57 ± 0.30   | 0.471 ± 0.052    | 2.14 ± 0.24   | 0.0096  | 1,5       |
| 0.003 ± 0.001  | 0.46 ± 0.19   | 0.006 ± 0.001    | 0.90 ± 0.17   | 0.1543  |           |
| 0.119 ± 0.027  | 0.74 ± 0.17   | 0.215 ± 0.034    | 1.33 ± 0.21   | 0.0772  | 2         |
| 0.082 ± 0.019  | 1.64 ± 0.38   | 0.194 ± 0.044    | 3.89 ± 0.88   | 0.0057  | 4,6       |
| 0.001 ± 0.0002 | 1.63 ± 0.39   | 0.001 ± 0.001    | 1.55 ± 1.01   | 0.7889  |           |
| 0.124 ± 0.013  | 0.43 ± 0.05   | 0.148 ± 0.016    | 0.52 ± 0.05   | <0.0001 | 1,2,3,4   |
| 0.01 ± 0.008   | 8.84 ± 6.84   | 0.003 ± 0.001    | 2.77 ± 0.65   | 0.3671  | 2         |
